# Supplementary material for: Targeted Deletion of Nrf2 Reduces Urethane-Induced Lung Tumor Development in Mice
Source: PLoS One. 2011 Oct 21;6(10):e26590. doi: 10.1371/journal.pone.0026590 (PMC3198791; doi:10.1371/journal.pone.0026590)
Supplement: Dataset S2 — Genes differentially changed between Nrf2-WT and Nrf2-KO mice by urethane in tumors at 22 wk (n = 376). (XLS) [file pone.0026590.s008.xls]

## Sheet: Clusters
Dataset S2. Genes differentially changed between Nrf2-WT and Nrf2-KO mice by urethane in tumors at 22 wk (n=376)
#Clustering Algorithm: K-Means
#Clustered On: Entities
#Similarity Measure: Euclidean
#Number of Clusters: 4
#Maximum number of iterations: 50
#)
# Technology : Affymetrix.GeneChip.Mouse430_2
# Owner : gxuser
# Created On : Fri Jun 18 15:43:40 EDT 2010										vs WT Sal				vs WT Sal
GeneName	[Nrf2, Saline](raw)	[Nrf2, U-NT](raw)	[Nrf2, U-T](raw)	[Nrf2-KO, Saline](raw)	[Nrf2-KO, U-NT](raw)	[Nrf2-KO, U-T](raw)	[Nrf2, Saline](normalized)	[Nrf2, U-NT](normalized)	[Nrf2, U-T](normalized)	Fold Change in WT tumor	[Nrf2-KO, Saline](normalized)	[Nrf2-KO, U-NT](normalized)	[Nrf2-KO, U-T](normalized)	Fold Change in KO tumor	Cluster (Fig. 7-C)	RefSeq Transcript ID	Gene Symbol	Gene Title	Entrez Gene	Chromosomal Location	Gene Ontology Biological Process	Pathway	QTL
1418083_at	571.481	590.241	886.059	496.324	513.383	708.48	-0.000811186	0.0605093	0.719288	1.64637	-0.181998	-0.134555	0.412555	1.33104	0	NM_025319	0610009B22Rik	RIKEN cDNA 0610009B22 gene	66050	chr11 B1.3	0006350 // transcription // inferred from electronic annotation /// 0006355 // regulation of transcription, DNA-dependent // inferred from sequence or structural similarity /// 0006810 // transport // inferred from electronic annotation /// 0006888 // ER to Golgi vesicle-mediated transport // inferred from electronic annotation /// 0016192 // vesicle-mediated transport // inferred from electronic…
1431008_at	1686.5	2095.01	693.289	382.704	577.196	389.923	-0.0297322	0.312566	-1.2069	0.433199	-2.12484	-1.54487	-2.01498	0.247418	0	XM_903697	0610037M15Rik	RIKEN cDNA 0610037M15 gene	68395		0002474 // antigen processing and presentation of peptide antigen via MHC class I // inferred from electronic annotation /// 0006955 // immune response // inferred from electronic annotation /// 0019882 // antigen processing and presentation // inferred from electronic annotation
1454723_at	478.462	451.93	330.199	581.348	566.716	420.776	-0.00210764	-0.0645901	-0.452073	0.730992	0.304755	0.263766	-0.0836322	0.943679	0	XM_193728 /// XM_911881	1110033M05Rik	RIKEN cDNA 1110033M05 gene	68675	chr13 C1
1460466_at	366.549	350.354	485.72	743.875	774.944	959.661	-0.00114212	-0.0689178	0.492329	1.40671	1.04292	1.09966	1.49095	2.81075	0	NM_028527	1700047I17Rik1	RIKEN cDNA 1700047I17 gene 1	73385	chr12 C1
1449832_at	17.3232	17.9006	22.3235	17.444	16.6748	35.2691	-0.000176623	0.0617894	0.443205	1.35962	0.0265463	-0.0350971	1.12832	2.18604	0	XM_983279	1700091H14Rik	RIKEN cDNA 1700091H14 gene	73553	chr14 B
1418662_at	124.706	139.357	170.635	100.021	105.081	110.162	-4.34925e-05	0.179142	0.537707	1.45166	-0.300773	-0.227963	-0.0795671	0.946342	0	NM_025617	2210012G02Rik	RIKEN cDNA 2210012G02 gene	66526	chr4 C7	0006350 // transcription // inferred from electronic annotation /// 0006354 // RNA elongation // inferred from electronic annotation /// 0006355 // regulation of transcription, DNA-dependent // inferred from electronic annotation
1456779_a_at	90.3247	74.7138	71.3904	135.402	107.605	88.9766	-0.00150675	-0.309531	-0.260926	0.834552	0.606343	0.261721	0.0804694	1.05736	0		4930414L22Rik	RIKEN cDNA 4930414L22 gene	78108
1429669_at	53.7931	60.571	69.0226	61.6588	60.6349	63.7889	-0.000133675	0.173695	0.446604	1.36283	0.221718	0.193059	0.349394	1.27403	0	NR_026888	4930488L21Rik	RIKEN cDNA 4930488L21 gene	75809	chr8 C5
1452993_at	122.484	122.135	281.86	91.7588	89.8698	151.125	-0.0124338	0.00325117	1.28001	2.42841	-0.396624	-0.437096	0.407065	1.32599	0	NM_027789	5430416O09Rik	RIKEN cDNA 5430416O09 gene	71406	chr4 B1
1455859_at	229.174	174.111	71.438	168.899	191.254	48.9221	-0.00219165	-0.410459	-1.59524	0.330967	-0.41956	-0.24089	-2.14422	0.226217	0	NM_172447	A330021E22Rik	RIKEN cDNA A330021E22 gene	207686	chr5 A1
1440162_x_at	41.0915	40.2799	88.9583	39.4062	49.8189	36.5376	-0.00722813	-0.0131182	1.19345	2.28699	-0.0445692	0.255177	-0.076553	0.948321	0		A630043P06	hypothetical protein A630043P06	328187	chr13 A1
1422715_s_at	589.401	540.106	920.443	570.109	637.089	741.922	-0.00053582	-0.112979	0.729762	1.65837	-0.0232569	0.130691	0.435035	1.35194	0	NM_001110239 /// NM_021330	Acp1	acid phosphatase 1, soluble	11431	chr12 A2	0006470 // protein amino acid dephosphorylation // inferred from electronic annotation
1452595_at	30.8425	37.5433	77.0205	30.4535	31.348	42.2746	-0.0112875	0.289636	1.40567	2.64941	-0.018517	0.0431267	0.558479	1.47272	0	NM_172845	Adamts4	a disintegrin-like and metallopeptidase (reprolysin type) with thrombospondin type 1 motif, 4	240913	chr1 H3|1 92.3 cM	0006508 // proteolysis // inferred from direct assay /// 0006508 // proteolysis // inferred from electronic annotation
1435855_x_at	197.158	200.325	463.318	166.259	200.072	327.297	-0.00600859	0.0274915	1.31917	2.49522	-0.22218	0.0425318	0.83428	1.78297	0	NM_019698 /// NM_153554	Aldh18a1	aldehyde dehydrogenase 18 family, member A1	56454	chr19 C3	0006561 // proline biosynthetic process // inferred from electronic annotation /// 0008152 // metabolic process // inferred from electronic annotation /// 0008652 // amino acid biosynthetic process // traceable author statement /// 0008652 // amino acid biosynthetic process // inferred from electronic annotation /// 0055114 // oxidation reduction // inferred from electronic annotation
1460167_at	724.272	758.104	1021.26	706.587	732.547	703.577	-0.00157556	0.0845964	0.582069	1.49699	-0.0104827	0.0368309	0.0608429	1.04308	0	NM_001127338 /// NM_138600	Aldh7a1	aldehyde dehydrogenase family 7, member A1	110695	chr18 D3|18 29.0 cM	0008152 // metabolic process // inferred from electronic annotation /// 0055114 // oxidation reduction // inferred from electronic annotation
1439066_at	1213.8	1108.06	202.24	1484.27	1163.67	351.107	-0.00207543	-0.130075	-2.49983	0.176797	0.314663	-0.0417078	-1.68801	0.310355	0	NM_009640	Angpt1	angiopoietin 1	11600	chr15 B3.1|15 14.3 cM	0001525 // angiogenesis // inferred from electronic annotation /// 0007165 // signal transduction // inferred from electronic annotation /// 0007169 // transmembrane receptor protein tyrosine kinase signaling pathway // inferred from direct assay /// 0007275 // multicellular organismal development // inferred from electronic annotation /// 0007492 // endoderm development // traceable author state…
1419435_at	1289.09	1155.43	1603.23	270.527	322.503	462.883	-0.000688349	-0.138433	0.386665	1.30737	-2.24619	-1.98025	-1.37899	0.384489	0	NM_009676	Aox1	aldehyde oxidase 1	11761	chr1 C1-C2|1 23.2 cM	0055114 // oxidation reduction // inferred from electronic annotation
1418858_at	2115.96	2130.43	4216.8	644.16	837.548	1516.34	-0.00452215	0.0269769	1.08066	2.11501	-1.69297	-1.31575	-0.382065	0.767339	0	NM_023617	Aox3	aldehyde oxidase 3	71724	chr1 C1.3|1 23.2 cM	0055114 // oxidation reduction // inferred from electronic annotation
1417112_at	3278.23	2955.11	2050.81	179.49	198.38	139.953	-0.00162058	-0.131492	-0.592818	0.663046	-4.16614	-4.0271	-4.45867	0.0454785	0	NM_024191 /// NM_024269	Arl2bp	ADP-ribosylation factor-like 2 binding protein	107566	chr8 C5
1429859_a_at	1388.24	1223.63	924.831	147.19	148.713	200.807	-0.00107767	-0.164772	-0.503843	0.705226	-3.23488	-3.21222	-2.68718	0.155266	0	NM_024191 /// NM_024269	Arl2bp	ADP-ribosylation factor-like 2 binding protein	107566	chr8 C5
1426818_at	485.934	408.623	312.512	348.444	360.464	298.028	-0.000256741	-0.233469	-0.553951	0.681152	-0.454611	-0.423628	-0.602298	0.658704	0	NM_001042592 /// NM_025549	Arrdc4	arrestin domain containing 4	66412	chr7 D1		Statin_Pathway_PharmGKB // GenMAPP
1423653_at	2735.86	3144.22	6355.18	2614.85	2992.55	3904.22	-0.00680479	0.215435	1.30094	2.46389	-0.0398535	0.150306	0.616214	1.53285	0	NM_144900	Atp1a1	ATPase, Na+/K+ transporting, alpha 1 polypeptide	11928	chr3 F3|3 48.4 cM	0002026 // regulation of the force of heart contraction // inferred from mutant phenotype /// 0006754 // ATP biosynthetic process // inferred from electronic annotation /// 0006810 // transport // inferred from electronic annotation /// 0006811 // ion transport // inferred from electronic annotation /// 0006812 // cation transport // inferred from electronic annotation /// 0006813 // potassium io…
1419922_s_at	1677.2	1443.35	1174.45	195.256	176.029	136.244	-0.00309185	-0.203836	-0.43537	0.739504	-3.07997	-3.24147	-3.52	0.0871716	0	NM_181415	Atrnl1	attractin like 1	226255	chr19 D2	0007186 // G-protein coupled receptor protein signaling pathway // inferred from physical interaction
1440984_at	109.971	74.7003	140.769	79.3024	94.9054	76.605	-0.011274	-0.56684	0.440563	1.35713	-0.452848	-0.201239	-0.438906	0.737694	0	NM_001001182	Baz2b	bromodomain adjacent to zinc finger domain, 2B	407823	chr2 C1.1
1424663_at	583.883	485.106	509.142	491.382	561.978	343.099	-0.000181684	-0.249338	-0.112173	0.925194	-0.223776	-0.0352313	-0.674194	0.626682	0	NM_145430	BC017647	cDNA sequence BC017647	216971	chr11 B5
1455241_at	22.1086	22.4486	36.2587	17.1562	20.4573	22.7534	-0.00698126	0.0330386	0.797805	1.73845	-0.343407	-0.0955412	0.143029	1.10422	0	NM_172295	BC037703	cDNA sequence BC037703	242125	chr3 F2.2
1418133_at	396.305	355.585	469.064	237.125	301.271	378.096	-0.00696138	-0.138381	0.330045	1.25705	-0.721122	-0.377532	0.033962	1.02382	0	NM_033601	Bcl3	B-cell leukemia/lymphoma 3	12051	chr7 A3|7 6.5 cM	0000060 // protein import into nucleus, translocation // inferred from electronic annotation /// 0002268 // follicular dendritic cell differentiation // inferred from mutant phenotype /// 0002315 // marginal zone B cell differentiation // inferred from mutant phenotype /// 0002455 // humoral immune response mediated by circulating immunoglobulin // inferred from mutant phenotype /// 0002467 // ge…
1451386_at	591.164	631.865	761.2	539.278	546.097	567.299	-0.00228982	0.114865	0.452194	1.36812	-0.106987	-0.0949812	0.0438619	1.03087	0	NM_144923	Blvrb	biliverdin reductase B (flavin reductase (NADPH))	233016	chr7 A3	0008152 // metabolic process // inferred from electronic annotation /// 0044237 // cellular metabolic process // inferred from electronic annotation /// 0055114 // oxidation reduction // inferred from electronic annotation
1416924_at	2678.11	2554.12	2786.17	2957.79	2832.72	3460.55	-0.00162996	-0.0501707	0.14328	1.10441	0.16626	0.100485	0.47254	1.38755	0	NM_018772	Bri3	brain protein I3	55950	chr5 G2
1417378_at	2658.87	2557.11	1570.17	3299.97	2880.75	2378.49	-0.00019301	-0.0369859	-0.674786	0.626425	0.330553	0.135552	-0.0583512	0.960361	0	NM_001025600 /// NM_018770 /// NM_207675 /// NM_207676	Cadm1	cell adhesion molecule 1	54725	chr9 B-C	0006915 // apoptosis // inferred from electronic annotation /// 0006955 // immune response // inferred from electronic annotation /// 0007049 // cell cycle // inferred from electronic annotation /// 0007155 // cell adhesion // inferred from direct assay /// 0007155 // cell adhesion // inferred from electronic annotation /// 0007156 // homophilic cell adhesion // inferred from direct assay /// 000…
1424770_at	1460.91	1394.43	2659.56	1338.58	1413.1	1614.3	-0.00035162	-0.0530875	0.947797	1.92892	-0.101498	-0.0299139	0.247513	1.18716	0	NM_145575	Cald1	caldesmon 1	109624	chr6 B1|6 11.5 cM	0006936 // muscle contraction // inferred from electronic annotation /// 0006940 // regulation of smooth muscle contraction // traceable author statement	Smooth_muscle_contraction // GenMAPP
1431255_at	30.569	34.5364	28.0886	40.1919	29.1144	31.7894	-2.95397e-05	0.140363	-0.0416632	0.971534	0.419146	-0.0516682	0.159727	1.11708	0	NM_028500 /// NM_029782	Calr3	calreticulin 3	73316	chr8 C1	0006457 // protein folding // inferred from electronic annotation
1449145_a_at	13741.6	13286.1	4130.77	14288.3	13600.8	6509.59	-0.000376094	-0.0299395	-1.65558	0.317409	0.0807609	0.00536856	-0.975764	0.508471	0	NM_007616	Cav1	caveolin 1, caveolae protein	12389	chr6 A2	0000165 // MAPKKK cascade // inferred from mutant phenotype /// 0000188 // inactivation of MAPK activity // inferred from mutant phenotype /// 0001570 // vasculogenesis // inferred from mutant phenotype /// 0001666 // response to hypoxia // inferred from mutant phenotype /// 0001937 // negative regulation of endothelial cell proliferation // inferred from mutant phenotype /// 0001937 // negative …	Integrin-mediated_cell_adhesion_KEGG // GenMAPP
1430514_a_at	2733.99	2616.55	2121.77	1727.66	1696.46	1338.68	-0.00853427	-0.0615281	-0.287253	0.819461	-0.640654	-0.669249	-0.929701	0.524967	0	NM_025584 /// XM_001004429	Cd99	CD99 antigen	673094
1453556_x_at	3481.42	3282.48	2626.75	2213.48	2096.24	1655.55	-0.0141407	-0.0808185	-0.322746	0.799547	-0.630704	-0.713197	-0.971712	0.509901	0	NM_025584 /// XM_001004429	Cd99	CD99 antigen	673094
1436343_at	158.586	173.1	182.175	135.389	123.987	135.42	-0.000522316	0.086876	0.286846	1.21997	-0.208626	-0.337915	-0.125423	0.916735	0	NM_145979	Chd4	chromodomain helicase DNA binding protein 4	107932	chr6 F3|6 58.4 cM	0006333 // chromatin assembly or disassembly // inferred from electronic annotation /// 0006350 // transcription // inferred from electronic annotation /// 0006355 // regulation of transcription, DNA-dependent // inferred from electronic annotation /// 0016568 // chromatin modification // inferred from electronic annotation /// 0045449 // regulation of transcription // inferred from electronic an…
1422758_at	267.948	285.102	80.7245	364.909	347.131	129.249	-0.00137323	0.107842	-1.67395	0.313395	0.46815	0.392952	-0.951135	0.517225	0	NM_018763 /// XM_001471695	Chst2	carbohydrate sulfotransferase 2	54371		0005975 // carbohydrate metabolic process // inferred from electronic annotation /// 0006044 // N-acetylglucosamine metabolic process // traceable author statement /// 0006044 // N-acetylglucosamine metabolic process // inferred from electronic annotation /// 0006790 // sulfur metabolic process // inferred from electronic annotation /// 0006954 // inflammatory response // inferred from electronic…
1416698_a_at	738.985	847.398	3136.09	649.845	812.018	2157.5	-0.0131502	0.199278	2.16813	4.4944	-0.164774	0.154546	1.64703	3.13188	0	NM_016904	Cks1b	CDC28 protein kinase 1b	54124	chr3 F1	0007049 // cell cycle // inferred from electronic annotation /// 0051301 // cell division // inferred from electronic annotation
1448441_at	156.546	175.234	693.892	137.07	166.761	405.24	-0.00668716	0.179535	2.23217	4.69839	-0.172059	0.109048	1.46953	2.76932	0	NM_016904	Cks1b	CDC28 protein kinase 1b	54124	chr3 F1	0007049 // cell cycle // inferred from electronic annotation /// 0051301 // cell division // inferred from electronic annotation
1417458_s_at	243.19	280.023	1021.64	200.167	287.34	583.64	-0.00406296	0.218563	2.15352	4.44913	-0.260901	0.260649	1.3641	2.57416	0	NM_025415	Cks2	CDC28 protein kinase regulatory subunit 2	66197	chr13 A5	0007049 // cell cycle // inferred from electronic annotation /// 0007127 // meiosis I // inferred from mutant phenotype /// 0051301 // cell division // inferred from electronic annotation
1439117_at	165.267	162.667	449.984	148.404	125.345	299.343	-0.00619601	-0.00212971	1.53154	2.89093	-0.135098	-0.379413	0.955184	1.93883	0	NM_001040682 /// NM_053155	Clmn	calmin	94040	chr12 F1
1431510_s_at	290.46	324.542	500.667	431.635	412.295	591.102	-0.00362448	0.157165	0.868228	1.82542	0.593317	0.524057	1.12726	2.18443	0	NM_026442	Cmc1	COX assembly mitochondrial protein homolog (S. cerevisiae)	67899	chr9 F3
1448111_at	118.459	107.661	151.902	732.856	727.359	766.484	-0.00177869	-0.133392	0.434567	1.35151	2.6536	2.62727	2.79671	6.94853	0	NM_018737	Ctps2	cytidine 5'-triphosphate synthase 2	55936	chrX F5	0006221 // pyrimidine nucleotide biosynthetic process // inferred from electronic annotation /// 0006541 // glutamine metabolic process // inferred from electronic annotation
1457644_s_at	387.408	230.708	819.233	168.288	188.369	382.285	-0.00389233	-0.732448	1.16243	2.23834	-1.18641	-1.02511	0.0841511	1.06006	0	NM_008176	Cxcl1	chemokine (C-X-C motif) ligand 1	14825	chr5 E-F|5 51.0 cM	0006954 // inflammatory response // inferred from electronic annotation /// 0006955 // immune response // inferred from electronic annotation
1424048_a_at	734.546	811.939	1725.1	754.971	789.547	1309.5	-0.000253857	0.164408	1.31885	2.49468	0.0599049	0.123291	0.936082	1.91332	0	NM_028057	Cyb5r1	cytochrome b5 reductase 1	72017	chr1 E4	0006694 // steroid biosynthetic process // inferred from electronic annotation /// 0008610 // lipid biosynthetic process // inferred from electronic annotation /// 0016126 // sterol biosynthetic process // inferred from electronic annotation /// 0055114 // oxidation reduction // inferred from electronic annotation
1424936_a_at	120.116	136.271	99.1406	323.002	288.549	152.196	-0.00189997	0.170056	-0.191156	0.875904	1.43462	1.24762	0.444902	1.36122	0	NM_013811	Dnahc8	dynein, axonemal, heavy chain 8	13417	chr17 A3.3	0007018 // microtubule-based movement // inferred from electronic annotation
1426904_s_at	1108.57	1041.38	1091.45	782.307	885.273	872.688	-0.00148602	-0.0701647	0.0614484	1.04351	-0.477787	-0.304991	-0.241283	0.845993	0	NM_024181 /// XR_033124	Dnajc10 /// LOC100047007	DnaJ (Hsp40) homolog, subfamily C, member 10 /// similar to DnaJ (Hsp40) homolog, subfamily C, member 10	100047007 /// 66861	chr2 D	0006457 // protein folding // inferred from electronic annotation /// 0045454 // cell redox homeostasis // inferred from electronic annotation
1453473_a_at	4041.19	4060.93	5108.69	2305.1	2845.22	3207.93	-0.00171936	0.0259067	0.424104	1.34174	-0.787207	-0.485831	-0.231382	0.851818	0	NM_009342 /// XM_001475602 /// XM_001475617 /// XM_001475631 /// XM_001475648 /// XM_001481167 /// XM_001481168	Dynlt1 /// Dynlt1d /// ENSMUSG00000056252	dynein light chain Tctex-type 1 /// dynein light chain Tctex-type 1D /// predicted gene, ENSMUSG00000056252	100040603 /// 100043890 /// 21648	chr17 A1|17 /// chr17 A1|17 3.1 cM /// chr6 G1	0007017 // microtubule-based process // inferred from direct assay
1434564_at	160.201	146.237	255.851	132.043	161.716	212.305	-0.000571339	-0.154841	0.76213	1.69599	-0.256053	0.0321552	0.507488	1.42157	0	NM_010093	E2f3	E2F transcription factor 3	13557	chr13 A3.3	0006350 // transcription // inferred from electronic annotation /// 0006355 // regulation of transcription, DNA-dependent // inferred from direct assay /// 0006355 // regulation of transcription, DNA-dependent // inferred from electronic annotation /// 0007049 // cell cycle // inferred from electronic annotation /// 0008284 // positive regulation of cell proliferation // inferred from direct assa…	Cell_Cycle_KEGG // GenMAPP /// G1_to_S_cell_cycle_Reactome // GenMAPP
1440815_x_at	14.5736	14.6515	16.3403	19.7166	18.1844	33.5289	-0.0092719	0.0273266	0.2526	1.19135	0.451086	0.321925	1.30551	2.47171	0	XM_904187 /// XR_033489	EG666481 /// LOC624112	predicted gene, EG666481 /// hypothetical protein LOC624112	624112 /// 666481	chr14 B /// chr14 C1
1423326_at	423.134	434.322	748.414	331.053	401.295	675.097	-0.0045819	0.04441	0.90871	1.87737	-0.330034	-0.0593188	0.77658	1.71307	0	NM_009848	Entpd1	ectonucleoside triphosphate diphosphohydrolase 1	12495	chr19 C3|19 35.5 cM	0006200 // ATP catabolic process // inferred from direct assay /// 0007186 // G-protein coupled receptor protein signaling pathway // inferred from direct assay /// 0009181 // purine ribonucleoside diphosphate catabolic process // inferred from direct assay /// 0030168 // platelet activation // inferred from direct assay
1435436_at	19938.3	18740.8	8883.46	20534.5	19193.2	11517.7	-0.000363242	-0.070205	-1.08013	0.472988	0.067477	-0.0350263	-0.688963	0.6203	0	NM_010137	Epas1	endothelial PAS domain protein 1	13819	chr17 E4	0001525 // angiogenesis // inferred from mutant phenotype /// 0001525 // angiogenesis // inferred from electronic annotation /// 0001666 // response to hypoxia // inferred from mutant phenotype /// 0001666 // response to hypoxia // not recorded /// 0001666 // response to hypoxia // inferred from electronic annotation /// 0001892 // embryonic placenta development // inferred from genetic interacti…
1433702_at	892.184	825.27	1477.42	830.322	837.051	990.2	-0.000833022	-0.0958484	0.810343	1.75363	-0.0796465	-0.0729978	0.252131	1.19096	0	NM_001081213	Ermp1	endoplasmic reticulum metallopeptidase 1	226090	chr19 C1|19 24.5 cM	0006508 // proteolysis // inferred from electronic annotation
1425705_a_at	110.891	100.547	141.111	52.7911	55.5754	57.922	-0.0207243	-0.18571	0.431887	1.349	-1.04995	-0.978878	-0.836227	0.560107	0	NM_026184	Ero1lb	ERO1-like beta (S. cerevisiae)	67475	chr13 A1	0006467 // protein thiol-disulfide exchange // inferred from electronic annotation /// 0006810 // transport // inferred from electronic annotation /// 0022900 // electron transport chain // inferred from electronic annotation /// 0055114 // oxidation reduction // inferred from electronic annotation
1434714_at	545.381	481.724	698.775	421.983	426.935	370.951	-0.0042148	-0.159518	0.439941	1.35655	-0.345739	-0.337735	-0.453147	0.730448	0	NM_026184	Ero1lb	ERO1-like beta (S. cerevisiae)	67475	chr13 A1	0006467 // protein thiol-disulfide exchange // inferred from electronic annotation /// 0006810 // transport // inferred from electronic annotation /// 0022900 // electron transport chain // inferred from electronic annotation /// 0055114 // oxidation reduction // inferred from electronic annotation
1447685_x_at	619.979	580.56	374.112	746.072	627.262	450.688	-0.00250124	-0.0778936	-0.642819	0.64046	0.290225	0.0346142	-0.357516	0.780507	0	NM_011809	Ets2	E26 avian leukemia oncogene 2, 3' domain	23872	chr16 C3-qter|16 69.6 cM	0006355 // regulation of transcription, DNA-dependent // inferred from electronic annotation	Smooth_muscle_contraction // GenMAPP
1438402_at	555.628	548.742	149.346	628.211	594.429	206.809	-0.000193411	-0.00619704	-1.82716	0.281818	0.202101	0.116897	-1.32743	0.398477	0	NM_001081161	Fam171a1	family with sequence similarity 171, member A1	269233	chr2 A1
1437602_at	16.2414	21.1961	20.6789	16.3465	20.0319	26.4557	-0.000228349	0.384995	0.434762	1.35169	0.0307549	0.321996	0.806689	1.74919	0	NM_001013783 /// XM_001471494	Fam71b	family with sequence similarity 71, member B	432552	chr11 B1.1|11
1448470_at	233.575	322.815	1795.13	179.991	281.334	1034.4	-0.00841916	0.486601	3.02709	8.15162	-0.354075	0.288761	2.25051	4.75851	0	NM_019395	Fbp1	fructose bisphosphatase 1	14121	chr13 B3-C1	0005975 // carbohydrate metabolic process // inferred from electronic annotation /// 0006094 // gluconeogenesis // inferred from electronic annotation	Glycolysis_and_Gluconeogenesis // GenMAPP
1449088_at	623.98	984.386	5274.59	582.653	904.768	3783.4	-0.00336802	0.673742	3.16401	8.96318	-0.0832789	0.549874	2.70249	6.50925	0	NM_007994	Fbp2	fructose bisphosphatase 2	14120	chr13 B3	0005975 // carbohydrate metabolic process // inferred from electronic annotation /// 0006094 // gluconeogenesis // inferred from electronic annotation	Glycolysis_and_Gluconeogenesis // GenMAPP
1423491_at	187.632	190.556	148.514	215.205	200.554	175.21	-0.000611002	0.0405703	-0.251187	0.840205	0.221499	0.116092	0.00364852	1.00253	0	NM_020593 /// NM_212433	Fbxo3	F-box protein 3	57443	chr2 E2	0019941 // modification-dependent protein catabolic process // inferred from electronic annotation
1449555_a_at	69.7528	67.3838	778.189	46.0541	58.369	282.146	-0.00135276	-0.0321427	3.56435	11.8298	-0.579511	-0.242375	2.10124	4.29078	0	NM_001083904 /// NM_001083905 /// NM_021564	Fetub	fetuin beta	59083	chr16 B|16 14.1 cM
1424279_at	27.9348	31.4502	55.0776	22.7492	18.9899	28.3595	-0.00432402	0.151108	1.05885	2.08327	-0.2742	-0.539235	0.121609	1.08795	0	NM_001111048 /// NM_010196	Fga	fibrinogen alpha chain	14161	chr3 F1|3 44.8 cM	0007165 // signal transduction // inferred from electronic annotation /// 0007596 // blood coagulation // inferred from mutant phenotype /// 0030168 // platelet activation // inferred from electronic annotation /// 0051258 // protein polymerization // inferred from electronic annotation	Blood_Clotting_Cascade // GenMAPP
1416803_at	856.16	821.389	369.533	965.472	920.629	461.773	-0.0013813	-0.0508904	-1.12826	0.457466	0.198008	0.124939	-0.789192	0.578668	0	NM_010222	Fkbp7	FK506 binding protein 7	14231	chr2 C3|2 60.5 cM	0006457 // protein folding // inferred from electronic annotation
1437284_at	2153.01	2092.46	2352.65	1890.86	1964.36	1928.6	-0.000350393	-0.0215873	0.21466	1.16043	-0.16314	-0.112986	-0.0576696	0.960815	0	NM_021457	Fzd1	frizzled homolog 1 (Drosophila)	14362	chr5 A1|5 5.0 cM	0007165 // signal transduction // inferred from electronic annotation /// 0007166 // cell surface receptor linked signal transduction // inferred from electronic annotation /// 0007186 // G-protein coupled receptor protein signaling pathway // inferred from electronic annotation /// 0007267 // cell-cell signaling // inferred from direct assay /// 0007275 // multicellular organismal development //…	GPCRDB_Other // GenMAPP /// Wnt_Signaling // GenMAPP
1437760_at	142.802	119.503	263.315	112.761	117.573	113.645	-0.00455699	-0.246097	0.957662	1.94216	-0.315163	-0.263073	-0.239125	0.847259	0	NM_172693	Galnt12	UDP-N-acetyl-alpha-D-galactosamine:polypeptide N-acetylgalactosaminyltransferase 12	230145	chr4 B1
1420499_at	359.009	317.188	555.06	243.462	311.386	422.177	-0.00316166	-0.173246	0.714098	1.64046	-0.540009	-0.187511	0.336491	1.26268	0	NM_008102	Gch1	GTP cyclohydrolase 1	14528	chr14 C2-3|14 19.5 cM	0006729 // tetrahydrobiopterin biosynthetic process // inferred by curator /// 0006729 // tetrahydrobiopterin biosynthetic process // inferred from electronic annotation /// 0006917 // induction of apoptosis // inferred from electronic annotation /// 0008217 // regulation of blood pressure // inferred from mutant phenotype /// 0014916 // regulation of lung blood pressure // inferred from mutant p…
1424296_at	2875.08	2556.08	3541.63	1223.95	1325.68	2208.63	-0.00115482	-0.152326	0.38394	1.3049	-1.21389	-1.09925	-0.278647	0.824364	0	NM_010295	Gclc	glutamate-cysteine ligase, catalytic subunit	14629	chr9 D-E|9 42.0 cM	0006534 // cysteine metabolic process // inferred from electronic annotation /// 0006534 // cysteine metabolic process // inferred from sequence or structural similarity /// 0006536 // glutamate metabolic process // inferred from electronic annotation /// 0006536 // glutamate metabolic process // inferred from sequence or structural similarity /// 0006749 // glutathione metabolic process // infer…
1448766_at	40.0219	45.3315	543.64	26.9576	33.6246	229.848	-0.030259	0.195337	3.8496	14.416	-0.545418	-0.232166	2.61964	6.14596	0	NM_008124	Gjb1	gap junction protein, beta 1	14618	chrX D-F4|X 41.0 cM	0007154 // cell communication // inferred from electronic annotation	Calcium_regulation_in_cardiac_cells // GenMAPP
1448767_s_at	121.847	192.873	1490.23	87.6756	105.115	679.55	-0.0138313	0.65392	3.69543	12.9549	-0.470574	-0.191984	2.58372	5.99482	0	NM_008124	Gjb1	gap junction protein, beta 1	14618	chrX D-F4|X 41.0 cM	0007154 // cell communication // inferred from electronic annotation	Calcium_regulation_in_cardiac_cells // GenMAPP
1424108_at	638.182	638.615	882.538	1417.45	1383.26	1543.88	-0.00133987	0.0207357	0.555001	1.46917	1.17473	1.13703	1.37838	2.59976	0	NM_001113560 /// NM_025374	Glo1	glyoxalase 1	109801	chr17 A3.3|17 16.0 cM	0006916 // anti-apoptosis // inferred from electronic annotation /// 0006916 // anti-apoptosis // inferred from sequence or structural similarity
1455726_at	278.374	324.319	1578.89	263.111	305.195	1107.33	-2.61778e-05	0.238156	2.58997	6.02086	-0.0596042	0.147014	2.09172	4.26256	0	NM_001033236	Gm71	gene model 71, (NCBI)	207965	chr12 C2
1415698_at	827.311	980.99	6727.63	789.109	959.759	4820.78	-0.0024226	0.263645	3.10938	8.63011	-0.0425067	0.234792	2.64315	6.24694	0	NM_001035122 /// NM_027307	Golm1	golgi membrane protein 1	105348	chr13 B3
1439489_at	240.683	243.744	412.085	151.386	203.964	294.81	-0.00509257	0.0356373	0.860498	1.81567	-0.645346	-0.219973	0.394654	1.31463	0	NM_181748	Gpr120	G protein-coupled receptor 120	107221	chr19 C2-C3	0007165 // signal transduction // inferred from electronic annotation /// 0007186 // G-protein coupled receptor protein signaling pathway // inferred from direct assay /// 0007186 // G-protein coupled receptor protein signaling pathway // inferred from electronic annotation /// 0046879 // hormone secretion // inferred from direct assay
1449279_at	628.645	569.031	453.013	154.972	161.826	109.029	-0.0142107	-0.12859	-0.387751	0.76432	-1.99829	-1.94007	-2.42786	0.185841	0	NM_030677	Gpx2	glutathione peroxidase 2	14776	chr12 C3|12 36.0 cM	0001659 // temperature homeostasis // inferred from genetic interaction /// 0002862 // negative regulation of inflammatory response to antigenic stimulus // inferred from genetic interaction /// 0006979 // response to oxidative stress // inferred from electronic annotation /// 0009609 // response to symbiotic bacterium // inferred from genetic interaction /// 0051702 // interaction with symbiont …
1423437_at	304.424	313.535	91.5016	135.167	131.583	65.5631	-0.000948106	0.0523683	-1.6599	0.316461	-1.14803	-1.19083	-2.11613	0.230665	0	NM_001077353 /// NM_010356	Gsta3	glutathione S-transferase, alpha 3	14859	chr1 A4|1 15.0 cM	0008152 // metabolic process // inferred from electronic annotation
1416416_x_at	6363.17	5826.19	2970.36	2990.29	2696.42	1257.97	-0.000306674	-0.107393	-1.01352	0.495336	-1.06477	-1.22195	-2.23709	0.212113	0	NM_010358	Gstm1	glutathione S-transferase, mu 1	14862	chr3 F2.3	0008152 // metabolic process // inferred from electronic annotation
1425627_x_at	1018.13	971.798	513.333	529.928	483.236	277.711	-0.0147482	-0.0596736	-0.903125	0.534727	-0.919455	-1.05785	-1.77272	0.292657	0	NM_010358	Gstm1	glutathione S-transferase, mu 1	14862	chr3 F2.3	0008152 // metabolic process // inferred from electronic annotation
1416411_at	3718.21	3680.34	2444.97	2729.67	2559.49	1587.34	-0.000796358	0.00268937	-0.518796	0.697954	-0.42249	-0.518795	-1.12787	0.45759	0	NM_008183	Gstm2	glutathione S-transferase, mu 2	14863	chr3 F2.3	0008152 // metabolic process // inferred from electronic annotation
1449575_a_at	8892.42	8727.37	9518.91	7601.48	8005.25	7301.71	-0.000935563	-0.00726156	0.185544	1.13725	-0.200776	-0.131193	-0.181218	0.881958	0	NM_013541	Gstp1	glutathione S-transferase, pi 1	14870	chr19 A|19 0.0 cM	0006749 // glutathione metabolic process // inferred from direct assay /// 0008152 // metabolic process // inferred from electronic annotation	Circadian_Exercise // GenMAPP
1418186_at	2238.95	2448.48	4145.27	2124.04	2377.98	3038.83	-0.00182082	0.146704	0.974599	1.96509	-0.0518463	0.106491	0.542449	1.45644	0	NM_008185	Gstt1	glutathione S-transferase, theta 1	14871	chr10 B5-C1|10 40.7 cM	0006749 // glutathione metabolic process // inferred from direct assay
1423891_at	613.133	626.007	1866.65	498.323	554.761	1300.67	-0.00332402	0.0449574	1.69119	3.22924	-0.274878	-0.124029	1.18772	2.27792	0	NM_133994	Gstt3	glutathione S-transferase, theta 3	103140	chr10 C1	0006749 // glutathione metabolic process // inferred from direct assay
1434290_at	231.085	213.452	151.715	269.164	242.087	173.44	-4.71313e-05	-0.0952562	-0.522565	0.696133	0.244978	0.0825097	-0.310976	0.806096	0	NM_172662	Gtdc1	glycosyltransferase-like domain containing 1	227835	chr2 B	0009058 // biosynthetic process // inferred from electronic annotation
1431833_a_at	244.726	157.185	100.471	127.911	136.246	88.7528	-0.0096731	-0.629852	-1.20156	0.434806	-0.910765	-0.828338	-1.36706	0.387681	0	NM_008256	Hmgcs2	3-hydroxy-3-methylglutaryl-Coenzyme A synthase 2	15360	chr3 F2.2|3 48.0 cM	0006694 // steroid biosynthetic process // inferred from electronic annotation /// 0006695 // cholesterol biosynthetic process // inferred from electronic annotation /// 0007584 // response to nutrient // inferred from electronic annotation /// 0008152 // metabolic process // inferred from electronic annotation /// 0008299 // isoprenoid biosynthetic process // inferred from electronic annotation …
1428662_a_at	11225.6	9548.31	3597.49	11657	10239.7	5453.48	-0.000161964	-0.213881	-1.561	0.338916	0.0792969	-0.112217	-0.939854	0.521286	0	NM_001159900 /// NM_001159901 /// NM_175606	Hopx	HOP homeobox	74318	chr5 C3.3	0000122 // negative regulation of transcription from RNA polymerase II promoter // inferred from direct assay /// 0000122 // negative regulation of transcription from RNA polymerase II promoter // inferred from genetic interaction /// 0001829 // trophectodermal cell differentiation // inferred from mutant phenotype /// 0001829 // trophectodermal cell differentiation // not recorded /// 0001829 //…
1448286_at	1019.31	1126.11	2607.24	1048.32	1058.91	1949.43	-0.00089776	0.162473	1.44175	2.71651	0.0631992	0.073204	1.03775	2.05302	0	NM_016763	Hsd17b10	hydroxysteroid (17-beta) dehydrogenase 10	15108	chrX F3	0008033 // tRNA processing // inferred from electronic annotation /// 0008152 // metabolic process // inferred from electronic annotation /// 0055114 // oxidation reduction // inferred from electronic annotation
1431059_x_at	142.387	121.637	100.423	167.918	150.516	127.689	-0.00266774	-0.268994	-0.419779	0.747539	0.262108	0.0973817	-0.056889	0.961335	0	NM_028242	Htatsf1	HIV TAT specific factor 1	72459	chrX A4	0006350 // transcription // inferred from electronic annotation /// 0006355 // regulation of transcription, DNA-dependent // inferred from electronic annotation
1419192_at	156.196	150.806	1020.49	123.762	132.201	423.987	-0.0271885	-0.0583653	2.79357	6.93342	-0.312491	-0.230063	1.5301	2.88806	0	NM_010215	Il4i1	interleukin 4 induced 1	14204	chr7 B4|7 23.1 cM	0009072 // aromatic amino acid family metabolic process // inferred from direct assay /// 0032313 // regulation of Rab GTPase activity // inferred from electronic annotation /// 0055114 // oxidation reduction // inferred from electronic annotation
1441416_at	31.7094	33.3313	65.2269	26.3979	28.0465	34.6358	-0.0139288	0.090252	1.12205	2.17657	-0.241009	-0.157355	0.229999	1.17283	0	NM_001024617	Inpp4b	inositol polyphosphate-4-phosphatase, type II	234515	chr8 C2|8 38.0 cM	0048016 // inositol phosphate-mediated signaling // not recorded
1456412_a_at	1163.61	1001.81	740.176	1341.61	1228.32	969.085	-0.00183177	-0.19864	-0.571405	0.672961	0.229509	0.0965395	-0.160879	0.89448	0	NM_008916	Inpp5k	inositol polyphosphate 5-phosphatase K	19062	chr11 B5|11 44.12 cM
1456498_at	118.405	118.792	38.7912	312.627	297.243	119.903	-0.0761557	-0.035039	-1.66527	0.315286	1.42149	1.34339	0.0737244	1.05243	0	NM_010576	Itga4	integrin alpha 4	16401	chr2 C3|2 46.0 cM	0001974 // blood vessel remodeling // inferred from mutant phenotype /// 0007155 // cell adhesion // inferred from mutant phenotype /// 0007155 // cell adhesion // inferred from electronic annotation /// 0007157 // heterophilic cell adhesion // inferred from mutant phenotype /// 0007159 // leukocyte adhesion // inferred from mutant phenotype /// 0007229 // integrin-mediated signaling pathway // i…	Integrin-mediated_cell_adhesion_KEGG // GenMAPP
1460203_at	1303.8	1161.54	1152.25	1171.39	1060.21	914.046	-0.00120939	-0.149154	-0.0917706	0.93837	-0.130371	-0.279089	-0.409412	0.75293	0	NM_010585	Itpr1	inositol 1,4,5-triphosphate receptor 1	16438	chr6 E1-E2|6 48.0 cM	0001666 // response to hypoxia // inferred from direct assay /// 0006810 // transport // inferred from electronic annotation /// 0006811 // ion transport // inferred from electronic annotation /// 0006816 // calcium ion transport // inferred from direct assay /// 0006816 // calcium ion transport // inferred from electronic annotation /// 0009791 // post-embryonic development // inferred from muta…	Calcium_regulation_in_cardiac_cells // GenMAPP /// G_Protein_Signaling // GenMAPP /// Smooth_muscle_contraction // GenMAPP
1439878_at	24.6503	29.0314	234.557	26.1317	25.1436	66.8839	-0.000200461	0.251344	3.33494	10.0906	0.0994624	0.048792	1.54211	2.91221	0	NM_008412	Ivl	involucrin	16447	chr3 F1|3 45.2 cM	0030216 // keratinocyte differentiation // inferred from electronic annotation /// 0031424 // keratinization // inferred from electronic annotation
1450747_at	390.414	346.52	446.185	322.863	369.404	310.946	-0.000349748	-0.15391	0.277853	1.21239	-0.254282	-0.0596691	-0.224977	0.855609	0	NM_001110305 /// NM_001110306 /// NM_001110307 /// NM_016679	Keap1	kelch-like ECH-associated protein 1	50868	chr9 A3	0001701 // in utero embryonic development // inferred from mutant phenotype /// 0006350 // transcription // inferred from electronic annotation /// 0006355 // regulation of transcription, DNA-dependent // inferred from electronic annotation /// 0045449 // regulation of transcription // inferred from mutant phenotype /// 0045604 // regulation of epidermal cell differentiation // inferred from muta…
1448269_a_at	526.287	551.963	1281.16	483.101	478.557	544.478	-0.00637471	0.0826372	1.37063	2.58584	-0.104681	-0.128564	0.152608	1.11158	0	NM_026167	Klhl13	kelch-like 13 (Drosophila)	67455	chrX A2	0019941 // modification-dependent protein catabolic process // inferred from electronic annotation
1418449_at	154.012	145.635	736.148	111.232	127.605	478.647	-0.0118554	-0.0889261	2.34312	5.07399	-0.455366	-0.252426	1.74069	3.34195	0	NM_133664	Lad1	ladinin	16763	chr1 E4
1452266_at	621.182	608.639	1852.4	624.168	591.547	1111.47	-0.00312216	-0.00938339	1.65828	3.15641	0.0308948	-0.0499197	0.941411	1.92041	0	NM_152822	Las1l	LAS1-like (S. cerevisiae)	76130	chrX C3
1422662_at	822.759	790.239	1028.6	1057.93	1084.34	1197.58	-0.00122669	-0.0437637	0.40846	1.32727	0.385676	0.418143	0.643093	1.56167	0	NM_018886	Lgals8	lectin, galactose binding, soluble 8	56048	chr13 A1|13 8.0 cM	0006816 // calcium ion transport // inferred from electronic annotation /// 0007154 // cell communication // inferred from electronic annotation
1454086_a_at	1957.9	2009.31	582.337	2518.3	2486.75	1007.19	-0.000464869	0.0562731	-1.66484	0.315379	0.385599	0.361651	-0.858375	0.551574	0	NM_001142335 /// NM_001142336 /// NM_001142337 /// NM_008505 /// XM_001479884	Lmo2	LIM domain only 2	16909	chr2 E2|2 60.0 cM	0045647 // negative regulation of erythrocyte differentiation // inferred from mutant phenotype
1448786_at	1155.52	1120.95	1740.2	783.571	990.127	1069.95	-0.00581197	-0.0247888	0.67827	1.60022	-0.537172	-0.203329	-0.00723207	0.995	0	NM_025806 /// XM_001473518	LOC100045163 /// Plbd1	similar to RIKEN cDNA 1100001H23 gene /// phospholipase B domain containing 1	100045163 /// 66857	chr6 G1	0016042 // lipid catabolic process // inferred from electronic annotation
1418932_at	103.701	96.6495	339.144	59.2831	60.6538	115.184	-0.0337506	-0.115339	1.77954	3.43316	-0.785865	-0.753785	0.249358	1.18868	0	NM_017373 /// XM_001475817	LOC100046232 /// Nfil3	similar to NFIL3/E4BP4 transcription factor /// nuclear factor, interleukin 3, regulated	100046232 /// 18030	chr13 B1|13 32.0 cM	0006350 // transcription // inferred from electronic annotation /// 0006355 // regulation of transcription, DNA-dependent // inferred from electronic annotation /// 0048511 // rhythmic process // inferred from electronic annotation
1421816_at	401.059	370.355	607.904	288.289	293.028	429.525	-0.000671982	-0.0960743	0.684636	1.6073	-0.452251	-0.432499	0.199298	1.14814	0	XM_904332	LOC630729	similar to Glutathione reductase, mitochondrial precursor (GR) (GRase)	630729		0006749 // glutathione metabolic process // inferred by curator /// 0006749 // glutathione metabolic process // inferred from electronic annotation /// 0045454 // cell redox homeostasis // inferred from electronic annotation /// 0055114 // oxidation reduction // inferred from electronic annotation
1415922_s_at	278.251	274.27	1274.42	257.482	320.54	763.063	-0.000282522	-0.0477257	2.28124	4.86095	-0.0952975	0.222215	1.54765	2.9234	0	NM_010807	Marcksl1	MARCKS-like 1	17357	chr4 D2.2|4 59.0 cM	0008284 // positive regulation of cell proliferation // inferred from direct assay
1437226_x_at	499.371	519.718	1641.25	435.469	546.138	1068.75	-0.000366749	0.0688934	1.79962	3.48129	-0.177228	0.146868	1.19655	2.29191	0	NM_010807	Marcksl1	MARCKS-like 1	17357	chr4 D2.2|4 59.0 cM	0008284 // positive regulation of cell proliferation // inferred from direct assay
1421903_at	177.988	180.331	268.634	172.931	184.372	199.937	-0.000144102	0.0374877	0.680194	1.60235	-0.0211866	0.0701493	0.271152	1.20677	0	NM_026042	Med29	mediator complex subunit 29	67224	chr7 A3	0006350 // transcription // inferred from electronic annotation /// 0006355 // regulation of transcription, DNA-dependent // inferred from electronic annotation
1447861_x_at	99.5494	128.625	63.4245	127.623	134.684	101.746	-0.00170037	0.387589	-0.569854	0.673685	0.382748	0.4553	0.129591	1.09398	0	NM_001136072 /// NM_001159567 /// NM_001159568 /// NM_001159569 /// NM_001159570 /// NM_010825	Meis2	Meis homeobox 2	17536	chr2 E4-E5|2 64.0 cM	0001654 // eye development // inferred from genetic interaction /// 0006355 // regulation of transcription, DNA-dependent // inferred from electronic annotation /// 0045449 // regulation of transcription // inferred from electronic annotation /// 0045944 // positive regulation of transcription from RNA polymerase II promoter // inferred from genetic interaction
1434436_at	99.5574	84.8884	268.661	89.8235	73.4753	107.649	-0.00948363	-0.234628	1.51308	2.85418	-0.145035	-0.444538	0.213336	1.15937	0	NM_029413	Morc4	microrchidia 4	75746	chrX F1
1448799_s_at	793.014	820.887	1194.58	749.258	760.751	925.5	-0.00340967	0.0683675	0.678154	1.60009	-0.057759	-0.0392987	0.326367	1.25385	0	NM_011885	Mrps12	mitochondrial ribosomal protein S12	24030	chr7 A3	0006412 // translation // inferred from electronic annotation	Apoptosis // GenMAPP
1424433_at	361.503	380.638	654.579	322.726	335.819	427.926	-0.00408443	0.0927376	0.94387	1.92368	-0.138925	-0.088126	0.34525	1.27037	0	NM_029619	Msrb2	methionine sulfoxide reductase B2	76467	chr2 A2	0030091 // protein repair // inferred from direct assay /// 0055114 // oxidation reduction // inferred from electronic annotation
1451346_at	244.565	255.643	523.913	256.175	271.705	397.819	-0.00130776	0.0761502	1.18548	2.27438	0.0922877	0.171036	0.804318	1.74632	0	NM_024433	Mtap	methylthioadenosine phosphorylase	66902	chr4 C4	0009116 // nucleoside metabolic process // inferred from electronic annotation
1427398_at	71.8343	59.8301	188.484	36.4488	48.0071	102.252	-0.0469239	-0.270261	1.47015	2.77051	-0.957699	-0.560469	0.613726	1.53021	0	NM_080457	Muc4	mucin 4	140474	chr16 B3	0007155 // cell adhesion // inferred from electronic annotation /// 0007160 // cell-matrix adhesion // inferred from electronic annotation
1417773_at	555.918	592.201	1066	491.962	555.016	772.777	-0.00324431	0.107584	1.0261	2.03652	-0.153642	0.0147001	0.576721	1.49146	0	NM_053179	Nans	N-acetylneuraminic acid synthase (sialic acid synthase)	94181	chr4 B2	0008152 // metabolic process // inferred from electronic annotation /// 0016051 // carbohydrate biosynthetic process // inferred from electronic annotation
1416494_at	1611	1636.65	1810.6	820.656	757.195	780.973	-0.00266349	0.0370986	0.255142	1.19345	-0.948941	-1.06874	-0.945132	0.519382	0	NM_001030274	Ndufs5	NADH dehydrogenase (ubiquinone) Fe-S protein 5	595136	chr4 D2	0006810 // transport // inferred from electronic annotation /// 0022900 // electron transport chain // inferred from electronic annotation /// 0032981 // mitochondrial respiratory chain complex I assembly // inferred from electronic annotation
1451503_at	267.737	311.895	359.158	310.749	334.566	254.556	-0.00108254	0.236455	0.510784	1.42482	0.240199	0.342185	0.0297071	1.0208	0	NM_030152	Nol3	nucleolar protein 3 (apoptosis repressor with CARD domain)	78688	chr8 D1|8 51.0 cM	0001666 // response to hypoxia // inferred from electronic annotation /// 0006397 // mRNA processing // inferred from electronic annotation /// 0008380 // RNA splicing // inferred from electronic annotation /// 0042981 // regulation of apoptosis // inferred from electronic annotation
1425151_a_at	208.738	222.546	950.986	155.623	184.458	412.546	-0.00441982	0.10344	2.26374	4.80234	-0.408621	-0.157012	1.08444	2.12056	0	NM_027988	Noxo1	NADPH oxidase organizer 1	71893	chr17 A3.3|17 10.0 cM	0006801 // superoxide metabolic process // inferred from direct assay /// 0007154 // cell communication // inferred from electronic annotation
1452106_at	6351.51	5912.96	2053.66	6928.71	7548.62	3863.69	-9.21407e-05	-0.0837472	-1.5517	0.341108	0.14811	0.267847	-0.617367	0.651859	0	NM_001029836 /// NM_033525	Npnt	nephronectin	114249	chr3 G3	0001657 // ureteric bud development // inferred from mutant phenotype /// 0001658 // ureteric bud branching // inferred from mutant phenotype /// 0007155 // cell adhesion // inferred from electronic annotation /// 0007160 // cell-matrix adhesion // inferred from direct assay /// 0007160 // cell-matrix adhesion // inferred from physical interaction /// 0007275 // multicellular organismal developme…
1449716_s_at	471.665	395.037	344.161	188.675	187.056	166.051	-0.00593287	-0.251346	-0.371792	0.772822	-1.29961	-1.31529	-1.40463	0.377716	0	NM_146150	Nrd1	nardilysin, N-arginine dibasic convertase, NRD convertase 1	230598	chr4 C7	0006508 // proteolysis // inferred from electronic annotation
1433788_at	27.2738	30.4395	30.394	32.5275	31.0946	35.8769	-0.00171062	0.176958	0.243508	1.18387	0.277848	0.207748	0.499054	1.41329	0	NM_172544	Nrxn3	neurexin III	18191	chr12D2|12 45.0 cM	0007268 // synaptic transmission // inferred from genetic interaction /// 0007269 // neurotransmitter secretion // inferred from genetic interaction /// 0007416 // synaptogenesis // inferred from genetic interaction
1455663_at	155.895	177.288	49.2439	193.749	182.199	82.5559	-0.00424493	0.199792	-1.58193	0.334034	0.334375	0.243749	-0.814453	0.568624	0	NM_172907	Olfml1	olfactomedin-like 1	244198	chr7 E3
1424990_at	884.4	809.999	1225.84	776.832	902.736	957.243	-0.000990115	-0.109366	0.558126	1.47236	-0.162425	0.0501325	0.217312	1.16257	0	NM_175423	Orai1	ORAI calcium release-activated calcium modulator 1	109305	chr5 F	0006810 // transport // inferred from electronic annotation /// 0006811 // ion transport // inferred from electronic annotation /// 0006816 // calcium ion transport // inferred from electronic annotation /// 0006955 // immune response // inferred from electronic annotation /// 0051928 // positive regulation of calcium ion transport // inferred from electronic annotation /// 0051928 // positive re…
1434763_at	111.367	93.7127	148.216	92.5793	108.183	92.7602	-0.00483128	-0.274449	0.491996	1.40639	-0.242369	-0.0208391	-0.159876	0.895102	0	NM_178751	Orai2	ORAI calcium release-activated calcium modulator 2	269717	chr5 G2
1443939_at	306.485	289.782	207.823	491.891	535.272	251.476	-0.00806267	-0.0671247	-0.474294	0.719819	0.70668	0.816735	-0.185828	0.879144	0	NM_001085549 /// XM_981216	OTTMUSG00000008561	predicted gene, OTTMUSG00000008561	666048	chr4 D1|4
1449187_at	934.736	936.273	524.073	1095.31	1258.28	748.652	-0.000312551	0.0125324	-0.75004	0.594587	0.252781	0.449007	-0.218098	0.859698	0	NM_008808	Pdgfa	platelet derived growth factor, alpha	18590	chr5 G2|5 82.0 cM	0001525 // angiogenesis // inferred from direct assay /// 0001666 // response to hypoxia // inferred from electronic annotation /// 0001942 // hair follicle development // inferred from mutant phenotype /// 0002053 // positive regulation of mesenchymal cell proliferation // inferred from mutant phenotype /// 0007179 // transforming growth factor beta receptor signaling pathway // inferred from el…
1449184_at	608.395	447.71	2191.4	255.316	326.258	1035.48	-0.173749	-0.511659	1.93743	3.83022	-1.2253	-0.882165	0.873739	1.83241	0	NM_009402	Pglyrp1	peptidoglycan recognition protein 1	21946	chr7 A3	0006915 // apoptosis // inferred from electronic annotation /// 0006955 // immune response // inferred from electronic annotation /// 0009253 // peptidoglycan catabolic process // inferred from electronic annotation /// 0016045 // detection of bacterium // inferred from electronic annotation /// 0042742 // defense response to bacterium // inferred from electronic annotation /// 0050830 // defense…
1449488_at	56.3848	95.6768	66.1627	63.0165	65.6216	77.2477	-0.00158063	0.570832	0.316965	1.24571	0.185415	0.235827	0.5576	1.47182	0	NM_011097	Pitx1	paired-like homeodomain transcription factor 1	18740	chr13 B1|13 34.0 cM	0001501 // skeletal system development // inferred from mutant phenotype /// 0006350 // transcription // inferred from electronic annotation /// 0006355 // regulation of transcription, DNA-dependent // inferred from electronic annotation /// 0007275 // multicellular organismal development // inferred from electronic annotation /// 0014707 // branchiomeric skeletal muscle development // inferred f…
1421137_a_at	55.3448	62.0241	327.346	60.3802	79.7438	484.469	-0.00894684	0.0853577	2.64915	6.27296	0.147067	0.524673	3.22963	9.38027	0	NM_001039050 /// NM_001039051 /// NM_001039052 /// NM_001039053 /// NM_008863	Pkib	protein kinase inhibitor beta, cAMP dependent, testis specific	18768	chr10 B4|10 30.0 cM	0006469 // negative regulation of protein kinase activity // inferred from electronic annotation	Calcium_regulation_in_cardiac_cells // GenMAPP /// Smooth_muscle_contraction // GenMAPP
1430700_a_at	416.779	334.627	862.476	279.836	320.948	416.042	-0.00925886	-0.299209	1.12272	2.17758	-0.55269	-0.374214	0.0957611	1.06863	0	NM_013737	Pla2g7	phospholipase A2, group VII (platelet-activating factor acetylhydrolase, plasma)	27226	chr17 C	0006954 // inflammatory response // traceable author statement /// 0016042 // lipid catabolic process // inferred from electronic annotation
1457157_at	60.1938	53.695	83.8097	52.9696	52.3269	41.6145	-0.000353967	-0.157658	0.562699	1.47703	-0.179411	-0.198775	-0.431084	0.741704	0	NM_183191	Plch1	phospholipase C, eta 1	269437	chr3 E1	0006629 // lipid metabolic process // inferred from electronic annotation /// 0007165 // signal transduction // inferred from electronic annotation /// 0007242 // intracellular signaling cascade // inferred from electronic annotation /// 0016042 // lipid catabolic process // inferred from electronic annotation /// 0048015 // phosphoinositide-mediated signaling // not recorded
1436821_at	138.717	108.404	35.8176	213.433	194.853	58.129	-0.00710806	-0.524074	-1.86887	0.273788	0.645733	0.507341	-1.15839	0.448012	0	NM_177355	Plcxd3	phosphatidylinositol-specific phospholipase C, X domain containing 3	239318	chr15 A1	0006629 // lipid metabolic process // inferred from electronic annotation /// 0007165 // signal transduction // inferred from electronic annotation /// 0007242 // intracellular signaling cascade // inferred from electronic annotation /// 0016042 // lipid catabolic process // inferred from electronic annotation
1441371_at	162.553	179.311	336.705	166.649	181.706	243.211	-5.44724e-05	0.156088	1.13606	2.1978	0.0580389	0.180551	0.683575	1.60611	0	NM_175750	Plxna4	plexin A4	243743	chr6 B1	0007165 // signal transduction // inferred from genetic interaction /// 0007165 // signal transduction // inferred from electronic annotation /// 0007275 // multicellular organismal development // inferred from electronic annotation /// 0007399 // nervous system development // inferred from genetic interaction
1417041_at	633.589	686.291	1486.71	592.266	607.075	1233.44	-0.000334434	0.134248	1.31735	2.49208	-0.072306	-0.0420325	1.06413	2.09091	0	NM_009085	Polr1c	polymerase (RNA) I polypeptide C	20016	chr17 C	0006350 // transcription // inferred from electronic annotation	RNA_transcription_Reactome // GenMAPP
1439075_at	197.263	163.348	145.404	339.652	274.223	220.563	-0.00919517	-0.276683	-0.355819	0.781426	0.799206	0.491118	0.259712	1.19724	0	NM_029763	Polr3f	polymerase (RNA) III (DNA directed) polypeptide F	70408	chr2 H1	0006350 // transcription // inferred from electronic annotation
1422753_a_at	198.84	210.093	293.934	161.111	179.917	203.727	-0.000434104	0.0872866	0.650599	1.56982	-0.287157	-0.126109	0.133955	1.0973	0	NM_025901	Polr3k	polymerase (RNA) III (DNA directed) polypeptide K	67005	chr2 H4	0006350 // transcription // inferred from electronic annotation /// 0045449 // regulation of transcription // inferred from electronic annotation	RNA_transcription_Reactome // GenMAPP
1451210_at	528.775	599.168	2094.26	491.286	558.797	1390.48	-0.00226718	0.199639	2.07289	4.20729	-0.0810804	0.0998482	1.49815	2.82481	0	NM_015817	Ppap2c	phosphatidic acid phosphatase type 2C	50784	chr10 C1|10 42.0 cM
1431506_s_at	508.593	450.927	595.519	224.063	240.474	274.099	-0.00172132	-0.156766	0.310499	1.24014	-1.1621	-1.06683	-0.792242	0.577446	0	NM_001110129 /// NM_001110130 /// NM_028677	Ppih	peptidyl prolyl isomerase H	66101	chr4 D	0006397 // mRNA processing // inferred from electronic annotation /// 0006457 // protein folding // inferred from electronic annotation /// 0008380 // RNA splicing // inferred from electronic annotation
1450914_at	891.059	975.358	2413.75	852.255	906.938	1768.31	-0.00300862	0.148421	1.52272	2.87331	-0.0432871	0.0455314	1.09153	2.13101	0	NM_008889	Ppp1r14b	protein phosphatase 1, regulatory (inhibitor) subunit 14B	18938	chr19 A	0042325 // regulation of phosphorylation // inferred from electronic annotation	mRNA_processing_binding_Reactome // GenMAPP
1422467_at	1617.24	1670.33	1576.15	1701.64	1881	2267.13	-0.00243877	0.0606242	0.0490705	1.0346	0.0937377	0.235034	0.589403	1.50462	0	NM_008917	Ppt1	palmitoyl-protein thioesterase 1	19063	chr4 D1-D3|4 59.1 cM	0002084 // protein depalmitoylation // inferred from mutant phenotype /// 0002084 // protein depalmitoylation // inferred from sequence or structural similarity /// 0006309 // DNA fragmentation involved in apoptosis // inferred from sequence or structural similarity /// 0006464 // protein modification process // inferred from electronic annotation /// 0006898 // receptor-mediated endocytosis // n…
1423223_a_at	10050.7	9399.39	3676.76	6626.55	6513.24	3825.93	-0.00296093	-0.0785464	-1.3648	0.388289	-0.575568	-0.605388	-1.2896	0.409065	0	NM_007453	Prdx6	peroxiredoxin 6	11758	chr1 H2.1|1 83.6 cM	0000302 // response to reactive oxygen species // inferred from mutant phenotype /// 0016042 // lipid catabolic process // inferred from electronic annotation /// 0032060 // bleb formation // inferred from mutant phenotype /// 0045454 // cell redox homeostasis // inferred from electronic annotation /// 0055114 // oxidation reduction // inferred from electronic annotation
1451064_a_at	159.901	185.558	789.067	158.706	212.902	550.1	-0.00368818	0.22933	2.38885	5.23741	-0.000783538	0.431754	1.88409	3.69119	0	NM_177420	Psat1	phosphoserine aminotransferase 1	107272	chr19 A|19 32.5 cM	0006564 // L-serine biosynthetic process // inferred from electronic annotation /// 0008152 // metabolic process // inferred from electronic annotation /// 0008652 // amino acid biosynthetic process // inferred from electronic annotation
1452029_a_at	64.756	66.178	63.817	72.4213	67.4324	78.0703	-6.67957e-05	0.0508618	0.0637714	1.04519	0.186026	0.0775203	0.371602	1.29379	0	NM_001098233 /// NM_152821	Purg	purine-rich element binding protein G	75029	chr8 A4
1423903_at	411.693	435.908	1094.68	403.827	429.915	767.899	-0.00249905	0.0916762	1.49579	2.82019	-0.0029513	0.0825107	0.998901	1.99848	0	NM_027514	Pvr	poliovirus receptor	52118	chr7 A3|7 4.0 cM	0016337 // cell-cell adhesion // inferred from direct assay /// 0016477 // cell migration // inferred from direct assay
1451160_s_at	613.228	798.985	1693.45	607.927	698.303	1201.04	-0.00315083	0.400791	1.55123	2.93068	0.0120829	0.205469	1.07035	2.09994	0	NM_027514	Pvr	poliovirus receptor	52118	chr7 A3|7 4.0 cM	0016337 // cell-cell adhesion // inferred from direct assay /// 0016477 // cell migration // inferred from direct assay
1451690_a_at	92.6304	82.3018	171.118	80.142	88.2006	113.699	-0.00579117	-0.172519	0.971339	1.96066	-0.184009	-0.0505227	0.396408	1.31623	0	NM_001122680 /// NM_027893	Pvrl4	poliovirus receptor-related 4	71740		0007155 // cell adhesion // inferred from electronic annotation /// 0016337 // cell-cell adhesion // not recorded
1422547_at	1552.81	1622.92	2143.09	1447.3	1507.7	1808.1	-0.000365929	0.0763813	0.550746	1.46484	-0.076791	-0.0221185	0.322892	1.25084	0	NM_011239	Ranbp1	RAN binding protein 1	19385	chr16 A3|16 10.9 cM	0007051 // spindle organization // inferred from direct assay /// 0046604 // positive regulation of mitotic centrosome separation // inferred from direct assay /// 0046907 // intracellular transport // inferred from electronic annotation
1429444_at	416.572	464.702	1296.88	220.628	231.638	640.973	-0.0350346	0.175586	1.72468	3.30506	-0.906177	-0.827557	0.711206	1.63717	0	NM_026864	Rasl11a	RAS-like, family 11, member A	68895	chr5 G3	0007264 // small GTPase mediated signal transduction // inferred from electronic annotation
1427963_s_at	26.849	21.4556	330.058	24.739	29.0851	135.142	-0.0124771	-0.304235	3.7013	13.0078	-0.096777	0.136823	2.41518	5.33386	0	NM_153133	Rdh9	retinol dehydrogenase 9	103142	chr10 D3	0001523 // retinoid metabolic process // inferred from direct assay /// 0008152 // metabolic process // inferred from electronic annotation /// 0008202 // steroid metabolic process // inferred from direct assay /// 0042904 // 9-cis-retinoic acid biosynthetic process // inferred from direct assay /// 0055114 // oxidation reduction // inferred from electronic annotation
1416229_at	1787.25	1580.15	4085.92	1295.45	1335.32	2557.1	-0.00409805	-0.174505	1.2768	2.423	-0.450448	-0.403328	0.619567	1.53641	0	NM_019437	Rfk	riboflavin kinase	54391	chr19 B	0009231 // riboflavin biosynthetic process // inferred from electronic annotation
1436876_at	158.229	157.945	261.51	165.515	179.903	175.059	-9.03271e-05	0.0128193	0.811086	1.75453	0.0886634	0.201429	0.249001	1.18838	0	NM_029879	Rgs7bp	regulator of G-protein signalling 7 binding protein	52882	chr13 D1|13 57.0 cM	0007186 // G-protein coupled receptor protein signaling pathway // inferred from direct assay /// 0009968 // negative regulation of signal transduction // inferred from electronic annotation
1442819_at	60.5018	53.6166	232.197	42.1711	48.3782	53.8745	-0.0150219	-0.181556	2.0287	4.08038	-0.500036	-0.300583	-0.064272	0.956428	0	NM_183163	Rhbdl2	rhomboid, veinlet-like 2 (Drosophila)	230726	chr4 D2.2	0007165 // signal transduction // inferred from electronic annotation
1449027_at	291.264	249.161	778.936	189.523	174.841	498.109	-0.00459748	-0.206117	1.50034	2.8291	-0.603992	-0.723019	0.876872	1.83639	0	NM_133955	Rhou	ras homolog gene family, member U	69581	chr8 E2	0000082 // G1/S transition of mitotic cell cycle // inferred from direct assay /// 0007264 // small GTPase mediated signal transduction // inferred from electronic annotation /// 0008360 // regulation of cell shape // inferred from direct assay /// 0016601 // Rac protein signal transduction // inferred from direct assay /// 0030036 // actin cytoskeleton organization // inferred from direct assay
1452734_at	6590.81	7241.42	12164.6	5805.1	6527.63	11086.9	-7.5149e-05	0.155616	0.971182	1.96045	-0.157895	0.0066394	0.853833	1.8073	0	NM_001083938 /// NM_026611 /// XM_001476345 /// XM_001476365 /// XM_001480967	Rnaset2a /// Rnaset2b	ribonuclease T2A /// ribonuclease T2B	100037283 /// 68195	chr17 B2		mRNA_processing_binding_Reactome // GenMAPP
1423293_at	1081.28	1054.24	924.604	1244.13	1183.88	1045.28	-0.000384304	-0.0192971	-0.139421	0.907884	0.227342	0.150594	0.0537071	1.03793	0	NM_026653	Rpa1	replication protein A1	68275	chr11 B5|11 44.0 cM	0000724 // double-strand break repair via homologous recombination // inferred from mutant phenotype /// 0001701 // in utero embryonic development // inferred from mutant phenotype /// 0006260 // DNA replication // inferred from electronic annotation /// 0007126 // meiosis // inferred from direct assay /// 0008284 // positive regulation of cell proliferation // inferred from mutant phenotype /// …	DNA_replication_Reactome // GenMAPP /// G1_to_S_cell_cycle_Reactome // GenMAPP
1437309_a_at	1837.72	1820.84	1522.04	2047.13	2083.37	1647.98	-3.70025e-05	0.00499768	-0.186259	0.878882	0.180569	0.200321	-0.0542581	0.96309	0	NM_026653	Rpa1	replication protein A1	68275	chr11 B5|11 44.0 cM	0000724 // double-strand break repair via homologous recombination // inferred from mutant phenotype /// 0001701 // in utero embryonic development // inferred from mutant phenotype /// 0006260 // DNA replication // inferred from electronic annotation /// 0007126 // meiosis // inferred from direct assay /// 0008284 // positive regulation of cell proliferation // inferred from mutant phenotype /// …	DNA_replication_Reactome // GenMAPP /// G1_to_S_cell_cycle_Reactome // GenMAPP
1448353_x_at	2747.69	2741.35	3631.89	2358.02	2437.64	2736.62	-0.00284643	0.0150978	0.489398	1.40386	-0.200171	-0.15247	0.0970743	1.0696	0	NM_133933	Rpn1	ribophorin I	103963	chr6 D1|6 38.0 cM	0006486 // protein amino acid glycosylation // inferred from electronic annotation	Proteasome_Degradation // GenMAPP
1455174_at	436.119	445.771	668.477	387.808	424.902	519.548	-0.00247512	0.0518743	0.703553	1.62851	-0.146934	-0.0164179	0.356477	1.2803	0	NM_175109	Rps19bp1	ribosomal protein S19 binding protein 1	66538	chr15 E1
1420431_at	37.7424	20.7107	15.2848	16.0213	17.2053	16.9299	-0.00265039	-0.895093	-1.22016	0.429236	-1.2208	-1.11695	-1.06266	0.478748	0	NM_009100	Rptn	repetin	20129	chr3 F1-F2
1454704_at	6078.33	5952.5	6104.32	6353.26	6386.83	7336.21	-0.000763599	-0.0112842	0.0927671	1.06641	0.0885717	0.0904442	0.37381	1.29577	0	NM_007644	Scarb2	scavenger receptor class B, member 2	12492	chr5 E3	0007155 // cell adhesion // inferred from electronic annotation
1434740_at	1431.9	1449.18	929.712	1417.57	1576.74	1143.43	-0.000107323	0.036621	-0.536051	0.689656	0.00976873	0.159391	-0.221055	0.857938	0	NM_153790	Scarf2	scavenger receptor class F, member 2	224024	chr16 A3	0007155 // cell adhesion // inferred from electronic annotation /// 0007157 // heterophilic cell adhesion // inferred from direct assay
1416778_at	9511.72	9629.73	1770.11	11079.6	10342.2	3926.41	-0.00114311	0.0337127	-2.34379	0.196992	0.243946	0.140992	-1.17547	0.44274	0	NM_138741	Sdpr	serum deprivation response	20324	chr1 C1.1	0045944 // positive regulation of transcription from RNA polymerase II promoter // not recorded
1416168_at	887.814	818.673	2561.14	621.936	654.389	809.339	-0.0161892	-0.117078	1.60758	3.04741	-0.540643	-0.426521	-0.0357472	0.975526	0	NM_011340	Serpinf1	serine (or cysteine) peptidase inhibitor, clade F, member 1	20317	chr11 B5	0016525 // negative regulation of angiogenesis // inferred from direct assay /// 0016525 // negative regulation of angiogenesis // inferred from electronic annotation /// 0050769 // positive regulation of neurogenesis // inferred from sequence or structural similarity /// 0050769 // positive regulation of neurogenesis // inferred from electronic annotation
1426323_x_at	481.649	564.57	1180.34	549.282	618.877	1489.62	-0.00106883	0.246602	1.37949	2.60176	0.211424	0.381508	1.73076	3.31902	0	NM_013929	Siva1	SIVA1, apoptosis-inducing factor	30954	chr12 F2	0006915 // apoptosis // inferred from electronic annotation /// 0043065 // positive regulation of apoptosis // inferred from electronic annotation
1424308_at	594.126	555.129	145.373	796.588	797.415	392.92	-0.011	-0.0785819	-1.94886	0.25902	0.449034	0.446195	-0.497822	0.708175	0	NM_053195	Slc24a3	solute carrier family 24 (sodium/potassium/calcium exchanger), member 3	94249	chr2 H1	0006810 // transport // inferred from electronic annotation /// 0006811 // ion transport // inferred from electronic annotation /// 0006813 // potassium ion transport // inferred from electronic annotation /// 0006814 // sodium ion transport // inferred from electronic annotation /// 0006816 // calcium ion transport // inferred from electronic annotation /// 0006874 // cellular calcium ion homeos…
1419434_at	115.792	82.5702	175.08	93.2695	88.6554	104.505	-0.00160355	-0.489329	0.680477	1.60267	-0.288068	-0.3663	-0.044721	0.969477	0	NM_130451	Slc2a10	solute carrier family 2 (facilitated glucose transporter), member 10	170441	chr2 H3|2 98.0 cM	0006810 // transport // inferred from electronic annotation /// 0008643 // carbohydrate transport // inferred from electronic annotation /// 0015758 // glucose transport // not recorded /// 0055085 // transmembrane transport // inferred from electronic annotation
1460068_at	28.4478	31.1677	38.706	25.5736	26.9082	27.5625	-0.00176808	0.145079	0.529463	1.44339	-0.131445	-0.069737	0.0568414	1.04019	0	NM_001160214 /// NM_211355	Smek1	SMEK homolog 1, suppressor of mek1 (Dictyostelium)	68734	chr12 E
1418673_at	154.141	185.191	66.9307	246.186	242.501	136.454	-0.0124611	0.263096	-1.11901	0.46041	0.69815	0.672589	-0.0755247	0.948997	0	NM_011415	Snai2	snail homolog 2 (Drosophila)	20583	chr16 A1|16 9.4 cM	0006350 // transcription // inferred from electronic annotation /// 0006355 // regulation of transcription, DNA-dependent // inferred from electronic annotation /// 0007275 // multicellular organismal development // inferred from electronic annotation /// 0009314 // response to radiation // inferred from direct assay /// 0009314 // response to radiation // inferred from mutant phenotype /// 00458…
1447643_x_at	796.93	941.797	314.423	1171.01	1180.67	529.781	-0.00141604	0.258971	-1.26282	0.41673	0.576936	0.585521	-0.493725	0.710189	0	NM_011415	Snai2	snail homolog 2 (Drosophila)	20583	chr16 A1|16 9.4 cM	0006350 // transcription // inferred from electronic annotation /// 0006355 // regulation of transcription, DNA-dependent // inferred from electronic annotation /// 0007275 // multicellular organismal development // inferred from electronic annotation /// 0009314 // response to radiation // inferred from direct assay /// 0009314 // response to radiation // inferred from mutant phenotype /// 00458…
1456479_at	345.64	345.628	747.023	315.694	316.291	442.241	-0.00184834	0.0155793	1.19487	2.28925	-0.108547	-0.107191	0.457799	1.37344	0	NM_172468	Snx30	sorting nexin family member 30	209131	chr4 B3	0006810 // transport // inferred from electronic annotation /// 0007154 // cell communication // inferred from electronic annotation /// 0015031 // protein transport // inferred from electronic annotation
1416576_at	435.434	414.402	724.71	315.427	353.649	511.981	-0.000104586	-0.0536148	0.818237	1.76325	-0.447165	-0.280308	0.336191	1.26242	0	NM_007707	Socs3	suppressor of cytokine signaling 3	12702	chr11 E2	0001932 // regulation of protein amino acid phosphorylation // inferred from direct assay /// 0007242 // intracellular signaling cascade // inferred from electronic annotation /// 0009968 // negative regulation of signal transduction // inferred from genetic interaction /// 0009968 // negative regulation of signal transduction // inferred from electronic annotation /// 0019941 // modification-dep…
1419358_at	319.29	417.195	1222.24	334.765	418.668	928.861	-0.00322948	0.405296	2.02313	4.06465	0.0936569	0.410653	1.64307	3.1233	0	NM_030889	Sorcs2	sortilin-related VPS10 domain containing receptor 2	81840	chr5 B3
1416153_at	1312.7	1314.41	1635.94	1896.51	1862.75	2069.53	-0.00115078	0.0176965	0.404082	1.32325	0.555383	0.52369	0.759162	1.69251	0	NM_001100109 /// NM_001100110 /// NM_011899 /// XM_001479059 /// XM_976391	Srp54a /// Srp54b /// Srp54c	signal recognition particle 54a /// signal recognition particle 54b /// signal recognition particle 54C	100101806 /// 24067 /// 665155	chr12 C1	0006614 // SRP-dependent cotranslational protein targeting to membrane // not recorded /// 0006614 // SRP-dependent cotranslational protein targeting to membrane // inferred from electronic annotation	mRNA_processing_binding_Reactome // GenMAPP
1420377_at	357.801	402.076	64.244	433.774	477.95	110.115	-0.000777479	0.184282	-2.44399	0.183775	0.301114	0.438538	-1.5968	0.33061	0	NM_009181	St8sia2	ST8 alpha-N-acetyl-neuraminide alpha-2,8-sialyltransferase 2	20450	chr7 D2	0006486 // protein amino acid glycosylation // inferred from electronic annotation
1419186_a_at	1523.16	1819.49	591.453	2066.44	2163.16	797.942	-0.0016513	0.271581	-1.29281	0.408156	0.463612	0.525965	-0.832063	0.561725	0	NM_001159745 /// NM_009183	St8sia4	ST8 alpha-N-acetyl-neuraminide alpha-2,8-sialyltransferase 4	20452	chr1 D	0006486 // protein amino acid glycosylation // inferred from electronic annotation
1422821_s_at	239.573	256.775	535.157	229.542	253.481	397.919	-0.00411381	0.11388	1.24625	2.37224	-0.0402607	0.100712	0.835077	1.78395	0	NM_023377	Stard5	StAR-related lipid transfer (START) domain containing 5	170460	chr7 D3	0006694 // steroid biosynthetic process // inferred from electronic annotation /// 0006810 // transport // inferred from electronic annotation /// 0006869 // lipid transport // inferred from electronic annotation
1436513_at	328.393	288.473	919.432	282.964	305.465	574.241	-0.00297152	-0.176929	1.57291	2.97504	-0.193388	-0.092629	0.89896	1.86472	0	NM_181071	Tanc2	tetratricopeptide repeat, ankyrin repeat and coiled-coil containing 2	77097	chr11 E1
1434318_a_at	556.436	610.798	699.069	520.162	551.215	567.674	-0.000703767	0.150404	0.416213	1.33442	-0.073514	0.00639678	0.132008	1.09582	0	NM_001105196 /// NM_172472	Tcfe3	transcription factor E3	209446	chrX A2	0006350 // transcription // inferred from electronic annotation /// 0006355 // regulation of transcription, DNA-dependent // inferred from electronic annotation /// 0045449 // regulation of transcription // inferred from electronic annotation /// 0045670 // regulation of osteoclast differentiation // inferred from genetic interaction /// 0045893 // positive regulation of transcription, DNA-depend…	TGF_Beta_Signaling_Pathway // GenMAPP
1420719_at	146.562	206.673	260.67	231.33	333.483	393.209	-0.021355	0.458625	0.915691	1.88647	0.681058	1.19835	1.52528	2.87843	0	NM_031374	Tex15	testis expressed gene 15	104271	chr8 A4	0007129 // synapsis // inferred from mutant phenotype /// 0007130 // synaptonemal complex assembly // inferred from mutant phenotype /// 0007140 // male meiosis // inferred from mutant phenotype /// 0007283 // spermatogenesis // inferred from mutant phenotype /// 0009566 // fertilization // inferred from mutant phenotype /// 0010569 // regulation of double-strand break repair via homologous recom…
1451791_at	412.364	407.112	327.798	314.359	345.269	198.163	-0.00248139	-0.0171343	-0.24841	0.841823	-0.370664	-0.237243	-0.955923	0.515512	0	NM_011576	Tfpi	tissue factor pathway inhibitor	21788	chr2 D	0007596 // blood coagulation // inferred from electronic annotation
1450922_a_at	235.992	311.22	125.804	349.732	357.646	212.887	-0.00422636	0.41198	-0.822569	0.565434	0.581742	0.618599	-0.0477967	0.967413	0	NM_009367	Tgfb2	transforming growth factor, beta 2	21808	chr1 H5|1 101.5 cM	0000902 // cell morphogenesis // inferred from sequence or structural similarity /// 0000902 // cell morphogenesis // inferred from electronic annotation /// 0001501 // skeletal system development // inferred from mutant phenotype /// 0001502 // cartilage condensation // inferred from genetic interaction /// 0001568 // blood vessel development // inferred from mutant phenotype /// 0001654 // eye …
1422754_at	1157.76	1041.98	347.832	1407.52	1323.8	609.227	-0.00380395	-0.133611	-1.6483	0.319016	0.304478	0.210625	-0.832667	0.56149	0	NM_021883	Tmod1	tropomodulin 1	21916	chr4 B1|4 21.5 cM	0030239 // myofibril assembly // inferred from mutant phenotype /// 0030241 // muscle thick filament assembly // inferred from mutant phenotype	Striated_muscle_contraction // GenMAPP
1432158_a_at	1083.14	1112.89	1131.72	1281.42	1268.65	1322.58	-0.000701846	0.0518402	0.149825	1.10943	0.266463	0.247615	0.391106	1.3114	0	NM_025432	Trappc2	trafficking protein particle complex 2	66226	chrX F5	0006350 // transcription // inferred from electronic annotation /// 0006355 // regulation of transcription, DNA-dependent // inferred from sequence or structural similarity /// 0006810 // transport // inferred from electronic annotation /// 0006888 // ER to Golgi vesicle-mediated transport // inferred from electronic annotation /// 0016192 // vesicle-mediated transport // inferred from electronic…
1423924_s_at	1587.81	1510.3	2253.26	1460	1427.55	1522.75	-0.00183832	-0.0523151	0.591617	1.50694	-0.0994351	-0.132678	0.0423128	1.02976	0	NM_145928	Tspan14	tetraspanin 14	52588	chr14 B|14 14.5 cM
1436237_at	125.379	95.1368	242.751	71.4291	73.7399	141.827	-0.0118251	-0.421513	1.03753	2.05272	-0.808027	-0.744318	0.258696	1.1964	0	NM_001033149	Ttc9	tetratricopeptide repeat domain 9	69480	chr12 D1	0006457 // protein folding // inferred from electronic annotation
1425019_at	350.895	278.801	473.888	249.935	403.675	316.583	-0.000427013	-0.322394	0.516022	1.43001	-0.468466	0.220779	-0.0489679	0.966628	0	NM_145441	Ubxn2a	UBX domain protein 2A	217379	chr12 A1.1
1426260_a_at	1997.41	2088.61	3235.94	961.099	998.36	1932.82	-0.00624364	0.0827681	0.782147	1.71969	-1.03688	-0.979372	0.0555289	1.03924	0	NM_013701 /// NM_145079 /// NM_201410 /// NM_201641 /// NM_201642 /// NM_201643 /// NM_201644 /// NM_201645	Ugt1a1 /// Ugt1a10 /// Ugt1a2 /// Ugt1a5 /// Ugt1a6a /// Ugt1a6b /// Ugt1a7c /// Ugt1a9	UDP glucuronosyltransferase 1 family, polypeptide A1 /// UDP glycosyltransferase 1 family, polypeptide A10 /// UDP glucuronosyltransferase 1 family, polypeptide A2 /// UDP glucuronosyltransferase 1 family, polypeptide A5 /// UDP glucuronosyltransferase 1 family, polypeptide A6A /// UDP glucuronosyltransferase 1 family, polypeptide A6B /// UDP glucuronosyltransferase 1 family, polypeptide A7C /// …	22236 /// 394430 /// 394432 /// 394433 /// 394434 /// 394435 /// 394436 /// 94284	chr1 D /// chr1 D|1 51.7 cM	0007584 // response to nutrient // inferred from electronic annotation /// 0008152 // metabolic process // inferred from electronic annotation /// 0018879 // biphenyl metabolic process // inferred from electronic annotation /// 0019585 // glucuronate metabolic process // inferred from direct assay /// 0019585 // glucuronate metabolic process // not recorded /// 0042493 // response to drug // infe…	Irinotecan_pathway_PharmGKB // GenMAPP
1426261_s_at	553.666	554.599	860.658	256.911	263.433	538.747	-0.00376024	0.0148296	0.709368	1.63509	-1.09404	-1.06074	0.0614338	1.0435	0	NM_013701 /// NM_145079 /// NM_201410 /// NM_201641 /// NM_201642 /// NM_201643 /// NM_201644 /// NM_201645	Ugt1a1 /// Ugt1a10 /// Ugt1a2 /// Ugt1a5 /// Ugt1a6a /// Ugt1a6b /// Ugt1a7c /// Ugt1a9	UDP glucuronosyltransferase 1 family, polypeptide A1 /// UDP glycosyltransferase 1 family, polypeptide A10 /// UDP glucuronosyltransferase 1 family, polypeptide A2 /// UDP glucuronosyltransferase 1 family, polypeptide A5 /// UDP glucuronosyltransferase 1 family, polypeptide A6A /// UDP glucuronosyltransferase 1 family, polypeptide A6B /// UDP glucuronosyltransferase 1 family, polypeptide A7C /// …	22236 /// 394430 /// 394432 /// 394433 /// 394434 /// 394435 /// 394436 /// 94284	chr1 D /// chr1 D|1 51.7 cM	0007584 // response to nutrient // inferred from electronic annotation /// 0008152 // metabolic process // inferred from electronic annotation /// 0018879 // biphenyl metabolic process // inferred from electronic annotation /// 0019585 // glucuronate metabolic process // inferred from direct assay /// 0019585 // glucuronate metabolic process // not recorded /// 0042493 // response to drug // infe…	Irinotecan_pathway_PharmGKB // GenMAPP
1418123_at	566.084	723.917	2207.81	532.719	707.753	1619.29	-0.000110141	0.372204	2.04955	4.13977	-0.0698866	0.338058	1.61966	3.07303	0	NM_011676	Unc119	unc-119 homolog (C. elegans)	22248	chr11 B5|11 44.99 cM	0007601 // visual perception // inferred from electronic annotation /// 0050896 // response to stimulus // inferred from electronic annotation
1416773_at	487.774	464.331	556.206	679.491	758.912	966.9	-0.0315476	-0.0931268	0.266148	1.20259	0.496457	0.653696	1.08843	2.12642	0	NM_009516	Wee1	WEE 1 homolog 1 (S. pombe)	22390	chr7 F1	0006468 // protein amino acid phosphorylation // inferred from electronic annotation /// 0007049 // cell cycle // inferred from electronic annotation /// 0007067 // mitosis // inferred from electronic annotation /// 0051301 // cell division // inferred from electronic annotation	Cell_Cycle_KEGG // GenMAPP /// G1_to_S_cell_cycle_Reactome // GenMAPP
1422093_at	345.659	361.709	232.321	412.595	394.409	326.17	-0.00314117	0.0666347	-0.486155	0.713925	0.280354	0.211546	0.0189987	1.01326	0	NM_009522	Wnt3a	wingless-related MMTV integration site 3A	22416	chr11 B1.3|11 32.0 cM	0001701 // in utero embryonic development // inferred from mutant phenotype /// 0001756 // somitogenesis // inferred from mutant phenotype /// 0001947 // heart looping // inferred from mutant phenotype /// 0007165 // signal transduction // traceable author statement /// 0007223 // Wnt receptor signaling pathway, calcium modulating pathway // inferred from electronic annotation /// 0007267 // cell…	Wnt_Signaling // GenMAPP
1437395_at	671.26	584.566	475.719	895.741	820.931	682.085	-0.00668589	-0.183677	-0.411145	0.752026	0.434243	0.308567	0.124605	1.09021	0	NM_175472	Zcchc11	zinc finger, CCHC domain containing 11	230594	chr4 C7	0001816 // cytokine production // inferred from direct assay /// 0031664 // regulation of lipopolysaccharide-mediated signaling pathway // inferred from direct assay /// 0032088 // negative regulation of NF-kappaB transcription factor activity // inferred from direct assay
1425080_at	32.2672	34.4785	27.5809	39.4044	34.8217	32.3549	-0.00114459	0.112137	-0.14044	0.907243	0.312495	0.129695	0.106005	1.07624	0	NM_138949	Zfp286	zinc finger protein 286	192651	chr11 B2	0006350 // transcription // inferred from electronic annotation /// 0006355 // regulation of transcription, DNA-dependent // inferred from electronic annotation
1425583_at	58.8979	63.2813	60.2175	74.7834	77.9321	85.3006	-0.00345072	0.123515	0.118093	1.0853	0.366604	0.425085	0.635318	1.55328	0
1436320_at	1750.91	1870.08	2384.52	1288.17	1350.72	1405.98	-0.00102682	0.100055	0.521426	1.43537	-0.417879	-0.35417	-0.213649	0.862353	0
1436389_at	1168.84	1091.35	1511.27	1344.54	1276.3	1723.02	-0.00308502	-0.0811888	0.457014	1.3727	0.226642	0.145569	0.661503	1.58173	0
1439292_at	78.6298	82.1604	94.3893	67.2529	77.7812	66.1247	-0.00774478	0.0757807	0.348561	1.27329	-0.203067	0.00167957	-0.14775	0.902657	0
1439732_at	63.1516	58.7833	30.1317	121.048	106.929	36.5031	-0.000973679	-0.151371	-0.982946	0.505946	0.961439	0.780188	-0.68796	0.620731	0
1441971_at	128.318	91.6781	367.683	97.2013	108.812	251.84	-0.0212898	-0.493911	1.60694	3.04605	-0.3876	-0.222293	1.07545	2.10738	0
1445764_at	30.3003	28.1663	30.6582	32.3032	29.1412	36.2637	-0.000801886	-0.0889748	0.103185	1.07414	0.115772	-0.0406281	0.361701	1.28494	0
1447068_at	27.5917	38.5467	27.596	28.5543	27.0044	43.1146	-0.0108322	0.401049	0.0856024	1.06113	0.0753396	-0.0112194	0.747931	1.67938	0
1455490_at	1349.19	959.972	401.044	322.809	423.629	130.351	-0.00186033	-0.547034	-1.9234	0.263633	-2.08631	-1.72975	-3.30505	0.101177	0
1456539_at	243.56	237.294	2827.16	173.684	222.483	1650.11	-0.0201482	-0.0199546	3.62218	12.3136	-0.466046	-0.109482	2.85541	7.23708	0
1458341_x_at	1719.35	1598.84	655.791	2342.42	1916.5	1179.91	-0.013388	-0.0876824	-1.31113	0.403005	0.466529	0.175351	-0.441665	0.736284	0
1459345_at	38.5857	42.3151	39.102	41.3234	37.8544	44.7042	-0.00108962	0.150792	0.105286	1.07571	0.124198	-0.00728621	0.315777	1.24468	0
1437302_at	524.13	523.739	131.532	696.293	598.834	243.139	-0.00504756	0.0012135	-1.91535	0.265107	0.432847	0.211447	-1.01361	0.495304	1	NM_007420	Adrb2	adrenergic receptor, beta 2	11555	chr18 E1|18 34.0 cM	0001993 // regulation of systemic arterial blood pressure by norepinephrine-epinephrine // inferred from mutant phenotype /// 0002024 // diet induced thermogenesis // inferred from genetic interaction /// 0002025 // vasodilation by norepinephrine-epinephrine involved in regulation of systemic arterial blood pressure // inferred from genetic interaction /// 0002025 // vasodilation by norepinephrin…	Calcium_regulation_in_cardiac_cells // GenMAPP /// GPCRDB_Class_A_Rhodopsin-like // GenMAPP /// Monoamine_GPCRs // GenMAPP
1448894_at	889.663	1092.67	2351.02	569.277	821.073	1289.32	-0.013681	0.316289	1.48158	2.79254	-0.619013	-0.0947536	0.639611	1.55791	1	NM_008012	Akr1b8	aldo-keto reductase family 1, member B8	14187	chr6 B1|6 13.0 cM	0055114 // oxidation reduction // inferred from electronic annotation
1451222_at	538.833	479.437	607.334	643.606	655.535	705.43	-0.00137132	-0.174232	0.258693	1.19639	0.278703	0.301553	0.491131	1.40555	1	NM_027453	Btf3l4	basic transcription factor 3-like 4	70533	chr4 C7
1416868_at	1037.37	1100.2	453.149	1287.62	1409.28	752.186	-0.0089527	0.102263	-1.12079	0.45984	0.336444	0.459279	-0.361644	0.778277	1	NM_007671	Cdkn2c	cyclin-dependent kinase inhibitor 2C (p18, inhibits CDK4)	12580	chr4 C7|4 24.7 cM	0000079 // regulation of cyclin-dependent protein kinase activity // inferred from electronic annotation /// 0000082 // G1/S transition of mitotic cell cycle // inferred from electronic annotation /// 0006917 // induction of apoptosis // inferred from electronic annotation /// 0007049 // cell cycle // inferred from electronic annotation /// 0007050 // cell cycle arrest // inferred from electronic…	G1_to_S_cell_cycle_Reactome // GenMAPP
1455563_at	393.603	362.366	559.261	376.227	417.747	477.328	-0.00015553	-0.106854	0.593236	1.50863	-0.0404979	0.0997008	0.381324	1.30254	1	NM_001024922	Ddx49	DEAD (Asp-Glu-Ala-Asp) box polypeptide 49	234374	chr8 B3.3
1424303_at	55.0971	57.263	130.196	54.5506	62.7113	69.1634	-0.000790015	0.0121197	1.32258	2.50112	-0.00137074	0.179171	0.427358	1.34477	1	NM_144804	Depdc7	DEP domain containing 7	211896	chr2 E2	0007242 // intracellular signaling cascade // inferred from electronic annotation
1436545_at	799.821	741.838	1120.51	598.181	548.426	640.309	-0.005742	-0.0972072	0.56325	1.47759	-0.397485	-0.528389	-0.219525	0.858848	1	NM_172442	Dtx4	deltex 4 homolog (Drosophila)	207521	chr19 A	0007219 // Notch signaling pathway // inferred from electronic annotation
1428116_a_at	6977.88	7382.01	8900.11	4298.24	5074.64	6044.87	-0.000950438	0.0983245	0.436944	1.35373	-0.675027	-0.438587	-0.103906	0.93051	1	NM_009342 /// XM_001475602 /// XM_001475617 /// XM_001475631 /// XM_001475648 /// XM_001481167 /// XM_001481168	Dynlt1 /// Dynlt1d /// ENSMUSG00000056252	dynein light chain Tctex-type 1 /// dynein light chain Tctex-type 1D /// predicted gene, ENSMUSG00000056252	100040603 /// 100043890 /// 21648	chr17 A1|17 /// chr17 A1|17 3.1 cM /// chr6 G1	0007017 // microtubule-based process // inferred from direct assay
1428919_at	455.009	450.518	762.261	421.912	464.088	539.14	-0.00270222	0.00362295	0.830227	1.77796	-0.0833877	0.0479676	0.346697	1.27165	1	NM_201230	Fgfr1op	Fgfr1 oncogene partner	75296	chr17 A1	0034453 // microtubule anchoring // inferred from electronic annotation
1418697_at	19033.5	16816.8	3502.26	20043.4	19192.6	7547.09	-0.000299344	-0.161282	-2.3718	0.193204	0.0990398	0.0323617	-1.23859	0.423786	1	NM_009349	Inmt	indolethylamine N-methyltransferase	21743	chr6 B3
1456097_a_at	100.495	110.686	128.396	129.415	130.376	165.566	-0.00106279	0.124484	0.437864	1.3546	0.386033	0.389647	0.82283	1.76887	1	NM_026348	Itgb3bp	integrin beta 3 binding protein (beta3-endonexin)	67733	chr4 C6	0006350 // transcription // inferred from electronic annotation /// 0006355 // regulation of transcription, DNA-dependent // inferred from electronic annotation /// 0006915 // apoptosis // inferred from electronic annotation /// 0007229 // integrin-mediated signaling pathway // inferred from electronic annotation
1450872_s_at	1333.95	1337.96	1620.33	1190.41	1179.2	1202.6	-0.000957049	0.0219574	0.366322	1.28906	-0.140768	-0.159552	-0.0483355	0.967051	1	NM_001111100 /// NM_021460	Lipa	lysosomal acid lipase A	16889	chr19 C1	0000902 // cell morphogenesis // inferred from mutant phenotype /// 0001816 // cytokine production // inferred from mutant phenotype /// 0006629 // lipid metabolic process // inferred from electronic annotation /// 0006954 // inflammatory response // inferred from mutant phenotype /// 0008283 // cell proliferation // inferred from mutant phenotype /// 0016042 // lipid catabolic process // inferre…
1448791_at	1198.74	1203.15	1539.84	1561.3	1625.93	2299.91	-0.0110646	0.0168199	0.446389	1.36263	0.403076	0.458782	1.04165	2.05858	1	NM_024225 /// XM_001480782	LOC100048642 /// Snx5	similar to Snx5 protein /// sorting nexin 5	100048642 /// 69178	chr2 H1|2 80.0 cM	0006810 // transport // inferred from electronic annotation /// 0007154 // cell communication // inferred from electronic annotation /// 0015031 // protein transport // inferred from electronic annotation
1422707_at	293.738	292.285	417.338	271.473	293.911	279.952	-0.000965918	0.0122666	0.592231	1.50758	-0.0932055	0.0169785	0.0329861	1.02313	1	NM_001146200 /// NM_001146201 /// NM_020272	Pik3cg	phosphoinositide-3-kinase, catalytic, gamma polypeptide	30955	chr12 B	0006468 // protein amino acid phosphorylation // inferred from direct assay /// 0043066 // negative regulation of apoptosis // inferred from direct assay /// 0046854 // phosphoinositide phosphorylation // inferred from electronic annotation /// 0048015 // phosphoinositide-mediated signaling // inferred from electronic annotation
1435043_at	990.729	803.864	236.348	1090.71	902.737	372.272	-0.000474511	-0.30043	-1.98882	0.251945	0.163413	-0.113627	-1.31274	0.402556	1	NM_001145830 /// NM_019677	Plcb1	phospholipase C, beta 1	18795	chr2 F3|2 76.7 cM	0006629 // lipid metabolic process // inferred from electronic annotation /// 0007165 // signal transduction // inferred from electronic annotation /// 0007242 // intracellular signaling cascade // inferred from electronic annotation /// 0016042 // lipid catabolic process // inferred from electronic annotation
1452398_at	861.106	749.351	167.109	1056.09	944.602	300.684	-0.000580764	-0.201519	-2.28881	0.204644	0.318611	0.151947	-1.41606	0.374735	1	NM_019588	Plce1	phospholipase C, epsilon 1	74055	chr19 D1	0000187 // activation of MAPK activity // inferred from electronic annotation /// 0000187 // activation of MAPK activity // inferred from sequence or structural similarity /// 0006629 // lipid metabolic process // inferred from electronic annotation /// 0007165 // signal transduction // inferred from electronic annotation /// 0007200 // activation of phospholipase C activity by G-protein coupled …
1448141_at	397.418	389.988	456.888	361.287	367.192	383.971	-0.000454766	-0.00800711	0.28814	1.22106	-0.113285	-0.095276	0.0537012	1.03792	1	NM_029101	Rrp7a	ribosomal RNA processing 7 homolog A (S. cerevisiae)	74778	chr15 E1
1418857_at	91.643	80.8024	438.642	61.0557	67.6971	149.424	-0.128818	-0.162383	2.34021	5.06378	-0.57575	-0.412443	0.802676	1.74433	1	NM_022411	Slc13a2	solute carrier family 13 (sodium-dependent dicarboxylate transporter), member 2	20500	chr11 B5|11 45.03 cM	0006810 // transport // inferred from electronic annotation /// 0006811 // ion transport // inferred from electronic annotation /// 0006814 // sodium ion transport // inferred from electronic annotation
1450891_at	1256.3	1155.65	1624.52	1143.45	1168.92	1311.5	-0.000597502	-0.104713	0.45692	1.37261	-0.111297	-0.0845095	0.164452	1.12074	1	NM_025527	Srp19	signal recognition particle 19	66384	chr18 B3	0006614 // SRP-dependent cotranslational protein targeting to membrane // inferred from electronic annotation	mRNA_processing_binding_Reactome // GenMAPP
1453480_at	116.775	146.125	895.865	116.105	119.55	539.555	-0.0282547	0.336249	3.02191	8.1224	0.015574	0.0555293	2.31091	4.96195	1	XM_885435 /// XM_914650	Tmem213	transmembrane protein 213	77522	chr6 B1
1424383_at	659.747	589.535	1101.88	546.511	602.776	765.407	-0.000764039	-0.142964	0.826808	1.77376	-0.252631	-0.109721	0.314812	1.24385	1	NM_145402	Tmem51	transmembrane protein 51	214359	chr4 E1
1445860_at	111.821	117.234	879.689	92.2195	97.6541	689.559	-0.0137048	0.0685936	3.06227	8.35288	-0.272995	-0.19715	2.72708	6.62112	1	NM_026743	Tspan11	tetraspanin 11	68498	chr6 F3
1423869_s_at	396.389	407.114	646.661	489.076	476.33	746.043	-0.000515256	0.0553188	0.791039	1.73032	0.328035	0.284788	1.0156	2.02175	1	NM_153162	Txnrd3	thioredoxin reductase 3	232223	chr6 D1	0006749 // glutathione metabolic process // inferred from direct assay /// 0006810 // transport // inferred from electronic annotation /// 0007275 // multicellular organismal development // inferred from electronic annotation /// 0007283 // spermatogenesis // inferred from electronic annotation /// 0022900 // electron transport chain // inferred from electronic annotation /// 0030154 // cell diff…
1458719_at	27.7119	32.2602	38.1845	228.317	246.014	292.165	-0.0451412	0.230738	0.541473	1.45546	3.0624	3.15413	3.49791	11.2973	1
1436785_a_at	6754.56	5866.51	1441.07	6919.46	6932.18	2738.02	-0.000987129	-0.183981	-2.1496	0.225375	0.059882	0.0580107	-1.19952	0.435421	2		1110069O07Rik	RIKEN cDNA 1110069O07 gene	71798
1453173_at	524.662	549.1	709.758	438.798	549.797	565.101	-0.000745927	0.0816824	0.522675	1.43662	-0.233313	0.0862002	0.209875	1.15659	2	NM_172398	2310005E10Rik	RIKEN cDNA 2310005E10 gene	67861	chr6 B1	0055114 // oxidation reduction // inferred from electronic annotation
1428921_at	59.5824	52.5134	53.1571	122.044	101.925	88.2815	-0.0215166	-0.216194	-0.0808367	0.945509	1.05521	0.785142	0.666502	1.58722	2	NM_025479	2810021B07Rik	RIKEN cDNA 2810021B07 gene	66308	chr13 A3.1
1438667_at	112.51	95.0218	49.3951	162.092	140.918	60.0337	-0.0057095	-0.269518	-1.10935	0.463502	0.551987	0.346272	-0.80927	0.570671	2	NM_001032727 /// NM_176998 /// NM_178765	5730410E15Rik	RIKEN cDNA 5730410E15 gene	319613	chr15 B3.2
1443870_at	317.362	310.349	739.132	262.772	286.449	582.18	-0.000310156	-0.0198038	1.30363	2.46849	-0.247594	-0.130375	0.977917	1.96962	2	NM_001033336	Abcc4	ATP-binding cassette, sub-family C (CFTR/MRP), member 4	239273	chr14 E4	0006810 // transport // inferred from electronic annotation /// 0006811 // ion transport // inferred from electronic annotation /// 0006855 // multidrug transport // traceable author statement
1441001_at	48.9895	44.7593	48.6304	161.071	76.0784	65.2081	-0.00419172	-0.141098	0.0746861	1.05313	1.72544	0.639612	0.508772	1.42284	2		AI225934	expressed sequence AI225934	98884
1455454_at	31.5787	35.2429	77.3904	30.0628	30.9248	50.7112	-8.7219e-05	0.145662	1.37944	2.60167	-0.0492728	-0.0122222	0.780171	1.71733	2	NM_001013785	Akr1c19	aldo-keto reductase family 1, member C19	432720	chr13 A1	0055114 // oxidation reduction // inferred from electronic annotation
1418844_at	444.268	392.381	548.212	378.875	415.158	452.83	-0.000361309	-0.171866	0.389251	1.30971	-0.205173	-0.0779486	0.131058	1.0951	2	NM_133981	Alg9	asparagine-linked glycosylation 9 homolog (yeast, alpha 1,2 mannosyltransferase)	102580	chr9 A5.3	0006506 // GPI anchor biosynthetic process // inferred from electronic annotation
1421002_at	349.325	290.955	132.091	441.299	426.231	244.361	-8.9199e-05	-0.249697	-1.32023	0.400472	0.352279	0.30716	-0.414876	0.750084	2	NM_011923	Angptl2	angiopoietin-like 2	26360	chr2 B	0007165 // signal transduction // inferred from electronic annotation
1450085_at	273.008	194.279	76.4132	346.374	340.718	165.977	-0.00208971	-0.51628	-1.75567	0.296136	0.359316	0.338854	-0.617234	0.65192	2	NM_011923	Angptl2	angiopoietin-like 2	26360	chr2 B	0007165 // signal transduction // inferred from electronic annotation
1455090_at	1169.14	935.867	335.005	1627.61	1521.93	661.111	-0.00183725	-0.301148	-1.71972	0.303607	0.500606	0.401266	-0.721549	0.606446	2	NM_011923	Angptl2	angiopoietin-like 2	26360	chr2 B	0007165 // signal transduction // inferred from electronic annotation
1452870_at	291.961	272.37	208.754	313.304	299.108	244.811	-0.00026017	-0.0853347	-0.39736	0.759246	0.126513	0.0504752	-0.151561	0.900276	2	NM_001042558 /// NM_009684	Apaf1	apoptotic peptidase activating factor 1	11783	chr10 C3-D1|10 48.0 cM	0001843 // neural tube closure // inferred from mutant phenotype /// 0006309 // DNA fragmentation involved in apoptosis // inferred from genetic interaction /// 0006508 // proteolysis // inferred from electronic annotation /// 0006915 // apoptosis // inferred from electronic annotation /// 0006917 // induction of apoptosis // inferred from electronic annotation /// 0006919 // activation of caspas…	Apoptosis // GenMAPP /// Apoptosis_GenMAPP // GenMAPP /// Apoptosis_KEGG // GenMAPP
1434460_at	78.3232	93.3104	55.8483	102.761	92.4348	79.6045	-0.00593171	0.271367	-0.407744	0.753801	0.414987	0.255811	0.126004	1.09127	2	NM_175325	Bbs4	Bardet-Biedl syndrome 4 (human)	102774	chr9 B|9 33.0 cM	0000226 // microtubule cytoskeleton organization // inferred from mutant phenotype /// 0001843 // neural tube closure // inferred from mutant phenotype /// 0001895 // retina homeostasis // inferred from mutant phenotype /// 0007286 // spermatid development // inferred from mutant phenotype /// 0007608 // sensory perception of smell // inferred from mutant phenotype /// 0016358 // dendrite develop…
1450381_a_at	200.487	175.679	235.949	154.409	136.527	187.906	-0.000368687	-0.173745	0.322049	1.25011	-0.353834	-0.535215	0.0098943	1.00688	2	NM_009744	Bcl6	B-cell leukemia/lymphoma 6	12053	chr16 B1|16 13.9 cM	0000060 // protein import into nucleus, translocation // inferred from electronic annotation /// 0000122 // negative regulation of transcription from RNA polymerase II promoter // inferred from direct assay /// 0000122 // negative regulation of transcription from RNA polymerase II promoter // inferred from genetic interaction /// 0000122 // negative regulation of transcription from RNA polymerase…
1420683_at	96.7382	92.1588	480.783	73.7559	85.2084	300.25	-0.0191116	-0.0553878	2.39944	5.276	-0.366897	-0.165765	1.73118	3.31998	2	NM_134253	Bnipl	BCL2/adenovirus E1B 19kD interacting protein like	171388	chr3 F2.1	0006915 // apoptosis // inferred from electronic annotation /// 0006917 // induction of apoptosis // not recorded
1417376_a_at	1972.41	1968.8	1291.92	2394.77	2359.33	1937.78	-0.000896562	0.0141429	-0.526318	0.694325	0.298608	0.278017	0.074948	1.05332	2	NM_001025600 /// NM_018770 /// NM_207675 /// NM_207676	Cadm1	cell adhesion molecule 1	54725	chr9 B-C	0006915 // apoptosis // inferred from electronic annotation /// 0006955 // immune response // inferred from electronic annotation /// 0007049 // cell cycle // inferred from electronic annotation /// 0007155 // cell adhesion // inferred from direct assay /// 0007155 // cell adhesion // inferred from electronic annotation /// 0007156 // homophilic cell adhesion // inferred from direct assay /// 000…
1449297_at	261.143	298.208	110.77	308.81	412.136	173.637	-0.00214306	0.184207	-1.15259	0.449818	0.263989	0.676387	-0.488449	0.712791	2	NM_009808	Casp12	caspase 12	12364	chr9 A1|9 1.11 cM	0006508 // proteolysis // inferred from reviewed computational analysis /// 0006508 // proteolysis // inferred from electronic annotation /// 0006915 // apoptosis // inferred from direct assay /// 0006915 // apoptosis // inferred from electronic annotation /// 0006917 // induction of apoptosis // inferred from reviewed computational analysis /// 0006926 // virus-infected cell apoptosis // inferre…
1427912_at	592.568	570.467	781.967	453.893	467.9	421.425	-0.00111746	-0.0401046	0.483122	1.39777	-0.367493	-0.320825	-0.390924	0.762641	2	NM_173047	Cbr3	carbonyl reductase 3	109857	chr16 C4|16 67.2 cM	0008152 // metabolic process // inferred from electronic annotation /// 0055114 // oxidation reduction // inferred from electronic annotation
1452332_at	410.472	384.928	54.0397	527.251	449.191	119.589	-0.00515013	-0.0994553	-2.84456	0.13922	0.384786	0.138728	-1.67882	0.312338	2	NM_181577	Ccdc85a	coiled-coil domain containing 85A	216613	chr11 A3.3
1417420_at	3011.25	3054.3	4560.91	2920.94	3886.1	6643.1	-0.0106724	0.0368988	0.685027	1.60773	-0.0210004	0.384749	1.24363	2.36793	2	NM_007631	Ccnd1	cyclin D1	12443	chr7 F5|7 72.3 cM	0000320 // re-entry into mitotic cell cycle // inferred from direct assay /// 0001934 // positive regulation of protein amino acid phosphorylation // inferred from electronic annotation /// 0006468 // protein amino acid phosphorylation // inferred from direct assay /// 0007049 // cell cycle // inferred from direct assay /// 0007049 // cell cycle // inferred from electronic annotation /// 0010039 …	G1_to_S_cell_cycle_Reactome // GenMAPP /// Wnt_Signaling // GenMAPP
1416072_at	1677.79	1798.5	1177.53	2034.81	2546.11	1723.76	-6.20188e-05	0.117803	-0.434213	0.740097	0.302217	0.621472	0.141621	1.10314	2	NM_001111059 /// NM_133654	Cd34	CD34 antigen	12490	chr1 H6|1 106.6 cM	0007155 // cell adhesion // inferred from electronic annotation /// 0050900 // leukocyte migration // inferred from mutant phenotype
1427095_at	459.267	465.651	1100.89	411.761	498.774	856.68	-0.000715049	0.0360129	1.34821	2.54596	-0.134201	0.139871	1.00294	2.00409	2	NM_133974	Cdcp1	CUB domain containing protein 1	109332	chr9 F4
1448477_at	607.592	637.423	442.444	687.824	667.744	560.867	-0.00075742	0.0763775	-0.374943	0.771136	0.203021	0.156353	-0.0124403	0.991414	2	NM_021528	Chst12	carbohydrate sulfotransferase 12	59031	chr5 G2	0005975 // carbohydrate metabolic process // inferred from electronic annotation /// 0016051 // carbohydrate biosynthetic process // inferred from electronic annotation /// 0030206 // chondroitin sulfate biosynthetic process // inferred from sequence or structural similarity /// 0030208 // dermatan sulfate biosynthetic process // inferred from sequence or structural similarity
1429413_at	2909.66	2632.69	7779.42	2558.13	2459.39	5617.93	-0.00274544	-0.125194	1.50271	2.83375	-0.162051	-0.223758	1.05075	2.0716	2	NM_027468 /// XM_917914 /// XM_994613	Cpm	carboxypeptidase M	70574	chr10 D2	0006508 // proteolysis // inferred from electronic annotation
1419209_at	369.501	163.469	970.165	72.2776	70.6173	313.937	-0.0176497	-1.24529	1.4707	2.77157	-2.38495	-2.37082	-0.133514	0.911608	2	NM_008176	Cxcl1	chemokine (C-X-C motif) ligand 1	14825	chr5 E-F|5 51.0 cM	0006954 // inflammatory response // inferred from electronic annotation /// 0006955 // immune response // inferred from electronic annotation
1427358_a_at	992.489	978.078	1469.8	680.041	703.554	1127.33	-0.00085557	-0.003308	0.652759	1.57217	-0.522469	-0.476317	0.283285	1.21696	2	NM_029653 /// NM_134062	Dapk1	death associated protein kinase 1	69635	chr13 B2|13 40.0 cM	0006468 // protein amino acid phosphorylation // inferred from direct assay /// 0006468 // protein amino acid phosphorylation // inferred from electronic annotation /// 0006915 // apoptosis // inferred from electronic annotation /// 0006916 // anti-apoptosis // inferred from mutant phenotype /// 0007165 // signal transduction // inferred from electronic annotation /// 0007243 // protein kinase ca…
1426905_a_at	1507.79	1390.01	1568.34	1112.4	1172.68	1178.34	-0.000242461	-0.102358	0.14299	1.10419	-0.414254	-0.342412	-0.252949	0.839179	2	NM_024181 /// XR_033124	Dnajc10 /// LOC100047007	DnaJ (Hsp40) homolog, subfamily C, member 10 /// similar to DnaJ (Hsp40) homolog, subfamily C, member 10	100047007 /// 66861	chr2 D	0006457 // protein folding // inferred from electronic annotation /// 0045454 // cell redox homeostasis // inferred from electronic annotation
1455884_at	755.598	825.093	2019.65	680.734	695.042	1277.79	-0.00595629	0.142892	1.50486	2.83797	-0.132922	-0.0990994	0.861636	1.8171	2	NM_172624	Dpp9	dipeptidylpeptidase 9	224897	chr17 D	0006508 // proteolysis // inferred from electronic annotation
1455711_at	278.97	272.533	415.113	218.439	208.92	280.11	-0.00452567	-0.021889	0.659352	1.57937	-0.334561	-0.396849	0.107401	1.07729	2	NM_172442	Dtx4	deltex 4 homolog (Drosophila)	207521	chr19 A	0007219 // Notch signaling pathway // inferred from electronic annotation
1449196_a_at	11883.2	12269.6	12948.1	13143.2	12511.1	13854.6	-0.000937683	0.065095	0.210393	1.157	0.169729	0.0940773	0.32432	1.25207	2	NM_001033865 /// NM_024277 /// XR_031334 /// XR_031687 /// XR_033402 /// XR_033646	EG668779 /// LOC100042019 /// Rps27a	predicted gene, EG668779 /// similar to fusion protein: ubiquitin (bases 43_513); ribosomal protein S27a (bases 217_532) /// ribosomal protein S27A	100042019 /// 668779 /// 78294	chr11 A3.3 /// chr7 B5	0006412 // translation // inferred from electronic annotation /// 0006464 // protein modification process // inferred from electronic annotation /// 0016567 // protein ubiquitination // inferred from electronic annotation /// 0045941 // positive regulation of transcription // inferred from electronic annotation
1437020_at	219.317	202.614	197.809	187.381	208.839	135.787	-0.000183468	-0.0992653	-0.0643449	0.956379	-0.203575	-0.0550496	-0.5979	0.660715	2	NM_029337 /// NM_173066	Ep400	E1A binding protein p400	75560	chr5 F	0016568 // chromatin modification // inferred from electronic annotation
1423232_at	112.877	121.859	378.814	109.208	117.573	232.264	-0.00175188	0.130572	1.83193	3.56014	-0.0229233	0.0777715	1.13959	2.20318	2	NM_008815	Etv4	ets variant gene 4 (E1A enhancer binding protein, E1AF)	18612	chr11 D|11 60.0 cM	0006350 // transcription // inferred from electronic annotation /// 0006355 // regulation of transcription, DNA-dependent // inferred from electronic annotation /// 0008045 // motor axon guidance // inferred from mutant phenotype /// 0009887 // organ morphogenesis // inferred from direct assay /// 0045941 // positive regulation of transcription // inferred from direct assay /// 0045941 // positiv…
1428861_at	1231.89	1177.22	587.927	1374.3	1352.87	801.477	-0.0023523	-0.0587026	-0.982904	0.50596	0.182127	0.154242	-0.518609	0.698045	2	NM_001040397 /// NM_030163	Filip1l	filamin A interacting protein 1-like	78749	chr16 C1.1
1424109_a_at	1197.1	1214.05	2052.26	2485.3	2573.27	3643.27	-0.00189981	0.0384427	0.86382	1.81985	1.07502	1.12337	1.7074	3.26572	2	NM_001113560 /// NM_025374	Glo1	glyoxalase 1	109801	chr17 A3.3|17 16.0 cM	0006916 // anti-apoptosis // inferred from electronic annotation /// 0006916 // anti-apoptosis // inferred from sequence or structural similarity
1430834_at	34.1402	30.6755	78.8852	28.1703	27.9929	43.6805	-0.00789902	-0.218003	1.29204	2.44873	-0.262348	-0.281131	0.446842	1.36305	2	NM_183183	Gprin3	GPRIN family member 3	243385	chr6 B3
1435402_at	123.675	130.703	335.995	112.16	146.197	256.604	-0.0086401	0.0943143	1.52883	2.88552	-0.118501	0.261365	1.15723	2.23029	2	NM_172768	Gramd1b	GRAM domain containing 1B	235283	chr9 B
1423436_at	1395.83	1568.48	433.331	602.299	600.434	168.817	-0.0143034	0.184763	-1.61	0.327599	-1.19347	-1.19838	-2.95254	0.129181	2	NM_001077353 /// NM_010356	Gsta3	glutathione S-transferase, alpha 3	14859	chr1 A4|1 15.0 cM	0008152 // metabolic process // inferred from electronic annotation
1427473_at	68.9941	58.7464	67.2391	50.3782	51.4945	52.4799	-0.000752858	-0.212084	0.0499174	1.03521	-0.428255	-0.403081	-0.29122	0.817211	2	NM_010359	Gstm3	glutathione S-transferase, mu 3	14864		0008152 // metabolic process // inferred from electronic annotation	Circadian_Exercise // GenMAPP
1420626_at	551.497	504.207	797.988	471.039	505.628	620.827	-0.00116379	-0.117222	0.619983	1.53686	-0.204362	-0.104764	0.272391	1.20781	2	NM_026113	Gtf3c6	general transcription factor IIIC, polypeptide 6, alpha	67371	chr10 B1	0006350 // transcription // inferred from electronic annotation /// 0006351 // transcription, DNA-dependent // inferred from electronic annotation
1424522_at	891.959	901.077	1477.18	633.495	575.707	715.7	-0.00132927	0.0341078	0.812559	1.75632	-0.478211	-0.612923	-0.223891	0.856253	2	NM_144835	Heatr1	HEAT repeat containing 1	217995	chr13 A1
1416761_at	103.404	137.906	344.574	104.926	128.442	163.638	-0.00325336	0.422054	1.81513	3.51892	0.0427695	0.331365	0.757318	1.69034	2	NM_008289	Hsd11b2	hydroxysteroid 11-beta dehydrogenase 2	15484	chr8 D3|8 50.8 cM	0002017 // regulation of blood volume by renal aldosterone // inferred from electronic annotation /// 0008152 // metabolic process // inferred from electronic annotation /// 0008211 // glucocorticoid metabolic process // inferred from electronic annotation /// 0055114 // oxidation reduction // inferred from electronic annotation	Glucocorticoid_Mineralocorticoid_Metabolism // GenMAPP /// Prostaglandin_synthesis_regulation // GenMAPP
1428967_at	406.577	260.596	271.452	324.411	311.515	130.36	-0.0014263	-0.641744	-0.495543	0.709295	-0.30151	-0.367543	-1.54671	0.34229	2	NM_010513	Igf1r	insulin-like growth factor I receptor	16001	chr7 D1|7 33.0 cM	0006468 // protein amino acid phosphorylation // inferred from direct assay /// 0006468 // protein amino acid phosphorylation // inferred from electronic annotation /// 0006955 // immune response // inferred from electronic annotation /// 0007169 // transmembrane receptor protein tyrosine kinase signaling pathway // inferred from electronic annotation /// 0007420 // brain development // inferred …
1455434_a_at	1118.35	972.928	813.869	1243.22	1075.88	907.583	-0.000233147	-0.198074	-0.372095	0.77266	0.177791	-0.0361218	-0.198783	0.871285	2	NM_008477	Ktn1	kinectin 1	16709	chr14 C2	0007018 // microtubule-based movement // traceable author statement
1434597_at	2291.59	2089.68	2663.42	1885.06	1977.53	2169.01	-0.00136065	-0.113545	0.303565	1.23419	-0.25639	-0.192811	0.0244584	1.0171	2	NM_172585	Larp5	La ribonucleoprotein domain family, member 5	217980	chr13 A1|13 5.0 cM
1416980_at	46.556	53.6281	86.1298	43.2839	45.7179	50.0571	-0.00585799	0.188173	0.971982	1.96153	-0.0854456	-0.0108286	0.20302	1.15111	2	NM_027853	Mettl7b	methyltransferase like 7B	71664	chr10 D3	0008152 // metabolic process // inferred from electronic annotation
1423596_at	348.045	456.878	1562.93	333.196	436.02	1270.39	-0.00166416	0.410153	2.2541	4.77037	-0.0451047	0.345411	1.97132	3.92125	2	NM_001159631 /// NM_021606	Nek6	NIMA (never in mitosis gene a)-related expressed kinase 6	59126	chr2 B|2 28.0 cM	0006468 // protein amino acid phosphorylation // inferred from electronic annotation /// 0006468 // protein amino acid phosphorylation // inferred from sequence or structural similarity /// 0006915 // apoptosis // inferred from electronic annotation /// 0007049 // cell cycle // inferred from electronic annotation /// 0007059 // chromosome segregation // inferred from electronic annotation /// 000…
1448465_at	316.959	374.91	874.065	299.929	336.652	574.102	-0.000839298	0.255804	1.54883	2.9258	-0.0570609	0.104438	0.959573	1.94473	2	NM_008698	Nipsnap1	4-nitrophenylphosphatase domain and non-neuronal SNAP25-like protein homolog 1 (C. elegans)	18082	chr11 A1
1426447_at	419.411	409.695	459.522	327.168	368.246	315.653	-0.000669257	-0.0166776	0.218084	1.16319	-0.333608	-0.169398	-0.309855	0.806723	2	NM_027091	Nup35	nucleoporin 35	69482	chr2 C3	0006810 // transport // inferred from electronic annotation /// 0015031 // protein transport // inferred from electronic annotation /// 0051028 // mRNA transport // inferred from electronic annotation /// 0065002 // intracellular protein transmembrane transport // inferred from electronic annotation
1452620_at	87.3667	82.6541	251.69	82.2454	88.1462	155.746	-0.000321072	-0.110699	1.61287	3.05859	-0.0648692	0.0322114	0.934078	1.91067	2	NM_028994	Pck2	phosphoenolpyruvate carboxykinase 2 (mitochondrial)	74551	chr14 C1|14 21.0 cM	0006094 // gluconeogenesis // inferred from electronic annotation
1418209_a_at	932.335	740.852	327.783	671.309	763.39	246.809	-0.00102293	-0.333834	-1.42102	0.373449	-0.453764	-0.267929	-1.81412	0.284378	2	NM_019410	Pfn2	profilin 2	18645	chr3 D|3 29.3 cM	0007010 // cytoskeleton organization // inferred from electronic annotation /// 0030036 // actin cytoskeleton organization // inferred from electronic annotation
1426753_at	419.349	368.822	554.773	360.422	327.097	379.054	-0.000449101	-0.167694	0.487212	1.40173	-0.195062	-0.342942	-0.0444716	0.969645	2	NM_001130184 /// NM_001130185 /// NM_001130186 /// NM_172303	Phf17	PHD finger protein 17	269424	chr3 B	0006350 // transcription // inferred from electronic annotation /// 0006355 // regulation of transcription, DNA-dependent // inferred from electronic annotation /// 0006915 // apoptosis // inferred from electronic annotation
1416167_at	1278.3	1385.17	3315.13	1285.99	1349.75	2310.29	-0.000682053	0.133643	1.4614	2.75375	0.0326891	0.0989157	0.953533	1.93661	2	NM_016764	Prdx4	peroxiredoxin 4	53381	chrX F3|X 67.7 cM	0045454 // cell redox homeostasis // inferred from electronic annotation /// 0055114 // oxidation reduction // inferred from electronic annotation
1420843_at	5089.61	5901.47	8689.4	3031.64	3308.24	5130.57	-0.00203805	0.233176	0.859034	1.81382	-0.72969	-0.602465	0.114536	1.08263	2	NM_011213	Ptprf	protein tyrosine phosphatase, receptor type, F	19268	chr4 C6-D1	0006470 // protein amino acid dephosphorylation // inferred from electronic annotation /// 0007155 // cell adhesion // inferred from electronic annotation /// 0007156 // homophilic cell adhesion // inferred from electronic annotation /// 0007399 // nervous system development // inferred from electronic annotation /// 0016311 // dephosphorylation // inferred from electronic annotation
1416230_at	1484.85	1378.93	2987.47	1126.56	1138.48	1809.46	-0.000226316	-0.088786	1.09457	2.1355	-0.376219	-0.364214	0.388807	1.30931	2	NM_019437	Rfk	riboflavin kinase	54391	chr19 B	0009231 // riboflavin biosynthetic process // inferred from electronic annotation
1418318_at	403.52	353.168	2023.69	254.635	293.08	870.191	-0.0213608	-0.182473	2.41062	5.31703	-0.6722	-0.441634	1.20873	2.31135	2	NM_023270	Rnf128	ring finger protein 128	66889	chrX F1	0019941 // modification-dependent protein catabolic process // inferred from electronic annotation /// 0042036 // negative regulation of cytokine biosynthetic process // inferred from direct assay
1421375_a_at	5289.86	5203.22	2966.24	7004.82	6523.42	4802.06	-0.00303274	-0.00645442	-0.752566	0.593547	0.423566	0.319256	-0.0380177	0.973992	2	NM_011313	S100a6	S100 calcium binding protein A6 (calcyclin)	20200	chr3 F1-F2|3 43.6 cM	0007049 // cell cycle // inferred from electronic annotation /// 0008283 // cell proliferation // inferred from electronic annotation	Prostaglandin_synthesis_regulation // GenMAPP
1441573_at	22.1813	19.9149	21.6709	53.7395	50.713	33.2568	-0.00987093	-0.135934	0.0422838	1.02974	1.29355	1.20215	0.676792	1.59858	2	NM_001159630 /// NM_013883	Scmh1	Sex comb on midleg homolog 1 (Scmh1), mRNA	29871	chr4 D1-D2|4 56.5 cM	0006350 // transcription // inferred from electronic annotation /// 0006355 // regulation of transcription, DNA-dependent // inferred from electronic annotation /// 0007275 // multicellular organismal development // inferred from electronic annotation /// 0016458 // gene silencing // inferred from sequence or structural similarity /// 0016481 // negative regulation of transcription // non-traceab…
1425179_at	106.303	122.066	792.871	98.9827	111.5	471.468	-0.0111362	0.218268	2.98422	7.91298	-0.080332	0.0888489	2.2525	4.76509	2	NM_009171	Shmt1	serine hydroxymethyltransferase 1 (soluble)	20425	chr11 B2	0006544 // glycine metabolic process // inferred from electronic annotation /// 0006563 // L-serine metabolic process // inferred from electronic annotation /// 0006730 // one-carbon compound metabolic process // inferred from electronic annotation
1424730_a_at	155.051	162.832	740.832	124.538	150.645	533.403	-0.0038029	0.0850797	2.34175	5.06917	-0.32351	-0.0222636	1.88501	3.69354	2	NM_001145899 /// NM_021301	Slc15a2	solute carrier family 15 (H+/peptide transporter), member 2	57738	chr16 B3	0006810 // transport // inferred from electronic annotation /// 0006857 // oligopeptide transport // inferred from direct assay /// 0006857 // oligopeptide transport // inferred from electronic annotation /// 0015031 // protein transport // inferred from electronic annotation
1454622_at	1059.66	896.527	125.497	1318.95	1277.96	277.572	-0.00238146	-0.22333	-3.00123	0.124894	0.340627	0.288344	-1.84898	0.277589	2	NM_172479	Slc38a5	solute carrier family 38, member 5	209837	chrX A1.1
1440834_at	68.9152	79.5721	90.035	65.0209	70.9344	72.4068	-0.000974423	0.1948	0.471841	1.38688	-0.059326	0.0528588	0.174144	1.1283	2	NM_001033227	Slc5a10	solute carrier family 5 (sodium/glucose cotransporter), member 10	109342	chr11 B2	0006810 // transport // inferred from electronic annotation /// 0006811 // ion transport // inferred from electronic annotation /// 0006814 // sodium ion transport // inferred from electronic annotation
1448829_at	518.557	435.964	292.604	607.149	553.164	398.906	-0.00105056	-0.248657	-0.740579	0.598499	0.249009	0.105841	-0.275768	0.82601	2	NM_025695	Smc6	structural maintenance of chromosomes 6	67241	chr12 A2	0006281 // DNA repair // inferred from electronic annotation /// 0006310 // DNA recombination // inferred from electronic annotation /// 0006974 // response to DNA damage stimulus // inferred from electronic annotation
1418076_at	548.265	628.282	1696.02	471.803	592.568	1248.89	-0.00974901	0.214104	1.7162	3.28571	-0.195583	0.126706	1.29122	2.44735	2	NM_011176	St14	suppression of tumorigenicity 14 (colon carcinoma)	19143	chr9 A4|9 17.0 cM	0006508 // proteolysis // inferred from electronic annotation /// 0016477 // cell migration // traceable author statement
1436797_a_at	737.529	758.279	1184.32	633.808	657.842	943.833	-0.0020962	0.0598698	0.770158	1.70546	-0.193352	-0.144231	0.458778	1.37438	2	NM_011512	Surf4	surfeit gene 4	20932	chr2 A3|2 15.5 cM
1448101_s_at	661.738	635.461	1190.7	582.815	599.419	808.136	-0.00144022	-0.0426218	0.931474	1.90722	-0.163391	-0.124469	0.391658	1.3119	2	NM_009054	Trim27	tripartite motif-containing 27	19720	chr13 A3.1|13 10.0 cM	0000122 // negative regulation of transcription from RNA polymerase II promoter // not recorded /// 0006350 // transcription // inferred from electronic annotation /// 0006355 // regulation of transcription, DNA-dependent // inferred from electronic annotation /// 0045814 // negative regulation of gene expression, epigenetic // not recorded
1421529_a_at	1079.11	1029.66	1381.36	563.074	603.52	838.194	-0.000354672	-0.0497984	0.44322	1.35964	-0.913647	-0.818825	-0.260871	0.834584	2	NM_001042513 /// NM_001042514 /// NM_001042523 /// NM_015762	Txnrd1	thioredoxin reductase 1	50493	chr10 C1	0001707 // mesoderm formation // inferred from mutant phenotype /// 0006979 // response to oxidative stress // inferred from electronic annotation /// 0007369 // gastrulation // inferred from mutant phenotype /// 0008283 // cell proliferation // inferred from mutant phenotype /// 0042744 // hydrogen peroxide catabolic process // inferred from electronic annotation /// 0045454 // cell redox homeos…
1424432_at	307.773	347.96	327.282	464.3	545.484	544.458	-0.00184619	0.182116	0.156297	1.11442	0.613105	0.845607	0.921903	1.89461	2	NM_145500	Ubtd1	ubiquitin domain containing 1	226122	chr19 C3	0006464 // protein modification process // inferred from electronic annotation
1419374_at	461.622	460.24	496.939	512.987	479.96	549.071	-0.000908945	0.0107743	0.191961	1.14232	0.176534	0.0746127	0.353202	1.27739	2	NM_018765	Wbp4	WW domain binding protein 4	22380	chr14 D3	0006397 // mRNA processing // inferred from electronic annotation /// 0008380 // RNA splicing // inferred from electronic annotation	mRNA_processing_binding_Reactome // GenMAPP
1434501_at	25.5883	21.8717	74.9909	22.1533	23.5222	30.9316	-0.00183974	-0.20691	1.62755	3.08988	-0.185673	-0.102083	0.377122	1.29875	2	NM_001005342	Ypel4	yippee-like 4 (Drosophila)	241525	chr2 D
1453684_s_at	773.523	643.394	1126.78	542.947	584.601	638.548	-0.00121868	-0.267351	0.616895	1.53357	-0.488686	-0.388378	-0.174789	0.885897	2	NM_026934	Zc3h15	zinc finger CCCH-type containing 15	69082	chr2 E1	0019221 // cytokine-mediated signaling pathway // inferred from direct assay
1425584_x_at	117.915	129.374	128.252	169.477	171.641	193.953	-0.00534177	0.14512	0.194822	1.14458	0.53938	0.560165	0.820035	1.76545	2
1457610_at	163.313	161.362	175.599	173.052	162.333	238.498	-0.00295486	-0.00218025	0.190625	1.14126	0.105357	0.0116332	0.650466	1.56968	2
1459556_at	41.2994	36.2262	59.7431	32.4352	36.1136	35.7097	-0.00736428	-0.182354	0.611847	1.52821	-0.324941	-0.180611	-0.118774	0.92097	2
1454126_at	26.5719	27.5004	144.128	23.388	26.8016	56.6467	-0.000317046	0.0672001	2.51939	5.73338	-0.160397	0.0318924	1.19441	2.2885	3		0710001A04Rik	RIKEN cDNA 0710001A04 gene	68402
1421682_a_at	43.1683	43.309	32.611	55.1376	57.0474	36.9175	-0.000316107	0.0164018	-0.320475	0.800806	0.37742	0.419247	-0.124571	0.917277	3	NM_001123367 /// NM_001123368 /// NM_011560 /// NM_198104 /// XM_001477686 /// XM_001477697 /// XM_001477804 /// XM_001477817	100041586 /// 100041639 /// Tcte3	predicted gene, 100041586 /// predicted gene, 100041639 /// t-complex-associated testis expressed 3	100041586 /// 100041639 /// 21647	chr17 A2 /// chr17 A2|17 /// chr17 A2|17 8.16 cM	0007018 // microtubule-based movement // inferred from direct assay
1436786_at	12876.1	11782.6	2743.88	14074.9	13603.5	4860.78	-0.000166458	-0.108607	-2.1491	0.225453	0.153072	0.0995614	-1.30585	0.404484	3		1110069O07Rik	RIKEN cDNA 1110069O07 gene	71798
1428851_at	430.317	517.544	293.717	2518.53	2240.68	837.138	-0.000982327	0.28006	-0.46644	0.723748	2.563	2.40066	1.06135	2.08688	3	NM_025831	1300014I06Rik	RIKEN cDNA 1300014I06 gene	66895	chr13 A4|13	0007154 // cell communication // inferred from electronic annotation
1423266_at	375.723	383.895	260.802	543.432	481.188	280.135	-0.0015198	0.0422436	-0.447483	0.733321	0.556951	0.374861	-0.323809	0.798958	3	NM_025582	2810405K02Rik	RIKEN cDNA 2810405K02 gene	66469	chr4 E2
1460172_at	770.456	779.665	622.118	912.397	877.199	683.946	-0.000824328	0.0238975	-0.223903	0.856246	0.268536	0.206956	-0.0689228	0.95335	3	NM_025670	5730403B10Rik	RIKEN cDNA 5730403B10 gene	66626	chr16 A1|16 2.7 cM	0006915 // apoptosis // not recorded /// 0006917 // induction of apoptosis // not recorded /// 0006917 // induction of apoptosis // inferred from electronic annotation /// 0033209 // tumor necrosis factor-mediated signaling pathway // not recorded /// 0033209 // tumor necrosis factor-mediated signaling pathway // inferred from electronic annotation /// 0042771 // DNA damage response, signal trans…
1425102_a_at	366.579	290.385	1468.19	316.972	374.338	747.895	-0.00821167	-0.360709	2.0787	4.22425	-0.188753	0.0487203	1.12938	2.18765	3	NM_001130513 /// NM_027286	Ace2	angiotensin I converting enzyme (peptidyl-dipeptidase A) 2	70008	chrX F5|X 70.5 cM	0003051 // angiotensin-mediated drinking behavior // inferred from electronic annotation /// 0003081 // regulation of systemic arterial blood pressure by renin-angiotensin // inferred from electronic annotation /// 0006508 // proteolysis // inferred from electronic annotation /// 0032800 // receptor biosynthetic process // inferred from electronic annotation /// 0046813 // virion attachment, bind…
1429273_at	614.238	622.756	170.251	935.822	857.53	240.583	-0.00222392	0.0140419	-1.76775	0.293667	0.630154	0.501252	-1.25207	0.419845	3	NM_028472	Bmper	BMP-binding endothelial regulator	73230	chr9 A4	0030514 // negative regulation of BMP signaling pathway // inferred from direct assay
1450131_a_at	363.673	365.562	1089.63	282.218	321.805	636.5	-0.00208385	0.022444	1.66571	3.1727	-0.34264	-0.156225	0.909723	1.87869	3	NM_138653	Bspry	B-box and SPRY domain containing	192120	chr4 C1	0006810 // transport // inferred from electronic annotation /// 0006811 // ion transport // inferred from electronic annotation /// 0006816 // calcium ion transport // inferred from electronic annotation
1417268_at	1066.22	816.622	4239.48	464.496	620.399	2672.27	-0.00968694	-0.388068	2.07393	4.21031	-1.17272	-0.760576	1.42322	2.68183	3	NM_009841	Cd14	CD14 antigen	12475	chr18 B2|18 31.0 cM	0002237 // response to molecule of bacterial origin // inferred from direct assay /// 0006954 // inflammatory response // inferred from electronic annotation /// 0006955 // immune response // inferred from electronic annotation
1443664_s_at	47.6229	51.5473	217.028	46.1155	49.5017	120.819	-0.0063273	0.132645	2.27403	4.83673	-0.0302743	0.075391	1.44039	2.71394	3	NM_027152	Cd164l2	CD164 sialomucin-like 2	69655	chr4 D3
1435338_at	886.993	969.337	417.468	1180.84	1271.3	652.18	-0.00122312	0.146979	-1.01276	0.495598	0.43254	0.538787	-0.340941	0.789526	3	NM_009873	Cdk6	cyclin-dependent kinase 6	12571	chr5 A2-A3|5 1.0 cM	0006468 // protein amino acid phosphorylation // inferred from electronic annotation /// 0007049 // cell cycle // inferred from electronic annotation /// 0030097 // hemopoiesis // inferred from mutant phenotype /// 0051301 // cell division // inferred from electronic annotation
1452981_at	126.79	68.1116	45.7661	206.972	102.898	55.7033	-0.00107001	-0.912555	-1.3864	0.382517	0.731423	-0.282565	-1.08909	0.470056	3	NM_001159647 /// NM_001159648 /// NM_007727	Cntn1	contactin 1	12805	chr15 F|15 55.1 cM	0007155 // cell adhesion // inferred from electronic annotation /// 0007219 // Notch signaling pathway // inferred from electronic annotation
1438779_at	832.615	774.732	520.621	995.735	915.128	799.897	-0.00201515	-0.0888974	-0.592244	0.66331	0.276381	0.155676	0.0431042	1.03033	3	NM_007734	Col4a3	collagen, type IV, alpha 3	12828	chr1 C5	0006917 // induction of apoptosis // inferred from sequence or structural similarity /// 0006919 // activation of caspase activity // inferred from sequence or structural similarity /// 0007155 // cell adhesion // inferred from electronic annotation /// 0007166 // cell surface receptor linked signal transduction // inferred from direct assay /// 0008283 // cell proliferation // inferred from sequ…	mRNA_processing_binding_Reactome // GenMAPP
1415948_at	1965.03	1887.8	2155.77	1476.09	1407.89	1681.86	-0.00272367	-0.0413233	0.218677	1.16367	-0.388979	-0.464953	-0.121815	0.919031	3	NM_011804	Creg1	cellular repressor of E1A-stimulated genes 1	433375	chr1 H2.3	0006355 // regulation of transcription, DNA-dependent // inferred from direct assay /// 0040008 // regulation of growth // inferred from electronic annotation
1438610_a_at	588.9	612.747	724.77	741.611	750.603	765.388	-0.000305725	0.0559154	0.384466	1.30538	0.356904	0.366005	0.480965	1.39568	3	NM_009968	Cryz	crystallin, zeta	12972	chr3 H4	0008152 // metabolic process // inferred from electronic annotation /// 0055114 // oxidation reduction // inferred from electronic annotation
1438148_at	100.032	24.3859	545.487	23.5998	16.3299	62.8342	-0.276351	-2.06266	2.52013	5.73635	-2.11546	-2.60383	-0.599802	0.659844	3	NM_203320	Cxcl3	chemokine (C-X-C motif) ligand 3	330122	chr5 E1	0006935 // chemotaxis // inferred from electronic annotation /// 0006954 // inflammatory response // inferred from electronic annotation /// 0006955 // immune response // inferred from electronic annotation /// 0030593 // neutrophil chemotaxis // inferred from direct assay
1418183_a_at	730.416	705.056	593.396	805.78	813.949	704.762	-0.000614388	-0.0323718	-0.215301	0.861366	0.165791	0.17457	0.0515408	1.03637	3	NM_001112699 /// NM_001112700 /// NM_011180	Cyth1	cytohesin 1	19157	chr11 E2	0030155 // regulation of cell adhesion // inferred from electronic annotation /// 0032012 // regulation of ARF protein signal transduction // inferred from electronic annotation
1437085_at	241.874	230.11	650.356	209.799	222.352	473.796	-0.00408629	-0.0616634	1.51422	2.85644	-0.184305	-0.100263	1.07309	2.10394	3	NM_178727	D630039A03Rik	RIKEN cDNA D630039A03 gene	242484	chr4 B3
1426915_at	1565.36	1354.4	2006.36	1071.07	1066.27	1731.8	-0.0024252	-0.19097	0.444312	1.36066	-0.526491	-0.534301	0.247248	1.18694	3	NM_029653 /// NM_134062	Dapk1	death associated protein kinase 1	69635	chr13 B2|13 40.0 cM	0006468 // protein amino acid phosphorylation // inferred from direct assay /// 0006468 // protein amino acid phosphorylation // inferred from electronic annotation /// 0006915 // apoptosis // inferred from electronic annotation /// 0006916 // anti-apoptosis // inferred from mutant phenotype /// 0007165 // signal transduction // inferred from electronic annotation /// 0007243 // protein kinase ca…
1428781_at	948.044	1213.25	12941.9	570.413	767.415	9197.33	-0.0163497	0.364872	3.85725	14.4927	-0.731349	-0.284999	3.38282	10.4311	3	NM_028618 /// NM_172899	Dmkn	dermokine	73712	chr7 A3	0030154 // cell differentiation // inferred from electronic annotation
1444058_at	30.8036	26.0322	50.1405	24.2661	27.1849	32.3631	-0.00599063	-0.262763	0.785628	1.72384	-0.323438	-0.164521	0.169258	1.12448	3	NM_001110017 /// NM_027341	Dzip3	DAZ interacting protein 3, zinc finger	224170	chr16 B5	0000209 // protein polyubiquitination // inferred from electronic annotation /// 0019941 // modification-dependent protein catabolic process // inferred from electronic annotation
1424344_s_at	608.646	562.591	740.446	520.857	560.107	622.432	-0.000254778	-0.0941078	0.369348	1.29177	-0.202226	-0.101337	0.13536	1.09837	3	NM_010120	Eif1a	eukaryotic translation initiation factor 1A	13664	chr18 C	0006412 // translation // inferred from electronic annotation /// 0006413 // translational initiation // inferred from electronic annotation	Translation_Factors // GenMAPP
1424098_at	75.5586	64.9865	302.073	62.6538	63.3569	156.823	-0.00135494	-0.228758	2.08368	4.23887	-0.251867	-0.233341	1.12488	2.18084	3	NM_029001	Elovl7	ELOVL family member 7, elongation of long chain fatty acids (yeast)	74559	chr13 D2.1	0006633 // fatty acid biosynthetic process // inferred from electronic annotation /// 0008610 // lipid biosynthetic process // inferred from electronic annotation
1434263_at	466.309	538.022	539.887	528.06	594.675	669.193	-0.00192649	0.224121	0.297448	1.22897	0.203014	0.367806	0.623739	1.54086	3	NM_028657	F630110N24Rik	RIKEN cDNA F630110N24 gene	73822	chr10 C1	0006810 // transport // inferred from electronic annotation
1438641_x_at	119.158	140.532	70.1454	178.148	140.251	79.1519	-0.000487325	0.256995	-0.692573	0.618749	0.605104	0.255446	-0.490473	0.711792	3	NM_001146347 /// NM_026884 /// NM_029978 /// XM_001480258 /// XM_924242	Fam57b	family with sequence similarity 57, member B	68952	chr7 F4
1426570_a_at	60.1101	52.921	282.62	45.8827	69.3046	196.458	-0.00123569	-0.297253	2.31856	4.98834	-0.374324	0.211064	1.81031	3.50717	3	NM_001159544 /// NM_010237	Frk	fyn-related kinase	14302	chr10 B1	0006468 // protein amino acid phosphorylation // inferred from electronic annotation
1448354_at	844.429	933.081	1282.41	733.216	769.776	861.785	-0.00207815	0.162842	0.688781	1.61192	-0.19256	-0.115231	0.132376	1.0961	3	NM_008062	G6pdx	glucose-6-phosphate dehydrogenase X-linked	14381	chrX A2-A3|X 30.02 cM	0001816 // cytokine production // inferred from mutant phenotype /// 0001998 // angiotensin mediated vasoconstriction involved in regulation of systemic arterial blood pressure // inferred from mutant phenotype /// 0002033 // vasodilation by angiotensin involved in regulation of systemic arterial blood pressure // inferred from mutant phenotype /// 0005975 // carbohydrate metabolic process // inf…	Pentose_Phosphate_Pathway // GenMAPP
1455959_s_at	2258.95	2221.29	3470.62	1157.83	1231.46	2656.7	-0.000483756	-0.00597069	0.703026	1.62792	-0.941015	-0.855102	0.333294	1.25989	3	NM_010295	Gclc	Glutamate-cysteine ligase, catalytic subunit, mRNA (cDNA clone MGC:30487 IMAGE:4195425)	14629	chr9 D-E|9 42.0 cM	0006534 // cysteine metabolic process // inferred from electronic annotation /// 0006534 // cysteine metabolic process // inferred from sequence or structural similarity /// 0006536 // glutamate metabolic process // inferred from electronic annotation /// 0006536 // glutamate metabolic process // inferred from sequence or structural similarity /// 0006749 // glutathione metabolic process // infer…
1450881_s_at	1496.85	1479.64	1064.71	1836.84	1946.22	1537.23	-0.00098437	-0.000273938	-0.407767	0.753789	0.316012	0.397407	0.140118	1.102	3	NM_031999	Gpr137b	G protein-coupled receptor 137B	83924	chr13 A1|13 6.0 cM
1433485_x_at	520.268	592.514	2139.85	460.166	508.15	1638.52	-0.0015379	0.189782	2.12662	4.36692	-0.156712	-0.0129633	1.75572	3.37695	3	NM_018882	Gpr56	G protein-coupled receptor 56	14766	chr8 D1|8 45.0 cM	0007165 // signal transduction // inferred from electronic annotation /// 0007166 // cell surface receptor linked signal transduction // inferred from electronic annotation /// 0007186 // G-protein coupled receptor protein signaling pathway // inferred from electronic annotation /// 0007218 // neuropeptide signaling pathway // inferred from electronic annotation	GPCRDB_Other // GenMAPP
1439566_at	108.878	63.9551	185.943	47.2448	81.8586	74.3285	-0.0280356	-0.789962	0.85324	1.80655	-1.1881	-0.400479	-0.457539	0.728227	3	NM_183183	Gprin3	GPRIN family member 3	243385	chr6 B3
1448330_at	5573.29	5000.68	2631.51	2491.02	2177.36	1016.96	-0.000450746	-0.136454	-0.997786	0.500768	-1.13682	-1.33763	-2.35097	0.196014	3	NM_010358	Gstm1	glutathione S-transferase, mu 1	14862	chr3 F2.3	0008152 // metabolic process // inferred from electronic annotation
1419869_s_at	2237.99	1964.09	2499.6	1964.17	1908.14	2050.25	-0.00232728	-0.169572	0.246699	1.18649	-0.163053	-0.209463	-0.0232409	0.98402	3	NM_133808	Hdlbp	high density lipoprotein (HDL) binding protein	110611	chr1 D|1 55.3 cM	0006629 // lipid metabolic process // inferred from electronic annotation /// 0006810 // transport // inferred from electronic annotation /// 0006869 // lipid transport // inferred from electronic annotation /// 0008202 // steroid metabolic process // inferred from electronic annotation /// 0008203 // cholesterol metabolic process // inferred from electronic annotation
1425900_at	230.023	252.518	875.17	233.984	256.095	599.003	-0.00278278	0.148776	2.01493	4.04161	0.0485978	0.175629	1.47653	2.78279	3	NM_145419	Hkdc1	hexokinase domain containing 1	216019	chr10 B4	0005975 // carbohydrate metabolic process // inferred from electronic annotation /// 0006096 // glycolysis // inferred from electronic annotation
1421224_a_at	140.467	109.351	504.933	127.117	129.801	366.484	-0.0016886	-0.346311	1.93101	3.81323	-0.119296	-0.0935409	1.48337	2.79601	3	NM_009330	Hnf1b	HNF1 homeobox B	21410	chr11 C|11 44.0 cM	0001822 // kidney development // inferred from sequence or structural similarity /// 0001822 // kidney development // inferred from electronic annotation /// 0001826 // inner cell mass cell differentiation // inferred from mutant phenotype /// 0006350 // transcription // inferred from electronic annotation /// 0006355 // regulation of transcription, DNA-dependent // inferred from electronic annot…
1450729_at	3781.87	4143.09	2376.33	4683.11	5076.94	3480.96	-0.00241403	0.146435	-0.586768	0.665833	0.32704	0.444647	-0.0168087	0.988417	3	NM_011828	Hs2st1	heparan sulfate 2-O-sulfotransferase 1	23908	chr3 H2	0015014 // heparan sulfate proteoglycan biosynthetic process, polysaccharide chain biosynthetic process // inferred from mutant phenotype /// 0030202 // heparin metabolic process // inferred from mutant phenotype
1454905_at	380.024	320.423	639.723	345.502	333.97	379.671	-0.000758891	-0.232875	0.838238	1.78786	-0.11346	-0.16852	0.0991614	1.07115	3	NM_001081282	Ibtk	inhibitor of Bruton agammaglobulinemia tyrosine kinase	108837	chr9 E3.1	0001933 // negative regulation of protein amino acid phosphorylation // not recorded /// 0051209 // release of sequestered calcium ion into cytosol // not recorded
1415977_at	811.401	733.81	1518.97	654.875	708.004	1056.21	-0.00498083	-0.132012	0.991385	1.98809	-0.29009	-0.17726	0.483843	1.39846	3	NM_023627	Isyna1	myo-inositol 1-phosphate synthase A1	71780	chr8 B3.3	0006021 // inositol biosynthetic process // inferred from electronic annotation /// 0008152 // metabolic process // inferred from electronic annotation /// 0008654 // phospholipid biosynthetic process // inferred from electronic annotation
1455293_at	264.617	253.056	351.84	188.143	177.257	238.474	-0.00886542	-0.0452708	0.495127	1.40944	-0.47387	-0.560042	-0.0481752	0.967159	3	NM_001039522	Leo1	Leo1, Paf1/RNA polymerase II complex component, homolog (S. cerevisiae)	235497	chr9 D	0006350 // transcription // inferred from electronic annotation /// 0006355 // regulation of transcription, DNA-dependent // inferred from electronic annotation
1457026_at	655.363	514.157	964.77	410.981	403.369	712.222	-0.00283441	-0.329965	0.643163	1.56175	-0.648768	-0.694726	0.218824	1.16378	3	NM_001083894 /// NM_153404	Liph	lipase, member H	239759	chr16 B1|16 14.8 cM	0006629 // lipid metabolic process // inferred from electronic annotation /// 0016042 // lipid catabolic process // inferred from electronic annotation	Statin_Pathway_PharmGKB // GenMAPP
1452226_at	246.861	252.358	608.802	240.886	250.074	457.328	-0.00135379	0.0366005	1.38869	2.61841	-0.0125852	0.036536	0.988815	1.98455	3	NM_173867 /// XM_001477942	LOC100047340 /// Rcc2	hypothetical protein LOC100047340 /// regulator of chromosome condensation 2	100047340 /// 108911	chr4 D3	0007049 // cell cycle // inferred from electronic annotation /// 0007067 // mitosis // inferred from electronic annotation /// 0051301 // cell division // inferred from electronic annotation
1424426_at	249.076	227.091	516.562	256.274	257.772	342.813	-0.00148343	-0.117863	1.13766	2.20024	0.0622902	0.0700359	0.564152	1.47852	3	NM_024433	Mtap	methylthioadenosine phosphorylase	66902	chr4 C4	0009116 // nucleoside metabolic process // inferred from electronic annotation
1417774_at	251.135	225.36	477.498	206.612	224.227	330.258	-0.004625	-0.149471	1.01317	2.01834	-0.26314	-0.142693	0.498205	1.41246	3	NM_053179	Nans	N-acetylneuraminic acid synthase (sialic acid synthase)	94181	chr4 B2	0008152 // metabolic process // inferred from electronic annotation /// 0016051 // carbohydrate biosynthetic process // inferred from electronic annotation
1417385_at	573.411	467.068	748.951	475.637	556.11	487.93	-0.000292197	-0.277204	0.472265	1.38729	-0.24919	-0.0249492	-0.134229	0.911156	3	NM_008942	Npepps	aminopeptidase puromycin sensitive	19155	chr11 D|11 56.0 cM	0006508 // proteolysis // inferred from electronic annotation
1428073_a_at	1081.1	979.511	1333.68	971.107	1006.25	1085.67	-0.000622455	-0.123006	0.387635	1.30825	-0.130041	-0.0855682	0.109432	1.0788	3	NM_001083331 /// NM_172394	Nup88	nucleoporin 88	19069	chr11 B4|11 42.0 cM	0006810 // transport // inferred from electronic annotation /// 0015031 // protein transport // inferred from electronic annotation /// 0051028 // mRNA transport // inferred from electronic annotation /// 0065002 // intracellular protein transmembrane transport // inferred from electronic annotation
1419663_at	6699.53	6267.14	590.476	7946.62	6821.71	1507.49	-0.0035764	-0.0842622	-3.41972	0.0934459	0.270752	0.0441885	-2.06337	0.239256	3	NM_008760	Ogn	osteoglycin	18295	chr13 A5
1424022_at	350.96	335.106	804.018	221.994	229.294	501.408	-0.000887434	-0.0489758	1.27794	2.42493	-0.636171	-0.596021	0.617742	1.53447	3	NM_027950	Osgin1	oxidative stress induced growth inhibitor 1	71839	chr8 E1
1439849_at	188.471	164.668	157.468	302.921	291.099	205.511	-0.00248127	-0.17844	-0.192059	0.875355	0.704903	0.646293	0.227956	1.17117	3	NM_001085549 /// XM_981216	OTTMUSG00000008561	predicted gene, OTTMUSG00000008561	666048	chr4 D1|4
1425615_a_at	597.68	611.572	1897.33	570.096	619.141	1223.19	-0.00126749	0.0494671	1.75038	3.36446	-0.0456769	0.0710908	1.13478	2.19585	3	NM_028994	Pck2	phosphoenolpyruvate carboxykinase 2 (mitochondrial)	74551	chr14 C1|14 21.0 cM	0006094 // gluconeogenesis // inferred from electronic annotation
1423706_a_at	1091.27	1140.16	1854.73	898.332	874.194	1362.69	-0.00107453	0.0831604	0.851413	1.80427	-0.275275	-0.300191	0.423717	1.34138	3	NM_001081274	Pgd	phosphogluconate dehydrogenase	110208	chr4 E2|4 77.6 cM	0006098 // pentose-phosphate shunt // inferred from electronic annotation /// 0008152 // metabolic process // inferred from electronic annotation /// 0009051 // pentose-phosphate shunt, oxidative branch // inferred from electronic annotation /// 0019322 // pentose biosynthetic process // inferred from direct assay /// 0055114 // oxidation reduction // inferred from electronic annotation	Pentose_Phosphate_Pathway // GenMAPP
1450727_a_at	296.538	551.121	1122.17	528.368	561.131	960.427	-0.0173798	0.914566	2.00827	4.023	0.857054	0.939482	1.79997	3.48214	3	NM_026389	Poldip2	polymerase (DNA-directed), delta interacting protein 2	67811	chr11 B5
1434475_at	275.84	181.648	171.001	216.347	242.404	139.915	-0.00220903	-0.618903	-0.605154	0.657401	-0.326758	-0.173713	-0.879032	0.543732	3	NM_001081086	Ppig	peptidyl-prolyl isomerase G (cyclophilin G)	228005	chr2 C2	0006457 // protein folding // inferred from electronic annotation
1422468_at	773.632	798.87	1011.87	833.217	952.726	1594.6	-0.0052194	0.0574564	0.471985	1.38702	0.125619	0.318942	1.14548	2.2122	3	NM_008917	Ppt1	palmitoyl-protein thioesterase 1	19063	chr4 D1-D3|4 59.1 cM	0002084 // protein depalmitoylation // inferred from mutant phenotype /// 0002084 // protein depalmitoylation // inferred from sequence or structural similarity /// 0006309 // DNA fragmentation involved in apoptosis // inferred from sequence or structural similarity /// 0006464 // protein modification process // inferred from electronic annotation /// 0006898 // receptor-mediated endocytosis // n…
1416000_a_at	8645.39	9279.55	11604.3	7750.88	8093.77	9913.9	-0.000681202	0.120797	0.511056	1.42509	-0.133328	-0.0751694	0.300243	1.23135	3	NM_011034	Prdx1	peroxiredoxin 1	18477	chr4 D1|4 47.0 cM	0000302 // response to reactive oxygen species // inferred from mutant phenotype /// 0006979 // response to oxidative stress // inferred from direct assay /// 0006979 // response to oxidative stress // inferred from mutant phenotype /// 0008283 // cell proliferation // inferred from mutant phenotype /// 0019430 // removal of superoxide radicals // inferred from mutant phenotype /// 0032872 // reg…
1420841_at	1777.44	1907.15	3667.01	864.343	917.159	1801.9	-0.000857029	0.120881	1.12945	2.18775	-1.01478	-0.941775	0.123012	1.08901	3	NM_011213	Ptprf	protein tyrosine phosphatase, receptor type, F	19268	chr4 C6-D1	0006470 // protein amino acid dephosphorylation // inferred from electronic annotation /// 0007155 // cell adhesion // inferred from electronic annotation /// 0007156 // homophilic cell adhesion // inferred from electronic annotation /// 0007399 // nervous system development // inferred from electronic annotation /// 0016311 // dephosphorylation // inferred from electronic annotation
1426477_at	853.541	741.315	739.751	773.87	781.511	582.334	-0.000752316	-0.188007	-0.120554	0.919835	-0.11681	-0.107773	-0.448717	0.732694	3	NM_145452	Rasa1	RAS p21 protein activator 1	218397	chr13 C3	0001570 // vasculogenesis // inferred from mutant phenotype /// 0001570 // vasculogenesis // inferred from sequence or structural similarity /// 0001953 // negative regulation of cell-matrix adhesion // inferred from electronic annotation /// 0001953 // negative regulation of cell-matrix adhesion // inferred from sequence or structural similarity /// 0007162 // negative regulation of cell adhesio…
1449028_at	304.221	251.519	798.422	192.821	194.68	409.333	-0.000510133	-0.255927	1.47745	2.78456	-0.645024	-0.635277	0.525945	1.43988	3	NM_133955	Rhou	ras homolog gene family, member U	69581	chr8 E2	0000082 // G1/S transition of mitotic cell cycle // inferred from direct assay /// 0007264 // small GTPase mediated signal transduction // inferred from electronic annotation /// 0008360 // regulation of cell shape // inferred from direct assay /// 0016601 // Rac protein signal transduction // inferred from direct assay /// 0030036 // actin cytoskeleton organization // inferred from direct assay
1441963_at	236.458	222.592	135.564	261.41	259.009	176.634	-0.000187521	-0.07487	-0.718415	0.607765	0.168605	0.15163	-0.318346	0.801989	3	NM_197945	RP23-100C5.8	ProSAPiP1 protein	241638	chr2 F1
1425088_at	2494.56	2384.45	1070.43	3012.71	2599.71	1452.28	-0.000205906	-0.0456481	-1.15187	0.45004	0.296458	0.0801565	-0.677381	0.625299	3	NM_011324	Scnn1a	sodium channel, nonvoltage-gated 1 alpha	20276	chr6 F3|6 60.6 cM	0006810 // transport // inferred from electronic annotation /// 0006811 // ion transport // inferred from electronic annotation /// 0006814 // sodium ion transport // inferred from direct assay /// 0006814 // sodium ion transport // inferred from genetic interaction /// 0006814 // sodium ion transport // inferred from electronic annotation /// 0050896 // response to stimulus // inferred from elec…
1426883_at	566.737	594.496	893.627	519.118	591.173	700.683	-0.00155078	0.0890748	0.744174	1.67501	-0.101149	0.0799086	0.40904	1.3278	3	NM_134154	Slc25a45	solute carrier family 25, member 45	107375	chr19 A	0006810 // transport // inferred from electronic annotation
1438183_x_at	113.791	90.2441	121.759	205.372	173.585	252.642	-0.00931406	-0.435525	0.171227	1.12602	0.874738	0.619192	1.24834	2.37568	3	NM_146126	Sord	sorbitol dehydrogenase	20322	chr2 E5|2 66.0 cM	0006060 // sorbitol metabolic process // inferred from direct assay /// 0006062 // sorbitol catabolic process // inferred from electronic annotation /// 0008152 // metabolic process // inferred from electronic annotation /// 0046370 // fructose biosynthetic process // inferred from electronic annotation /// 0051160 // L-xylitol catabolic process // inferred from electronic annotation /// 0055114 …
1451342_at	4185.79	4147.33	959.883	4668.76	4534.49	1710.88	-0.000701563	0.00181554	-2.04088	0.243016	0.182292	0.135301	-1.19	0.438303	3	NM_145584	Spon1	spondin 1, (f-spondin) extracellular matrix protein	233744	chr7 F1	0007155 // cell adhesion // inferred from electronic annotation
1424175_at	1482.82	1412.6	514.701	2589.86	2577.22	1355.29	-0.0593202	-0.0513818	-1.44814	0.366494	0.823504	0.816792	-0.0271108	0.981384	3	NM_017376 /// NM_153484	Tef	thyrotroph embryonic factor	21685	chr15 E1|15 46.7 cM	0006350 // transcription // inferred from electronic annotation /// 0006355 // regulation of transcription, DNA-dependent // inferred from electronic annotation /// 0045944 // positive regulation of transcription from RNA polymerase II promoter // inferred from direct assay /// 0048511 // rhythmic process // inferred from electronic annotation
1434317_s_at	242.977	220.915	286.935	235.139	245.029	241.962	-0.00010705	-0.12178	0.326378	1.25386	-0.0229567	0.0270035	0.0965217	1.06919	3	NM_172304	Tex10	testis expressed gene 10	269536	chr4 B1
1419089_at	5517.44	5208.08	1792.93	6257.61	5943.68	3229.07	-0.00236824	-0.0642704	-1.54133	0.34357	0.204896	0.125115	-0.672572	0.627387	3	NM_011595	Timp3	tissue inhibitor of metalloproteinase 3	21859	chr10 C1|10 C1-D1|10 47.0 cM	0007169 // transmembrane receptor protein tyrosine kinase signaling pathway // non-traceable author statement /// 0014070 // response to organic cyclic substance // inferred from electronic annotation /// 0042246 // tissue regeneration // inferred from electronic annotation /// 0043627 // response to estrogen stimulus // inferred from electronic annotation	Matrix_Metalloproteinases // GenMAPP
1417896_at	209.053	243.99	446.416	148.187	176.792	279.954	-0.00638997	0.231341	1.18078	2.26699	-0.473848	-0.220884	0.525423	1.43936	3	NM_013769	Tjp3	tight junction protein 3	27375	chr10 C1
1435948_at	342.414	332.886	538.477	254.316	282.66	416.086	-0.000822303	-0.0296753	0.740255	1.67047	-0.410768	-0.256627	0.379883	1.30124	3	NM_001033178 /// XR_031953	Tmem181 /// Tmem181c-ps	transmembrane protein 181 /// transmembrane protein 181C, pseudogene	100040525 /// 77106	chr17 A1 /// chr17 A1|17
1417895_a_at	45.5178	61.0034	414.59	40.9037	48.0879	196.395	-0.0180598	0.416607	3.26899	9.63972	-0.131858	0.0978042	2.21066	4.62887	3	NM_025452	Tmem54	transmembrane protein 54	66260	chr4 D2.2
1453285_at	470.344	499.401	352.705	599.175	643.788	414.741	-0.00106369	0.0907239	-0.329356	0.795892	0.374284	0.472462	-0.0804578	0.945758	3	NM_025915	Tmem88	transmembrane protein 88	67020	chr11 B4
1442590_at	175.538	168.689	374.266	163.867	177.111	261.182	-0.00139941	-0.0620749	1.17835	2.26317	-0.0743389	0.0306811	0.673903	1.59538	3	NM_023680 /// NM_024290	Tnfrsf22 /// Tnfrsf23	tumor necrosis factor receptor superfamily, member 22 /// tumor necrosis factor receptor superfamily, member 23	79201 /// 79202	chr7 F5|7 69.56 cM /// chr7 F5|7 69.57 cM	0042981 // regulation of apoptosis // inferred from direct assay
1457149_at	68.8122	78.2813	103.934	57.309	64.5132	73.5987	-0.00530866	0.197501	0.679676	1.60178	-0.241942	-0.0739236	0.19776	1.14692	3	NM_177667	Ttc22	tetratricopeptide repeat domain 22	230576	chr4 C7
1424783_a_at	1433.19	1467.41	2183.32	763.142	772.577	1352.21	-0.00593939	0.0525413	0.693441	1.61714	-0.89438	-0.873466	0.0198803	1.01388	3	NM_013701 /// NM_145079 /// NM_201410 /// NM_201641 /// NM_201642 /// NM_201643 /// NM_201644 /// NM_201645	Ugt1a1 /// Ugt1a10 /// Ugt1a2 /// Ugt1a5 /// Ugt1a6a /// Ugt1a6b /// Ugt1a7c /// Ugt1a9	UDP glucuronosyltransferase 1 family, polypeptide A1 /// UDP glycosyltransferase 1 family, polypeptide A10 /// UDP glucuronosyltransferase 1 family, polypeptide A2 /// UDP glucuronosyltransferase 1 family, polypeptide A5 /// UDP glucuronosyltransferase 1 family, polypeptide A6A /// UDP glucuronosyltransferase 1 family, polypeptide A6B /// UDP glucuronosyltransferase 1 family, polypeptide A7C /// …	22236 /// 394430 /// 394432 /// 394433 /// 394434 /// 394435 /// 394436 /// 94284	chr1 D /// chr1 D|1 51.7 cM	0007584 // response to nutrient // inferred from electronic annotation /// 0008152 // metabolic process // inferred from electronic annotation /// 0018879 // biphenyl metabolic process // inferred from electronic annotation /// 0019585 // glucuronate metabolic process // inferred from direct assay /// 0019585 // glucuronate metabolic process // not recorded /// 0042493 // response to drug // infe…	Irinotecan_pathway_PharmGKB // GenMAPP
1453113_at	371.59	375.661	300.717	400.671	426.222	301.206	-3.9556e-05	0.0352683	-0.218278	0.859591	0.133962	0.218327	-0.199623	0.870778	3	NM_001159636 /// NM_028118	Wdsub1	WD repeat, SAM and U-box domain containing 1	72137	chr2 C3	0016567 // protein ubiquitination // inferred from electronic annotation
1427877_at	1272.44	979.996	1611.21	768.643	913.779	870.013	-0.000746169	-0.376029	0.424885	1.34247	-0.703869	-0.459813	-0.446645	0.733747	3	NM_026934	Zc3h15	zinc finger CCCH-type containing 15	69082	chr2 E1	0019221 // cytokine-mediated signaling pathway // inferred from direct assay
1433924_at	308.703	178.975	81.701	204.346	136.664	58.1311	-0.00308516	-0.773661	-1.8469	0.277988	-0.569882	-1.15456	-2.31023	0.201628	3
1442613_at	1411.04	1294.88	249.664	1573.6	1512.9	429.033	-5.70727e-05	-0.107143	-2.41345	0.187707	0.182292	0.120971	-1.62047	0.325228	3

## Sheet: KO Fold Change
#Clustering Algorithm: K-Means
#Clustered On: Entities
#Similarity Measure: Euclidean
#Number of Clusters: 4
#Maximum number of iterations: 50
#)
# Technology : Affymetrix.GeneChip.Mouse430_2
# Owner : gxuser
# Created On : Fri Jun 18 15:43:40 EDT 2010										vs WT Sal				vs WT Sal
GeneName	[Nrf2, Saline](raw)	[Nrf2, U-NT](raw)	[Nrf2, U-T](raw)	[Nrf2-KO, Saline](raw)	[Nrf2-KO, U-NT](raw)	[Nrf2-KO, U-T](raw)	[Nrf2, Saline](normalized)	[Nrf2, U-NT](normalized)	[Nrf2, U-T](normalized)	Fold Change in WT tumor	[Nrf2-KO, Saline](normalized)	[Nrf2-KO, U-NT](normalized)	[Nrf2-KO, U-T](normalized)	Fold Change in KO tumor	Cluster (Fig. 7-C)	RefSeq Transcript ID	Gene Symbol	Gene Title	Entrez Gene	Chromosomal Location	Gene Ontology Biological Process	Pathway	QTL
1458719_at	27.7119	32.2602	38.1845	228.317	246.014	292.165	-0.0451412	0.230738	0.541473	1.45546	3.0624	3.15413	3.49791	11.2973	1
1428781_at	948.044	1213.25	12941.9	570.413	767.415	9197.33	-0.0163497	0.364872	3.85725	14.4927	-0.731349	-0.284999	3.38282	10.4311	3	NM_028618 /// NM_172899	Dmkn	dermokine	73712	chr7 A3	0030154 // cell differentiation // inferred from electronic annotation
1421137_a_at	55.3448	62.0241	327.346	60.3802	79.7438	484.469	-0.00894684	0.0853577	2.64915	6.27296	0.147067	0.524673	3.22963	9.38027	0	NM_001039050 /// NM_001039051 /// NM_001039052 /// NM_001039053 /// NM_008863	Pkib	protein kinase inhibitor beta, cAMP dependent, testis specific	18768	chr10 B4|10 30.0 cM	0006469 // negative regulation of protein kinase activity // inferred from electronic annotation	Calcium_regulation_in_cardiac_cells // GenMAPP /// Smooth_muscle_contraction // GenMAPP
1456539_at	243.56	237.294	2827.16	173.684	222.483	1650.11	-0.0201482	-0.0199546	3.62218	12.3136	-0.466046	-0.109482	2.85541	7.23708	0
1448111_at	118.459	107.661	151.902	732.856	727.359	766.484	-0.00177869	-0.133392	0.434567	1.35151	2.6536	2.62727	2.79671	6.94853	0	NM_018737	Ctps2	cytidine 5'-triphosphate synthase 2	55936	chrX F5	0006221 // pyrimidine nucleotide biosynthetic process // inferred from electronic annotation /// 0006541 // glutamine metabolic process // inferred from electronic annotation
1445860_at	111.821	117.234	879.689	92.2195	97.6541	689.559	-0.0137048	0.0685936	3.06227	8.35288	-0.272995	-0.19715	2.72708	6.62112	1	NM_026743	Tspan11	tetraspanin 11	68498	chr6 F3
1449088_at	623.98	984.386	5274.59	582.653	904.768	3783.4	-0.00336802	0.673742	3.16401	8.96318	-0.0832789	0.549874	2.70249	6.50925	0	NM_007994	Fbp2	fructose bisphosphatase 2	14120	chr13 B3	0005975 // carbohydrate metabolic process // inferred from electronic annotation /// 0006094 // gluconeogenesis // inferred from electronic annotation	Glycolysis_and_Gluconeogenesis // GenMAPP
1415698_at	827.311	980.99	6727.63	789.109	959.759	4820.78	-0.0024226	0.263645	3.10938	8.63011	-0.0425067	0.234792	2.64315	6.24694	0	NM_001035122 /// NM_027307	Golm1	golgi membrane protein 1	105348	chr13 B3
1448766_at	40.0219	45.3315	543.64	26.9576	33.6246	229.848	-0.030259	0.195337	3.8496	14.416	-0.545418	-0.232166	2.61964	6.14596	0	NM_008124	Gjb1	gap junction protein, beta 1	14618	chrX D-F4|X 41.0 cM	0007154 // cell communication // inferred from electronic annotation	Calcium_regulation_in_cardiac_cells // GenMAPP
1448767_s_at	121.847	192.873	1490.23	87.6756	105.115	679.55	-0.0138313	0.65392	3.69543	12.9549	-0.470574	-0.191984	2.58372	5.99482	0	NM_008124	Gjb1	gap junction protein, beta 1	14618	chrX D-F4|X 41.0 cM	0007154 // cell communication // inferred from electronic annotation	Calcium_regulation_in_cardiac_cells // GenMAPP
1427963_s_at	26.849	21.4556	330.058	24.739	29.0851	135.142	-0.0124771	-0.304235	3.7013	13.0078	-0.096777	0.136823	2.41518	5.33386	0	NM_153133	Rdh9	retinol dehydrogenase 9	103142	chr10 D3	0001523 // retinoid metabolic process // inferred from direct assay /// 0008152 // metabolic process // inferred from electronic annotation /// 0008202 // steroid metabolic process // inferred from direct assay /// 0042904 // 9-cis-retinoic acid biosynthetic process // inferred from direct assay /// 0055114 // oxidation reduction // inferred from electronic annotation
1453480_at	116.775	146.125	895.865	116.105	119.55	539.555	-0.0282547	0.336249	3.02191	8.1224	0.015574	0.0555293	2.31091	4.96195	1	XM_885435 /// XM_914650	Tmem213	transmembrane protein 213	77522	chr6 B1
1425179_at	106.303	122.066	792.871	98.9827	111.5	471.468	-0.0111362	0.218268	2.98422	7.91298	-0.080332	0.0888489	2.2525	4.76509	2	NM_009171	Shmt1	serine hydroxymethyltransferase 1 (soluble)	20425	chr11 B2	0006544 // glycine metabolic process // inferred from electronic annotation /// 0006563 // L-serine metabolic process // inferred from electronic annotation /// 0006730 // one-carbon compound metabolic process // inferred from electronic annotation
1448470_at	233.575	322.815	1795.13	179.991	281.334	1034.4	-0.00841916	0.486601	3.02709	8.15162	-0.354075	0.288761	2.25051	4.75851	0	NM_019395	Fbp1	fructose bisphosphatase 1	14121	chr13 B3-C1	0005975 // carbohydrate metabolic process // inferred from electronic annotation /// 0006094 // gluconeogenesis // inferred from electronic annotation	Glycolysis_and_Gluconeogenesis // GenMAPP
1417895_a_at	45.5178	61.0034	414.59	40.9037	48.0879	196.395	-0.0180598	0.416607	3.26899	9.63972	-0.131858	0.0978042	2.21066	4.62887	3	NM_025452	Tmem54	transmembrane protein 54	66260	chr4 D2.2
1449555_a_at	69.7528	67.3838	778.189	46.0541	58.369	282.146	-0.00135276	-0.0321427	3.56435	11.8298	-0.579511	-0.242375	2.10124	4.29078	0	NM_001083904 /// NM_001083905 /// NM_021564	Fetub	fetuin beta	59083	chr16 B|16 14.1 cM
1455726_at	278.374	324.319	1578.89	263.111	305.195	1107.33	-2.61778e-05	0.238156	2.58997	6.02086	-0.0596042	0.147014	2.09172	4.26256	0	NM_001033236	Gm71	gene model 71, (NCBI)	207965	chr12 C2
1423596_at	348.045	456.878	1562.93	333.196	436.02	1270.39	-0.00166416	0.410153	2.2541	4.77037	-0.0451047	0.345411	1.97132	3.92125	2	NM_001159631 /// NM_021606	Nek6	NIMA (never in mitosis gene a)-related expressed kinase 6	59126	chr2 B|2 28.0 cM	0006468 // protein amino acid phosphorylation // inferred from electronic annotation /// 0006468 // protein amino acid phosphorylation // inferred from sequence or structural similarity /// 0006915 // apoptosis // inferred from electronic annotation /// 0007049 // cell cycle // inferred from electronic annotation /// 0007059 // chromosome segregation // inferred from electronic annotation /// 000…
1424730_a_at	155.051	162.832	740.832	124.538	150.645	533.403	-0.0038029	0.0850797	2.34175	5.06917	-0.32351	-0.0222636	1.88501	3.69354	2	NM_001145899 /// NM_021301	Slc15a2	solute carrier family 15 (H+/peptide transporter), member 2	57738	chr16 B3	0006810 // transport // inferred from electronic annotation /// 0006857 // oligopeptide transport // inferred from direct assay /// 0006857 // oligopeptide transport // inferred from electronic annotation /// 0015031 // protein transport // inferred from electronic annotation
1451064_a_at	159.901	185.558	789.067	158.706	212.902	550.1	-0.00368818	0.22933	2.38885	5.23741	-0.000783538	0.431754	1.88409	3.69119	0	NM_177420	Psat1	phosphoserine aminotransferase 1	107272	chr19 A|19 32.5 cM	0006564 // L-serine biosynthetic process // inferred from electronic annotation /// 0008152 // metabolic process // inferred from electronic annotation /// 0008652 // amino acid biosynthetic process // inferred from electronic annotation
1426570_a_at	60.1101	52.921	282.62	45.8827	69.3046	196.458	-0.00123569	-0.297253	2.31856	4.98834	-0.374324	0.211064	1.81031	3.50717	3	NM_001159544 /// NM_010237	Frk	fyn-related kinase	14302	chr10 B1	0006468 // protein amino acid phosphorylation // inferred from electronic annotation
1450727_a_at	296.538	551.121	1122.17	528.368	561.131	960.427	-0.0173798	0.914566	2.00827	4.023	0.857054	0.939482	1.79997	3.48214	3	NM_026389	Poldip2	polymerase (DNA-directed), delta interacting protein 2	67811	chr11 B5
1433485_x_at	520.268	592.514	2139.85	460.166	508.15	1638.52	-0.0015379	0.189782	2.12662	4.36692	-0.156712	-0.0129633	1.75572	3.37695	3	NM_018882	Gpr56	G protein-coupled receptor 56	14766	chr8 D1|8 45.0 cM	0007165 // signal transduction // inferred from electronic annotation /// 0007166 // cell surface receptor linked signal transduction // inferred from electronic annotation /// 0007186 // G-protein coupled receptor protein signaling pathway // inferred from electronic annotation /// 0007218 // neuropeptide signaling pathway // inferred from electronic annotation	GPCRDB_Other // GenMAPP
1418449_at	154.012	145.635	736.148	111.232	127.605	478.647	-0.0118554	-0.0889261	2.34312	5.07399	-0.455366	-0.252426	1.74069	3.34195	0	NM_133664	Lad1	ladinin	16763	chr1 E4
1420683_at	96.7382	92.1588	480.783	73.7559	85.2084	300.25	-0.0191116	-0.0553878	2.39944	5.276	-0.366897	-0.165765	1.73118	3.31998	2	NM_134253	Bnipl	BCL2/adenovirus E1B 19kD interacting protein like	171388	chr3 F2.1	0006915 // apoptosis // inferred from electronic annotation /// 0006917 // induction of apoptosis // not recorded
1426323_x_at	481.649	564.57	1180.34	549.282	618.877	1489.62	-0.00106883	0.246602	1.37949	2.60176	0.211424	0.381508	1.73076	3.31902	0	NM_013929	Siva1	SIVA1, apoptosis-inducing factor	30954	chr12 F2	0006915 // apoptosis // inferred from electronic annotation /// 0043065 // positive regulation of apoptosis // inferred from electronic annotation
1424109_a_at	1197.1	1214.05	2052.26	2485.3	2573.27	3643.27	-0.00189981	0.0384427	0.86382	1.81985	1.07502	1.12337	1.7074	3.26572	2	NM_001113560 /// NM_025374	Glo1	glyoxalase 1	109801	chr17 A3.3|17 16.0 cM	0006916 // anti-apoptosis // inferred from electronic annotation /// 0006916 // anti-apoptosis // inferred from sequence or structural similarity
1416698_a_at	738.985	847.398	3136.09	649.845	812.018	2157.5	-0.0131502	0.199278	2.16813	4.4944	-0.164774	0.154546	1.64703	3.13188	0	NM_016904	Cks1b	CDC28 protein kinase 1b	54124	chr3 F1	0007049 // cell cycle // inferred from electronic annotation /// 0051301 // cell division // inferred from electronic annotation
1419358_at	319.29	417.195	1222.24	334.765	418.668	928.861	-0.00322948	0.405296	2.02313	4.06465	0.0936569	0.410653	1.64307	3.1233	0	NM_030889	Sorcs2	sortilin-related VPS10 domain containing receptor 2	81840	chr5 B3
1418123_at	566.084	723.917	2207.81	532.719	707.753	1619.29	-0.000110141	0.372204	2.04955	4.13977	-0.0698866	0.338058	1.61966	3.07303	0	NM_011676	Unc119	unc-119 homolog (C. elegans)	22248	chr11 B5|11 44.99 cM	0007601 // visual perception // inferred from electronic annotation /// 0050896 // response to stimulus // inferred from electronic annotation
1415922_s_at	278.251	274.27	1274.42	257.482	320.54	763.063	-0.000282522	-0.0477257	2.28124	4.86095	-0.0952975	0.222215	1.54765	2.9234	0	NM_010807	Marcksl1	MARCKS-like 1	17357	chr4 D2.2|4 59.0 cM	0008284 // positive regulation of cell proliferation // inferred from direct assay
1439878_at	24.6503	29.0314	234.557	26.1317	25.1436	66.8839	-0.000200461	0.251344	3.33494	10.0906	0.0994624	0.048792	1.54211	2.91221	0	NM_008412	Ivl	involucrin	16447	chr3 F1|3 45.2 cM	0030216 // keratinocyte differentiation // inferred from electronic annotation /// 0031424 // keratinization // inferred from electronic annotation
1419192_at	156.196	150.806	1020.49	123.762	132.201	423.987	-0.0271885	-0.0583653	2.79357	6.93342	-0.312491	-0.230063	1.5301	2.88806	0	NM_010215	Il4i1	interleukin 4 induced 1	14204	chr7 B4|7 23.1 cM	0009072 // aromatic amino acid family metabolic process // inferred from direct assay /// 0032313 // regulation of Rab GTPase activity // inferred from electronic annotation /// 0055114 // oxidation reduction // inferred from electronic annotation
1420719_at	146.562	206.673	260.67	231.33	333.483	393.209	-0.021355	0.458625	0.915691	1.88647	0.681058	1.19835	1.52528	2.87843	0	NM_031374	Tex15	testis expressed gene 15	104271	chr8 A4	0007129 // synapsis // inferred from mutant phenotype /// 0007130 // synaptonemal complex assembly // inferred from mutant phenotype /// 0007140 // male meiosis // inferred from mutant phenotype /// 0007283 // spermatogenesis // inferred from mutant phenotype /// 0009566 // fertilization // inferred from mutant phenotype /// 0010569 // regulation of double-strand break repair via homologous recom…
1451210_at	528.775	599.168	2094.26	491.286	558.797	1390.48	-0.00226718	0.199639	2.07289	4.20729	-0.0810804	0.0998482	1.49815	2.82481	0	NM_015817	Ppap2c	phosphatidic acid phosphatase type 2C	50784	chr10 C1|10 42.0 cM
1460466_at	366.549	350.354	485.72	743.875	774.944	959.661	-0.00114212	-0.0689178	0.492329	1.40671	1.04292	1.09966	1.49095	2.81075	0	NM_028527	1700047I17Rik1	RIKEN cDNA 1700047I17 gene 1	73385	chr12 C1
1421224_a_at	140.467	109.351	504.933	127.117	129.801	366.484	-0.0016886	-0.346311	1.93101	3.81323	-0.119296	-0.0935409	1.48337	2.79601	3	NM_009330	Hnf1b	HNF1 homeobox B	21410	chr11 C|11 44.0 cM	0001822 // kidney development // inferred from sequence or structural similarity /// 0001822 // kidney development // inferred from electronic annotation /// 0001826 // inner cell mass cell differentiation // inferred from mutant phenotype /// 0006350 // transcription // inferred from electronic annotation /// 0006355 // regulation of transcription, DNA-dependent // inferred from electronic annot…
1425900_at	230.023	252.518	875.17	233.984	256.095	599.003	-0.00278278	0.148776	2.01493	4.04161	0.0485978	0.175629	1.47653	2.78279	3	NM_145419	Hkdc1	hexokinase domain containing 1	216019	chr10 B4	0005975 // carbohydrate metabolic process // inferred from electronic annotation /// 0006096 // glycolysis // inferred from electronic annotation
1448441_at	156.546	175.234	693.892	137.07	166.761	405.24	-0.00668716	0.179535	2.23217	4.69839	-0.172059	0.109048	1.46953	2.76932	0	NM_016904	Cks1b	CDC28 protein kinase 1b	54124	chr3 F1	0007049 // cell cycle // inferred from electronic annotation /// 0051301 // cell division // inferred from electronic annotation
1443664_s_at	47.6229	51.5473	217.028	46.1155	49.5017	120.819	-0.0063273	0.132645	2.27403	4.83673	-0.0302743	0.075391	1.44039	2.71394	3	NM_027152	Cd164l2	CD164 sialomucin-like 2	69655	chr4 D3
1417268_at	1066.22	816.622	4239.48	464.496	620.399	2672.27	-0.00968694	-0.388068	2.07393	4.21031	-1.17272	-0.760576	1.42322	2.68183	3	NM_009841	Cd14	CD14 antigen	12475	chr18 B2|18 31.0 cM	0002237 // response to molecule of bacterial origin // inferred from direct assay /// 0006954 // inflammatory response // inferred from electronic annotation /// 0006955 // immune response // inferred from electronic annotation
1424108_at	638.182	638.615	882.538	1417.45	1383.26	1543.88	-0.00133987	0.0207357	0.555001	1.46917	1.17473	1.13703	1.37838	2.59976	0	NM_001113560 /// NM_025374	Glo1	glyoxalase 1	109801	chr17 A3.3|17 16.0 cM	0006916 // anti-apoptosis // inferred from electronic annotation /// 0006916 // anti-apoptosis // inferred from sequence or structural similarity
1417458_s_at	243.19	280.023	1021.64	200.167	287.34	583.64	-0.00406296	0.218563	2.15352	4.44913	-0.260901	0.260649	1.3641	2.57416	0	NM_025415	Cks2	CDC28 protein kinase regulatory subunit 2	66197	chr13 A5	0007049 // cell cycle // inferred from electronic annotation /// 0007127 // meiosis I // inferred from mutant phenotype /// 0051301 // cell division // inferred from electronic annotation
1440815_x_at	14.5736	14.6515	16.3403	19.7166	18.1844	33.5289	-0.0092719	0.0273266	0.2526	1.19135	0.451086	0.321925	1.30551	2.47171	0	XM_904187 /// XR_033489	EG666481 /// LOC624112	predicted gene, EG666481 /// hypothetical protein LOC624112	624112 /// 666481	chr14 B /// chr14 C1
1418076_at	548.265	628.282	1696.02	471.803	592.568	1248.89	-0.00974901	0.214104	1.7162	3.28571	-0.195583	0.126706	1.29122	2.44735	2	NM_011176	St14	suppression of tumorigenicity 14 (colon carcinoma)	19143	chr9 A4|9 17.0 cM	0006508 // proteolysis // inferred from electronic annotation /// 0016477 // cell migration // traceable author statement
1438183_x_at	113.791	90.2441	121.759	205.372	173.585	252.642	-0.00931406	-0.435525	0.171227	1.12602	0.874738	0.619192	1.24834	2.37568	3	NM_146126	Sord	sorbitol dehydrogenase	20322	chr2 E5|2 66.0 cM	0006060 // sorbitol metabolic process // inferred from direct assay /// 0006062 // sorbitol catabolic process // inferred from electronic annotation /// 0008152 // metabolic process // inferred from electronic annotation /// 0046370 // fructose biosynthetic process // inferred from electronic annotation /// 0051160 // L-xylitol catabolic process // inferred from electronic annotation /// 0055114 …
1417420_at	3011.25	3054.3	4560.91	2920.94	3886.1	6643.1	-0.0106724	0.0368988	0.685027	1.60773	-0.0210004	0.384749	1.24363	2.36793	2	NM_007631	Ccnd1	cyclin D1	12443	chr7 F5|7 72.3 cM	0000320 // re-entry into mitotic cell cycle // inferred from direct assay /// 0001934 // positive regulation of protein amino acid phosphorylation // inferred from electronic annotation /// 0006468 // protein amino acid phosphorylation // inferred from direct assay /// 0007049 // cell cycle // inferred from direct assay /// 0007049 // cell cycle // inferred from electronic annotation /// 0010039 …	G1_to_S_cell_cycle_Reactome // GenMAPP /// Wnt_Signaling // GenMAPP
1418318_at	403.52	353.168	2023.69	254.635	293.08	870.191	-0.0213608	-0.182473	2.41062	5.31703	-0.6722	-0.441634	1.20873	2.31135	2	NM_023270	Rnf128	ring finger protein 128	66889	chrX F1	0019941 // modification-dependent protein catabolic process // inferred from electronic annotation /// 0042036 // negative regulation of cytokine biosynthetic process // inferred from direct assay
1437226_x_at	499.371	519.718	1641.25	435.469	546.138	1068.75	-0.000366749	0.0688934	1.79962	3.48129	-0.177228	0.146868	1.19655	2.29191	0	NM_010807	Marcksl1	MARCKS-like 1	17357	chr4 D2.2|4 59.0 cM	0008284 // positive regulation of cell proliferation // inferred from direct assay
1454126_at	26.5719	27.5004	144.128	23.388	26.8016	56.6467	-0.000317046	0.0672001	2.51939	5.73338	-0.160397	0.0318924	1.19441	2.2885	3		0710001A04Rik	RIKEN cDNA 0710001A04 gene	68402
1423891_at	613.133	626.007	1866.65	498.323	554.761	1300.67	-0.00332402	0.0449574	1.69119	3.22924	-0.274878	-0.124029	1.18772	2.27792	0	NM_133994	Gstt3	glutathione S-transferase, theta 3	103140	chr10 C1	0006749 // glutathione metabolic process // inferred from direct assay
1435402_at	123.675	130.703	335.995	112.16	146.197	256.604	-0.0086401	0.0943143	1.52883	2.88552	-0.118501	0.261365	1.15723	2.23029	2	NM_172768	Gramd1b	GRAM domain containing 1B	235283	chr9 B
1422468_at	773.632	798.87	1011.87	833.217	952.726	1594.6	-0.0052194	0.0574564	0.471985	1.38702	0.125619	0.318942	1.14548	2.2122	3	NM_008917	Ppt1	palmitoyl-protein thioesterase 1	19063	chr4 D1-D3|4 59.1 cM	0002084 // protein depalmitoylation // inferred from mutant phenotype /// 0002084 // protein depalmitoylation // inferred from sequence or structural similarity /// 0006309 // DNA fragmentation involved in apoptosis // inferred from sequence or structural similarity /// 0006464 // protein modification process // inferred from electronic annotation /// 0006898 // receptor-mediated endocytosis // n…
1423232_at	112.877	121.859	378.814	109.208	117.573	232.264	-0.00175188	0.130572	1.83193	3.56014	-0.0229233	0.0777715	1.13959	2.20318	2	NM_008815	Etv4	ets variant gene 4 (E1A enhancer binding protein, E1AF)	18612	chr11 D|11 60.0 cM	0006350 // transcription // inferred from electronic annotation /// 0006355 // regulation of transcription, DNA-dependent // inferred from electronic annotation /// 0008045 // motor axon guidance // inferred from mutant phenotype /// 0009887 // organ morphogenesis // inferred from direct assay /// 0045941 // positive regulation of transcription // inferred from direct assay /// 0045941 // positiv…
1425615_a_at	597.68	611.572	1897.33	570.096	619.141	1223.19	-0.00126749	0.0494671	1.75038	3.36446	-0.0456769	0.0710908	1.13478	2.19585	3	NM_028994	Pck2	phosphoenolpyruvate carboxykinase 2 (mitochondrial)	74551	chr14 C1|14 21.0 cM	0006094 // gluconeogenesis // inferred from electronic annotation
1425102_a_at	366.579	290.385	1468.19	316.972	374.338	747.895	-0.00821167	-0.360709	2.0787	4.22425	-0.188753	0.0487203	1.12938	2.18765	3	NM_001130513 /// NM_027286	Ace2	angiotensin I converting enzyme (peptidyl-dipeptidase A) 2	70008	chrX F5|X 70.5 cM	0003051 // angiotensin-mediated drinking behavior // inferred from electronic annotation /// 0003081 // regulation of systemic arterial blood pressure by renin-angiotensin // inferred from electronic annotation /// 0006508 // proteolysis // inferred from electronic annotation /// 0032800 // receptor biosynthetic process // inferred from electronic annotation /// 0046813 // virion attachment, bind…
1449832_at	17.3232	17.9006	22.3235	17.444	16.6748	35.2691	-0.000176623	0.0617894	0.443205	1.35962	0.0265463	-0.0350971	1.12832	2.18604	0	XM_983279	1700091H14Rik	RIKEN cDNA 1700091H14 gene	73553	chr14 B
1431510_s_at	290.46	324.542	500.667	431.635	412.295	591.102	-0.00362448	0.157165	0.868228	1.82542	0.593317	0.524057	1.12726	2.18443	0	NM_026442	Cmc1	COX assembly mitochondrial protein homolog (S. cerevisiae)	67899	chr9 F3
1424098_at	75.5586	64.9865	302.073	62.6538	63.3569	156.823	-0.00135494	-0.228758	2.08368	4.23887	-0.251867	-0.233341	1.12488	2.18084	3	NM_029001	Elovl7	ELOVL family member 7, elongation of long chain fatty acids (yeast)	74559	chr13 D2.1	0006633 // fatty acid biosynthetic process // inferred from electronic annotation /// 0008610 // lipid biosynthetic process // inferred from electronic annotation
1450914_at	891.059	975.358	2413.75	852.255	906.938	1768.31	-0.00300862	0.148421	1.52272	2.87331	-0.0432871	0.0455314	1.09153	2.13101	0	NM_008889	Ppp1r14b	protein phosphatase 1, regulatory (inhibitor) subunit 14B	18938	chr19 A	0042325 // regulation of phosphorylation // inferred from electronic annotation	mRNA_processing_binding_Reactome // GenMAPP
1416773_at	487.774	464.331	556.206	679.491	758.912	966.9	-0.0315476	-0.0931268	0.266148	1.20259	0.496457	0.653696	1.08843	2.12642	0	NM_009516	Wee1	WEE 1 homolog 1 (S. pombe)	22390	chr7 F1	0006468 // protein amino acid phosphorylation // inferred from electronic annotation /// 0007049 // cell cycle // inferred from electronic annotation /// 0007067 // mitosis // inferred from electronic annotation /// 0051301 // cell division // inferred from electronic annotation	Cell_Cycle_KEGG // GenMAPP /// G1_to_S_cell_cycle_Reactome // GenMAPP
1425151_a_at	208.738	222.546	950.986	155.623	184.458	412.546	-0.00441982	0.10344	2.26374	4.80234	-0.408621	-0.157012	1.08444	2.12056	0	NM_027988	Noxo1	NADPH oxidase organizer 1	71893	chr17 A3.3|17 10.0 cM	0006801 // superoxide metabolic process // inferred from direct assay /// 0007154 // cell communication // inferred from electronic annotation
1441971_at	128.318	91.6781	367.683	97.2013	108.812	251.84	-0.0212898	-0.493911	1.60694	3.04605	-0.3876	-0.222293	1.07545	2.10738	0
1437085_at	241.874	230.11	650.356	209.799	222.352	473.796	-0.00408629	-0.0616634	1.51422	2.85644	-0.184305	-0.100263	1.07309	2.10394	3	NM_178727	D630039A03Rik	RIKEN cDNA D630039A03 gene	242484	chr4 B3
1451160_s_at	613.228	798.985	1693.45	607.927	698.303	1201.04	-0.00315083	0.400791	1.55123	2.93068	0.0120829	0.205469	1.07035	2.09994	0	NM_027514	Pvr	poliovirus receptor	52118	chr7 A3|7 4.0 cM	0016337 // cell-cell adhesion // inferred from direct assay /// 0016477 // cell migration // inferred from direct assay
1417041_at	633.589	686.291	1486.71	592.266	607.075	1233.44	-0.000334434	0.134248	1.31735	2.49208	-0.072306	-0.0420325	1.06413	2.09091	0	NM_009085	Polr1c	polymerase (RNA) I polypeptide C	20016	chr17 C	0006350 // transcription // inferred from electronic annotation	RNA_transcription_Reactome // GenMAPP
1428851_at	430.317	517.544	293.717	2518.53	2240.68	837.138	-0.000982327	0.28006	-0.46644	0.723748	2.563	2.40066	1.06135	2.08688	3	NM_025831	1300014I06Rik	RIKEN cDNA 1300014I06 gene	66895	chr13 A4|13	0007154 // cell communication // inferred from electronic annotation
1429413_at	2909.66	2632.69	7779.42	2558.13	2459.39	5617.93	-0.00274544	-0.125194	1.50271	2.83375	-0.162051	-0.223758	1.05075	2.0716	2	NM_027468 /// XM_917914 /// XM_994613	Cpm	carboxypeptidase M	70574	chr10 D2	0006508 // proteolysis // inferred from electronic annotation
1448791_at	1198.74	1203.15	1539.84	1561.3	1625.93	2299.91	-0.0110646	0.0168199	0.446389	1.36263	0.403076	0.458782	1.04165	2.05858	1	NM_024225 /// XM_001480782	LOC100048642 /// Snx5	similar to Snx5 protein /// sorting nexin 5	100048642 /// 69178	chr2 H1|2 80.0 cM	0006810 // transport // inferred from electronic annotation /// 0007154 // cell communication // inferred from electronic annotation /// 0015031 // protein transport // inferred from electronic annotation
1448286_at	1019.31	1126.11	2607.24	1048.32	1058.91	1949.43	-0.00089776	0.162473	1.44175	2.71651	0.0631992	0.073204	1.03775	2.05302	0	NM_016763	Hsd17b10	hydroxysteroid (17-beta) dehydrogenase 10	15108	chrX F3	0008033 // tRNA processing // inferred from electronic annotation /// 0008152 // metabolic process // inferred from electronic annotation /// 0055114 // oxidation reduction // inferred from electronic annotation
1423869_s_at	396.389	407.114	646.661	489.076	476.33	746.043	-0.000515256	0.0553188	0.791039	1.73032	0.328035	0.284788	1.0156	2.02175	1	NM_153162	Txnrd3	thioredoxin reductase 3	232223	chr6 D1	0006749 // glutathione metabolic process // inferred from direct assay /// 0006810 // transport // inferred from electronic annotation /// 0007275 // multicellular organismal development // inferred from electronic annotation /// 0007283 // spermatogenesis // inferred from electronic annotation /// 0022900 // electron transport chain // inferred from electronic annotation /// 0030154 // cell diff…
1427095_at	459.267	465.651	1100.89	411.761	498.774	856.68	-0.000715049	0.0360129	1.34821	2.54596	-0.134201	0.139871	1.00294	2.00409	2	NM_133974	Cdcp1	CUB domain containing protein 1	109332	chr9 F4
1423903_at	411.693	435.908	1094.68	403.827	429.915	767.899	-0.00249905	0.0916762	1.49579	2.82019	-0.0029513	0.0825107	0.998901	1.99848	0	NM_027514	Pvr	poliovirus receptor	52118	chr7 A3|7 4.0 cM	0016337 // cell-cell adhesion // inferred from direct assay /// 0016477 // cell migration // inferred from direct assay
1452226_at	246.861	252.358	608.802	240.886	250.074	457.328	-0.00135379	0.0366005	1.38869	2.61841	-0.0125852	0.036536	0.988815	1.98455	3	NM_173867 /// XM_001477942	LOC100047340 /// Rcc2	hypothetical protein LOC100047340 /// regulator of chromosome condensation 2	100047340 /// 108911	chr4 D3	0007049 // cell cycle // inferred from electronic annotation /// 0007067 // mitosis // inferred from electronic annotation /// 0051301 // cell division // inferred from electronic annotation
1443870_at	317.362	310.349	739.132	262.772	286.449	582.18	-0.000310156	-0.0198038	1.30363	2.46849	-0.247594	-0.130375	0.977917	1.96962	2	NM_001033336	Abcc4	ATP-binding cassette, sub-family C (CFTR/MRP), member 4	239273	chr14 E4	0006810 // transport // inferred from electronic annotation /// 0006811 // ion transport // inferred from electronic annotation /// 0006855 // multidrug transport // traceable author statement
1448465_at	316.959	374.91	874.065	299.929	336.652	574.102	-0.000839298	0.255804	1.54883	2.9258	-0.0570609	0.104438	0.959573	1.94473	2	NM_008698	Nipsnap1	4-nitrophenylphosphatase domain and non-neuronal SNAP25-like protein homolog 1 (C. elegans)	18082	chr11 A1
1439117_at	165.267	162.667	449.984	148.404	125.345	299.343	-0.00619601	-0.00212971	1.53154	2.89093	-0.135098	-0.379413	0.955184	1.93883	0	NM_001040682 /// NM_053155	Clmn	calmin	94040	chr12 F1
1416167_at	1278.3	1385.17	3315.13	1285.99	1349.75	2310.29	-0.000682053	0.133643	1.4614	2.75375	0.0326891	0.0989157	0.953533	1.93661	2	NM_016764	Prdx4	peroxiredoxin 4	53381	chrX F3|X 67.7 cM	0045454 // cell redox homeostasis // inferred from electronic annotation /// 0055114 // oxidation reduction // inferred from electronic annotation
1452266_at	621.182	608.639	1852.4	624.168	591.547	1111.47	-0.00312216	-0.00938339	1.65828	3.15641	0.0308948	-0.0499197	0.941411	1.92041	0	NM_152822	Las1l	LAS1-like (S. cerevisiae)	76130	chrX C3
1424048_a_at	734.546	811.939	1725.1	754.971	789.547	1309.5	-0.000253857	0.164408	1.31885	2.49468	0.0599049	0.123291	0.936082	1.91332	0	NM_028057	Cyb5r1	cytochrome b5 reductase 1	72017	chr1 E4	0006694 // steroid biosynthetic process // inferred from electronic annotation /// 0008610 // lipid biosynthetic process // inferred from electronic annotation /// 0016126 // sterol biosynthetic process // inferred from electronic annotation /// 0055114 // oxidation reduction // inferred from electronic annotation
1452620_at	87.3667	82.6541	251.69	82.2454	88.1462	155.746	-0.000321072	-0.110699	1.61287	3.05859	-0.0648692	0.0322114	0.934078	1.91067	2	NM_028994	Pck2	phosphoenolpyruvate carboxykinase 2 (mitochondrial)	74551	chr14 C1|14 21.0 cM	0006094 // gluconeogenesis // inferred from electronic annotation
1424432_at	307.773	347.96	327.282	464.3	545.484	544.458	-0.00184619	0.182116	0.156297	1.11442	0.613105	0.845607	0.921903	1.89461	2	NM_145500	Ubtd1	ubiquitin domain containing 1	226122	chr19 C3	0006464 // protein modification process // inferred from electronic annotation
1450131_a_at	363.673	365.562	1089.63	282.218	321.805	636.5	-0.00208385	0.022444	1.66571	3.1727	-0.34264	-0.156225	0.909723	1.87869	3	NM_138653	Bspry	B-box and SPRY domain containing	192120	chr4 C1	0006810 // transport // inferred from electronic annotation /// 0006811 // ion transport // inferred from electronic annotation /// 0006816 // calcium ion transport // inferred from electronic annotation
1436513_at	328.393	288.473	919.432	282.964	305.465	574.241	-0.00297152	-0.176929	1.57291	2.97504	-0.193388	-0.092629	0.89896	1.86472	0	NM_181071	Tanc2	tetratricopeptide repeat, ankyrin repeat and coiled-coil containing 2	77097	chr11 E1
1449027_at	291.264	249.161	778.936	189.523	174.841	498.109	-0.00459748	-0.206117	1.50034	2.8291	-0.603992	-0.723019	0.876872	1.83639	0	NM_133955	Rhou	ras homolog gene family, member U	69581	chr8 E2	0000082 // G1/S transition of mitotic cell cycle // inferred from direct assay /// 0007264 // small GTPase mediated signal transduction // inferred from electronic annotation /// 0008360 // regulation of cell shape // inferred from direct assay /// 0016601 // Rac protein signal transduction // inferred from direct assay /// 0030036 // actin cytoskeleton organization // inferred from direct assay
1449184_at	608.395	447.71	2191.4	255.316	326.258	1035.48	-0.173749	-0.511659	1.93743	3.83022	-1.2253	-0.882165	0.873739	1.83241	0	NM_009402	Pglyrp1	peptidoglycan recognition protein 1	21946	chr7 A3	0006915 // apoptosis // inferred from electronic annotation /// 0006955 // immune response // inferred from electronic annotation /// 0009253 // peptidoglycan catabolic process // inferred from electronic annotation /// 0016045 // detection of bacterium // inferred from electronic annotation /// 0042742 // defense response to bacterium // inferred from electronic annotation /// 0050830 // defense…
1455884_at	755.598	825.093	2019.65	680.734	695.042	1277.79	-0.00595629	0.142892	1.50486	2.83797	-0.132922	-0.0990994	0.861636	1.8171	2	NM_172624	Dpp9	dipeptidylpeptidase 9	224897	chr17 D	0006508 // proteolysis // inferred from electronic annotation
1452734_at	6590.81	7241.42	12164.6	5805.1	6527.63	11086.9	-7.5149e-05	0.155616	0.971182	1.96045	-0.157895	0.0066394	0.853833	1.8073	0	NM_001083938 /// NM_026611 /// XM_001476345 /// XM_001476365 /// XM_001480967	Rnaset2a /// Rnaset2b	ribonuclease T2A /// ribonuclease T2B	100037283 /// 68195	chr17 B2		mRNA_processing_binding_Reactome // GenMAPP
1422821_s_at	239.573	256.775	535.157	229.542	253.481	397.919	-0.00411381	0.11388	1.24625	2.37224	-0.0402607	0.100712	0.835077	1.78395	0	NM_023377	Stard5	StAR-related lipid transfer (START) domain containing 5	170460	chr7 D3	0006694 // steroid biosynthetic process // inferred from electronic annotation /// 0006810 // transport // inferred from electronic annotation /// 0006869 // lipid transport // inferred from electronic annotation
1435855_x_at	197.158	200.325	463.318	166.259	200.072	327.297	-0.00600859	0.0274915	1.31917	2.49522	-0.22218	0.0425318	0.83428	1.78297	0	NM_019698 /// NM_153554	Aldh18a1	aldehyde dehydrogenase 18 family, member A1	56454	chr19 C3	0006561 // proline biosynthetic process // inferred from electronic annotation /// 0008152 // metabolic process // inferred from electronic annotation /// 0008652 // amino acid biosynthetic process // traceable author statement /// 0008652 // amino acid biosynthetic process // inferred from electronic annotation /// 0055114 // oxidation reduction // inferred from electronic annotation
1456097_a_at	100.495	110.686	128.396	129.415	130.376	165.566	-0.00106279	0.124484	0.437864	1.3546	0.386033	0.389647	0.82283	1.76887	1	NM_026348	Itgb3bp	integrin beta 3 binding protein (beta3-endonexin)	67733	chr4 C6	0006350 // transcription // inferred from electronic annotation /// 0006355 // regulation of transcription, DNA-dependent // inferred from electronic annotation /// 0006915 // apoptosis // inferred from electronic annotation /// 0007229 // integrin-mediated signaling pathway // inferred from electronic annotation
1425584_x_at	117.915	129.374	128.252	169.477	171.641	193.953	-0.00534177	0.14512	0.194822	1.14458	0.53938	0.560165	0.820035	1.76545	2
1437602_at	16.2414	21.1961	20.6789	16.3465	20.0319	26.4557	-0.000228349	0.384995	0.434762	1.35169	0.0307549	0.321996	0.806689	1.74919	0	NM_001013783 /// XM_001471494	Fam71b	family with sequence similarity 71, member B	432552	chr11 B1.1|11
1451346_at	244.565	255.643	523.913	256.175	271.705	397.819	-0.00130776	0.0761502	1.18548	2.27438	0.0922877	0.171036	0.804318	1.74632	0	NM_024433	Mtap	methylthioadenosine phosphorylase	66902	chr4 C4	0009116 // nucleoside metabolic process // inferred from electronic annotation
1418857_at	91.643	80.8024	438.642	61.0557	67.6971	149.424	-0.128818	-0.162383	2.34021	5.06378	-0.57575	-0.412443	0.802676	1.74433	1	NM_022411	Slc13a2	solute carrier family 13 (sodium-dependent dicarboxylate transporter), member 2	20500	chr11 B5|11 45.03 cM	0006810 // transport // inferred from electronic annotation /// 0006811 // ion transport // inferred from electronic annotation /// 0006814 // sodium ion transport // inferred from electronic annotation
1455454_at	31.5787	35.2429	77.3904	30.0628	30.9248	50.7112	-8.7219e-05	0.145662	1.37944	2.60167	-0.0492728	-0.0122222	0.780171	1.71733	2	NM_001013785	Akr1c19	aldo-keto reductase family 1, member C19	432720	chr13 A1	0055114 // oxidation reduction // inferred from electronic annotation
1423326_at	423.134	434.322	748.414	331.053	401.295	675.097	-0.0045819	0.04441	0.90871	1.87737	-0.330034	-0.0593188	0.77658	1.71307	0	NM_009848	Entpd1	ectonucleoside triphosphate diphosphohydrolase 1	12495	chr19 C3|19 35.5 cM	0006200 // ATP catabolic process // inferred from direct assay /// 0007186 // G-protein coupled receptor protein signaling pathway // inferred from direct assay /// 0009181 // purine ribonucleoside diphosphate catabolic process // inferred from direct assay /// 0030168 // platelet activation // inferred from direct assay
1416153_at	1312.7	1314.41	1635.94	1896.51	1862.75	2069.53	-0.00115078	0.0176965	0.404082	1.32325	0.555383	0.52369	0.759162	1.69251	0	NM_001100109 /// NM_001100110 /// NM_011899 /// XM_001479059 /// XM_976391	Srp54a /// Srp54b /// Srp54c	signal recognition particle 54a /// signal recognition particle 54b /// signal recognition particle 54C	100101806 /// 24067 /// 665155	chr12 C1	0006614 // SRP-dependent cotranslational protein targeting to membrane // not recorded /// 0006614 // SRP-dependent cotranslational protein targeting to membrane // inferred from electronic annotation	mRNA_processing_binding_Reactome // GenMAPP
1416761_at	103.404	137.906	344.574	104.926	128.442	163.638	-0.00325336	0.422054	1.81513	3.51892	0.0427695	0.331365	0.757318	1.69034	2	NM_008289	Hsd11b2	hydroxysteroid 11-beta dehydrogenase 2	15484	chr8 D3|8 50.8 cM	0002017 // regulation of blood volume by renal aldosterone // inferred from electronic annotation /// 0008152 // metabolic process // inferred from electronic annotation /// 0008211 // glucocorticoid metabolic process // inferred from electronic annotation /// 0055114 // oxidation reduction // inferred from electronic annotation	Glucocorticoid_Mineralocorticoid_Metabolism // GenMAPP /// Prostaglandin_synthesis_regulation // GenMAPP
1447068_at	27.5917	38.5467	27.596	28.5543	27.0044	43.1146	-0.0108322	0.401049	0.0856024	1.06113	0.0753396	-0.0112194	0.747931	1.67938	0
1429444_at	416.572	464.702	1296.88	220.628	231.638	640.973	-0.0350346	0.175586	1.72468	3.30506	-0.906177	-0.827557	0.711206	1.63717	0	NM_026864	Rasl11a	RAS-like, family 11, member A	68895	chr5 G3	0007264 // small GTPase mediated signal transduction // inferred from electronic annotation
1441371_at	162.553	179.311	336.705	166.649	181.706	243.211	-5.44724e-05	0.156088	1.13606	2.1978	0.0580389	0.180551	0.683575	1.60611	0	NM_175750	Plxna4	plexin A4	243743	chr6 B1	0007165 // signal transduction // inferred from genetic interaction /// 0007165 // signal transduction // inferred from electronic annotation /// 0007275 // multicellular organismal development // inferred from electronic annotation /// 0007399 // nervous system development // inferred from genetic interaction
1441573_at	22.1813	19.9149	21.6709	53.7395	50.713	33.2568	-0.00987093	-0.135934	0.0422838	1.02974	1.29355	1.20215	0.676792	1.59858	2	NM_001159630 /// NM_013883	Scmh1	Sex comb on midleg homolog 1 (Scmh1), mRNA	29871	chr4 D1-D2|4 56.5 cM	0006350 // transcription // inferred from electronic annotation /// 0006355 // regulation of transcription, DNA-dependent // inferred from electronic annotation /// 0007275 // multicellular organismal development // inferred from electronic annotation /// 0016458 // gene silencing // inferred from sequence or structural similarity /// 0016481 // negative regulation of transcription // non-traceab…
1442590_at	175.538	168.689	374.266	163.867	177.111	261.182	-0.00139941	-0.0620749	1.17835	2.26317	-0.0743389	0.0306811	0.673903	1.59538	3	NM_023680 /// NM_024290	Tnfrsf22 /// Tnfrsf23	tumor necrosis factor receptor superfamily, member 22 /// tumor necrosis factor receptor superfamily, member 23	79201 /// 79202	chr7 F5|7 69.56 cM /// chr7 F5|7 69.57 cM	0042981 // regulation of apoptosis // inferred from direct assay
1428921_at	59.5824	52.5134	53.1571	122.044	101.925	88.2815	-0.0215166	-0.216194	-0.0808367	0.945509	1.05521	0.785142	0.666502	1.58722	2	NM_025479	2810021B07Rik	RIKEN cDNA 2810021B07 gene	66308	chr13 A3.1
1436389_at	1168.84	1091.35	1511.27	1344.54	1276.3	1723.02	-0.00308502	-0.0811888	0.457014	1.3727	0.226642	0.145569	0.661503	1.58173	0
1457610_at	163.313	161.362	175.599	173.052	162.333	238.498	-0.00295486	-0.00218025	0.190625	1.14126	0.105357	0.0116332	0.650466	1.56968	2
1422662_at	822.759	790.239	1028.6	1057.93	1084.34	1197.58	-0.00122669	-0.0437637	0.40846	1.32727	0.385676	0.418143	0.643093	1.56167	0	NM_018886	Lgals8	lectin, galactose binding, soluble 8	56048	chr13 A1|13 8.0 cM	0006816 // calcium ion transport // inferred from electronic annotation /// 0007154 // cell communication // inferred from electronic annotation
1448894_at	889.663	1092.67	2351.02	569.277	821.073	1289.32	-0.013681	0.316289	1.48158	2.79254	-0.619013	-0.0947536	0.639611	1.55791	1	NM_008012	Akr1b8	aldo-keto reductase family 1, member B8	14187	chr6 B1|6 13.0 cM	0055114 // oxidation reduction // inferred from electronic annotation
1425583_at	58.8979	63.2813	60.2175	74.7834	77.9321	85.3006	-0.00345072	0.123515	0.118093	1.0853	0.366604	0.425085	0.635318	1.55328	0
1434263_at	466.309	538.022	539.887	528.06	594.675	669.193	-0.00192649	0.224121	0.297448	1.22897	0.203014	0.367806	0.623739	1.54086	3	NM_028657	F630110N24Rik	RIKEN cDNA F630110N24 gene	73822	chr10 C1	0006810 // transport // inferred from electronic annotation
1416229_at	1787.25	1580.15	4085.92	1295.45	1335.32	2557.1	-0.00409805	-0.174505	1.2768	2.423	-0.450448	-0.403328	0.619567	1.53641	0	NM_019437	Rfk	riboflavin kinase	54391	chr19 B	0009231 // riboflavin biosynthetic process // inferred from electronic annotation
1424022_at	350.96	335.106	804.018	221.994	229.294	501.408	-0.000887434	-0.0489758	1.27794	2.42493	-0.636171	-0.596021	0.617742	1.53447	3	NM_027950	Osgin1	oxidative stress induced growth inhibitor 1	71839	chr8 E1
1423653_at	2735.86	3144.22	6355.18	2614.85	2992.55	3904.22	-0.00680479	0.215435	1.30094	2.46389	-0.0398535	0.150306	0.616214	1.53285	0	NM_144900	Atp1a1	ATPase, Na+/K+ transporting, alpha 1 polypeptide	11928	chr3 F3|3 48.4 cM	0002026 // regulation of the force of heart contraction // inferred from mutant phenotype /// 0006754 // ATP biosynthetic process // inferred from electronic annotation /// 0006810 // transport // inferred from electronic annotation /// 0006811 // ion transport // inferred from electronic annotation /// 0006812 // cation transport // inferred from electronic annotation /// 0006813 // potassium io…
1427398_at	71.8343	59.8301	188.484	36.4488	48.0071	102.252	-0.0469239	-0.270261	1.47015	2.77051	-0.957699	-0.560469	0.613726	1.53021	0	NM_080457	Muc4	mucin 4	140474	chr16 B3	0007155 // cell adhesion // inferred from electronic annotation /// 0007160 // cell-matrix adhesion // inferred from electronic annotation
1422467_at	1617.24	1670.33	1576.15	1701.64	1881	2267.13	-0.00243877	0.0606242	0.0490705	1.0346	0.0937377	0.235034	0.589403	1.50462	0	NM_008917	Ppt1	palmitoyl-protein thioesterase 1	19063	chr4 D1-D3|4 59.1 cM	0002084 // protein depalmitoylation // inferred from mutant phenotype /// 0002084 // protein depalmitoylation // inferred from sequence or structural similarity /// 0006309 // DNA fragmentation involved in apoptosis // inferred from sequence or structural similarity /// 0006464 // protein modification process // inferred from electronic annotation /// 0006898 // receptor-mediated endocytosis // n…
1417773_at	555.918	592.201	1066	491.962	555.016	772.777	-0.00324431	0.107584	1.0261	2.03652	-0.153642	0.0147001	0.576721	1.49146	0	NM_053179	Nans	N-acetylneuraminic acid synthase (sialic acid synthase)	94181	chr4 B2	0008152 // metabolic process // inferred from electronic annotation /// 0016051 // carbohydrate biosynthetic process // inferred from electronic annotation
1424426_at	249.076	227.091	516.562	256.274	257.772	342.813	-0.00148343	-0.117863	1.13766	2.20024	0.0622902	0.0700359	0.564152	1.47852	3	NM_024433	Mtap	methylthioadenosine phosphorylase	66902	chr4 C4	0009116 // nucleoside metabolic process // inferred from electronic annotation
1452595_at	30.8425	37.5433	77.0205	30.4535	31.348	42.2746	-0.0112875	0.289636	1.40567	2.64941	-0.018517	0.0431267	0.558479	1.47272	0	NM_172845	Adamts4	a disintegrin-like and metallopeptidase (reprolysin type) with thrombospondin type 1 motif, 4	240913	chr1 H3|1 92.3 cM	0006508 // proteolysis // inferred from direct assay /// 0006508 // proteolysis // inferred from electronic annotation
1449488_at	56.3848	95.6768	66.1627	63.0165	65.6216	77.2477	-0.00158063	0.570832	0.316965	1.24571	0.185415	0.235827	0.5576	1.47182	0	NM_011097	Pitx1	paired-like homeodomain transcription factor 1	18740	chr13 B1|13 34.0 cM	0001501 // skeletal system development // inferred from mutant phenotype /// 0006350 // transcription // inferred from electronic annotation /// 0006355 // regulation of transcription, DNA-dependent // inferred from electronic annotation /// 0007275 // multicellular organismal development // inferred from electronic annotation /// 0014707 // branchiomeric skeletal muscle development // inferred f…
1418186_at	2238.95	2448.48	4145.27	2124.04	2377.98	3038.83	-0.00182082	0.146704	0.974599	1.96509	-0.0518463	0.106491	0.542449	1.45644	0	NM_008185	Gstt1	glutathione S-transferase, theta 1	14871	chr10 B5-C1|10 40.7 cM	0006749 // glutathione metabolic process // inferred from direct assay
1449028_at	304.221	251.519	798.422	192.821	194.68	409.333	-0.000510133	-0.255927	1.47745	2.78456	-0.645024	-0.635277	0.525945	1.43988	3	NM_133955	Rhou	ras homolog gene family, member U	69581	chr8 E2	0000082 // G1/S transition of mitotic cell cycle // inferred from direct assay /// 0007264 // small GTPase mediated signal transduction // inferred from electronic annotation /// 0008360 // regulation of cell shape // inferred from direct assay /// 0016601 // Rac protein signal transduction // inferred from direct assay /// 0030036 // actin cytoskeleton organization // inferred from direct assay
1417896_at	209.053	243.99	446.416	148.187	176.792	279.954	-0.00638997	0.231341	1.18078	2.26699	-0.473848	-0.220884	0.525423	1.43936	3	NM_013769	Tjp3	tight junction protein 3	27375	chr10 C1
1441001_at	48.9895	44.7593	48.6304	161.071	76.0784	65.2081	-0.00419172	-0.141098	0.0746861	1.05313	1.72544	0.639612	0.508772	1.42284	2		AI225934	expressed sequence AI225934	98884
1434564_at	160.201	146.237	255.851	132.043	161.716	212.305	-0.000571339	-0.154841	0.76213	1.69599	-0.256053	0.0321552	0.507488	1.42157	0	NM_010093	E2f3	E2F transcription factor 3	13557	chr13 A3.3	0006350 // transcription // inferred from electronic annotation /// 0006355 // regulation of transcription, DNA-dependent // inferred from direct assay /// 0006355 // regulation of transcription, DNA-dependent // inferred from electronic annotation /// 0007049 // cell cycle // inferred from electronic annotation /// 0008284 // positive regulation of cell proliferation // inferred from direct assa…	Cell_Cycle_KEGG // GenMAPP /// G1_to_S_cell_cycle_Reactome // GenMAPP
1433788_at	27.2738	30.4395	30.394	32.5275	31.0946	35.8769	-0.00171062	0.176958	0.243508	1.18387	0.277848	0.207748	0.499054	1.41329	0	NM_172544	Nrxn3	neurexin III	18191	chr12D2|12 45.0 cM	0007268 // synaptic transmission // inferred from genetic interaction /// 0007269 // neurotransmitter secretion // inferred from genetic interaction /// 0007416 // synaptogenesis // inferred from genetic interaction
1417774_at	251.135	225.36	477.498	206.612	224.227	330.258	-0.004625	-0.149471	1.01317	2.01834	-0.26314	-0.142693	0.498205	1.41246	3	NM_053179	Nans	N-acetylneuraminic acid synthase (sialic acid synthase)	94181	chr4 B2	0008152 // metabolic process // inferred from electronic annotation /// 0016051 // carbohydrate biosynthetic process // inferred from electronic annotation
1451222_at	538.833	479.437	607.334	643.606	655.535	705.43	-0.00137132	-0.174232	0.258693	1.19639	0.278703	0.301553	0.491131	1.40555	1	NM_027453	Btf3l4	basic transcription factor 3-like 4	70533	chr4 C7
1415977_at	811.401	733.81	1518.97	654.875	708.004	1056.21	-0.00498083	-0.132012	0.991385	1.98809	-0.29009	-0.17726	0.483843	1.39846	3	NM_023627	Isyna1	myo-inositol 1-phosphate synthase A1	71780	chr8 B3.3	0006021 // inositol biosynthetic process // inferred from electronic annotation /// 0008152 // metabolic process // inferred from electronic annotation /// 0008654 // phospholipid biosynthetic process // inferred from electronic annotation
1438610_a_at	588.9	612.747	724.77	741.611	750.603	765.388	-0.000305725	0.0559154	0.384466	1.30538	0.356904	0.366005	0.480965	1.39568	3	NM_009968	Cryz	crystallin, zeta	12972	chr3 H4	0008152 // metabolic process // inferred from electronic annotation /// 0055114 // oxidation reduction // inferred from electronic annotation
1416924_at	2678.11	2554.12	2786.17	2957.79	2832.72	3460.55	-0.00162996	-0.0501707	0.14328	1.10441	0.16626	0.100485	0.47254	1.38755	0	NM_018772	Bri3	brain protein I3	55950	chr5 G2
1436797_a_at	737.529	758.279	1184.32	633.808	657.842	943.833	-0.0020962	0.0598698	0.770158	1.70546	-0.193352	-0.144231	0.458778	1.37438	2	NM_011512	Surf4	surfeit gene 4	20932	chr2 A3|2 15.5 cM
1456479_at	345.64	345.628	747.023	315.694	316.291	442.241	-0.00184834	0.0155793	1.19487	2.28925	-0.108547	-0.107191	0.457799	1.37344	0	NM_172468	Snx30	sorting nexin family member 30	209131	chr4 B3	0006810 // transport // inferred from electronic annotation /// 0007154 // cell communication // inferred from electronic annotation /// 0015031 // protein transport // inferred from electronic annotation
1430834_at	34.1402	30.6755	78.8852	28.1703	27.9929	43.6805	-0.00789902	-0.218003	1.29204	2.44873	-0.262348	-0.281131	0.446842	1.36305	2	NM_183183	Gprin3	GPRIN family member 3	243385	chr6 B3
1424936_a_at	120.116	136.271	99.1406	323.002	288.549	152.196	-0.00189997	0.170056	-0.191156	0.875904	1.43462	1.24762	0.444902	1.36122	0	NM_013811	Dnahc8	dynein, axonemal, heavy chain 8	13417	chr17 A3.3	0007018 // microtubule-based movement // inferred from electronic annotation
1422715_s_at	589.401	540.106	920.443	570.109	637.089	741.922	-0.00053582	-0.112979	0.729762	1.65837	-0.0232569	0.130691	0.435035	1.35194	0	NM_001110239 /// NM_021330	Acp1	acid phosphatase 1, soluble	11431	chr12 A2	0006470 // protein amino acid dephosphorylation // inferred from electronic annotation
1424303_at	55.0971	57.263	130.196	54.5506	62.7113	69.1634	-0.000790015	0.0121197	1.32258	2.50112	-0.00137074	0.179171	0.427358	1.34477	1	NM_144804	Depdc7	DEP domain containing 7	211896	chr2 E2	0007242 // intracellular signaling cascade // inferred from electronic annotation
1423706_a_at	1091.27	1140.16	1854.73	898.332	874.194	1362.69	-0.00107453	0.0831604	0.851413	1.80427	-0.275275	-0.300191	0.423717	1.34138	3	NM_001081274	Pgd	phosphogluconate dehydrogenase	110208	chr4 E2|4 77.6 cM	0006098 // pentose-phosphate shunt // inferred from electronic annotation /// 0008152 // metabolic process // inferred from electronic annotation /// 0009051 // pentose-phosphate shunt, oxidative branch // inferred from electronic annotation /// 0019322 // pentose biosynthetic process // inferred from direct assay /// 0055114 // oxidation reduction // inferred from electronic annotation	Pentose_Phosphate_Pathway // GenMAPP
1418083_at	571.481	590.241	886.059	496.324	513.383	708.48	-0.000811186	0.0605093	0.719288	1.64637	-0.181998	-0.134555	0.412555	1.33104	0	NM_025319	0610009B22Rik	RIKEN cDNA 0610009B22 gene	66050	chr11 B1.3	0006350 // transcription // inferred from electronic annotation /// 0006355 // regulation of transcription, DNA-dependent // inferred from sequence or structural similarity /// 0006810 // transport // inferred from electronic annotation /// 0006888 // ER to Golgi vesicle-mediated transport // inferred from electronic annotation /// 0016192 // vesicle-mediated transport // inferred from electronic…
1426883_at	566.737	594.496	893.627	519.118	591.173	700.683	-0.00155078	0.0890748	0.744174	1.67501	-0.101149	0.0799086	0.40904	1.3278	3	NM_134154	Slc25a45	solute carrier family 25, member 45	107375	chr19 A	0006810 // transport // inferred from electronic annotation
1452993_at	122.484	122.135	281.86	91.7588	89.8698	151.125	-0.0124338	0.00325117	1.28001	2.42841	-0.396624	-0.437096	0.407065	1.32599	0	NM_027789	5430416O09Rik	RIKEN cDNA 5430416O09 gene	71406	chr4 B1
1451690_a_at	92.6304	82.3018	171.118	80.142	88.2006	113.699	-0.00579117	-0.172519	0.971339	1.96066	-0.184009	-0.0505227	0.396408	1.31623	0	NM_001122680 /// NM_027893	Pvrl4	poliovirus receptor-related 4	71740		0007155 // cell adhesion // inferred from electronic annotation /// 0016337 // cell-cell adhesion // not recorded
1439489_at	240.683	243.744	412.085	151.386	203.964	294.81	-0.00509257	0.0356373	0.860498	1.81567	-0.645346	-0.219973	0.394654	1.31463	0	NM_181748	Gpr120	G protein-coupled receptor 120	107221	chr19 C2-C3	0007165 // signal transduction // inferred from electronic annotation /// 0007186 // G-protein coupled receptor protein signaling pathway // inferred from direct assay /// 0007186 // G-protein coupled receptor protein signaling pathway // inferred from electronic annotation /// 0046879 // hormone secretion // inferred from direct assay
1448101_s_at	661.738	635.461	1190.7	582.815	599.419	808.136	-0.00144022	-0.0426218	0.931474	1.90722	-0.163391	-0.124469	0.391658	1.3119	2	NM_009054	Trim27	tripartite motif-containing 27	19720	chr13 A3.1|13 10.0 cM	0000122 // negative regulation of transcription from RNA polymerase II promoter // not recorded /// 0006350 // transcription // inferred from electronic annotation /// 0006355 // regulation of transcription, DNA-dependent // inferred from electronic annotation /// 0045814 // negative regulation of gene expression, epigenetic // not recorded
1432158_a_at	1083.14	1112.89	1131.72	1281.42	1268.65	1322.58	-0.000701846	0.0518402	0.149825	1.10943	0.266463	0.247615	0.391106	1.3114	0	NM_025432	Trappc2	trafficking protein particle complex 2	66226	chrX F5	0006350 // transcription // inferred from electronic annotation /// 0006355 // regulation of transcription, DNA-dependent // inferred from sequence or structural similarity /// 0006810 // transport // inferred from electronic annotation /// 0006888 // ER to Golgi vesicle-mediated transport // inferred from electronic annotation /// 0016192 // vesicle-mediated transport // inferred from electronic…
1416230_at	1484.85	1378.93	2987.47	1126.56	1138.48	1809.46	-0.000226316	-0.088786	1.09457	2.1355	-0.376219	-0.364214	0.388807	1.30931	2	NM_019437	Rfk	riboflavin kinase	54391	chr19 B	0009231 // riboflavin biosynthetic process // inferred from electronic annotation
1455563_at	393.603	362.366	559.261	376.227	417.747	477.328	-0.00015553	-0.106854	0.593236	1.50863	-0.0404979	0.0997008	0.381324	1.30254	1	NM_001024922	Ddx49	DEAD (Asp-Glu-Ala-Asp) box polypeptide 49	234374	chr8 B3.3
1435948_at	342.414	332.886	538.477	254.316	282.66	416.086	-0.000822303	-0.0296753	0.740255	1.67047	-0.410768	-0.256627	0.379883	1.30124	3	NM_001033178 /// XR_031953	Tmem181 /// Tmem181c-ps	transmembrane protein 181 /// transmembrane protein 181C, pseudogene	100040525 /// 77106	chr17 A1 /// chr17 A1|17
1434501_at	25.5883	21.8717	74.9909	22.1533	23.5222	30.9316	-0.00183974	-0.20691	1.62755	3.08988	-0.185673	-0.102083	0.377122	1.29875	2	NM_001005342	Ypel4	yippee-like 4 (Drosophila)	241525	chr2 D
1454704_at	6078.33	5952.5	6104.32	6353.26	6386.83	7336.21	-0.000763599	-0.0112842	0.0927671	1.06641	0.0885717	0.0904442	0.37381	1.29577	0	NM_007644	Scarb2	scavenger receptor class B, member 2	12492	chr5 E3	0007155 // cell adhesion // inferred from electronic annotation
1452029_a_at	64.756	66.178	63.817	72.4213	67.4324	78.0703	-6.67957e-05	0.0508618	0.0637714	1.04519	0.186026	0.0775203	0.371602	1.29379	0	NM_001098233 /// NM_152821	Purg	purine-rich element binding protein G	75029	chr8 A4
1445764_at	30.3003	28.1663	30.6582	32.3032	29.1412	36.2637	-0.000801886	-0.0889748	0.103185	1.07414	0.115772	-0.0406281	0.361701	1.28494	0
1455174_at	436.119	445.771	668.477	387.808	424.902	519.548	-0.00247512	0.0518743	0.703553	1.62851	-0.146934	-0.0164179	0.356477	1.2803	0	NM_175109	Rps19bp1	ribosomal protein S19 binding protein 1	66538	chr15 E1
1419374_at	461.622	460.24	496.939	512.987	479.96	549.071	-0.000908945	0.0107743	0.191961	1.14232	0.176534	0.0746127	0.353202	1.27739	2	NM_018765	Wbp4	WW domain binding protein 4	22380	chr14 D3	0006397 // mRNA processing // inferred from electronic annotation /// 0008380 // RNA splicing // inferred from electronic annotation	mRNA_processing_binding_Reactome // GenMAPP
1429669_at	53.7931	60.571	69.0226	61.6588	60.6349	63.7889	-0.000133675	0.173695	0.446604	1.36283	0.221718	0.193059	0.349394	1.27403	0	NR_026888	4930488L21Rik	RIKEN cDNA 4930488L21 gene	75809	chr8 C5
1428919_at	455.009	450.518	762.261	421.912	464.088	539.14	-0.00270222	0.00362295	0.830227	1.77796	-0.0833877	0.0479676	0.346697	1.27165	1	NM_201230	Fgfr1op	Fgfr1 oncogene partner	75296	chr17 A1	0034453 // microtubule anchoring // inferred from electronic annotation
1424433_at	361.503	380.638	654.579	322.726	335.819	427.926	-0.00408443	0.0927376	0.94387	1.92368	-0.138925	-0.088126	0.34525	1.27037	0	NM_029619	Msrb2	methionine sulfoxide reductase B2	76467	chr2 A2	0030091 // protein repair // inferred from direct assay /// 0055114 // oxidation reduction // inferred from electronic annotation
1420499_at	359.009	317.188	555.06	243.462	311.386	422.177	-0.00316166	-0.173246	0.714098	1.64046	-0.540009	-0.187511	0.336491	1.26268	0	NM_008102	Gch1	GTP cyclohydrolase 1	14528	chr14 C2-3|14 19.5 cM	0006729 // tetrahydrobiopterin biosynthetic process // inferred by curator /// 0006729 // tetrahydrobiopterin biosynthetic process // inferred from electronic annotation /// 0006917 // induction of apoptosis // inferred from electronic annotation /// 0008217 // regulation of blood pressure // inferred from mutant phenotype /// 0014916 // regulation of lung blood pressure // inferred from mutant p…
1416576_at	435.434	414.402	724.71	315.427	353.649	511.981	-0.000104586	-0.0536148	0.818237	1.76325	-0.447165	-0.280308	0.336191	1.26242	0	NM_007707	Socs3	suppressor of cytokine signaling 3	12702	chr11 E2	0001932 // regulation of protein amino acid phosphorylation // inferred from direct assay /// 0007242 // intracellular signaling cascade // inferred from electronic annotation /// 0009968 // negative regulation of signal transduction // inferred from genetic interaction /// 0009968 // negative regulation of signal transduction // inferred from electronic annotation /// 0019941 // modification-dep…
1455959_s_at	2258.95	2221.29	3470.62	1157.83	1231.46	2656.7	-0.000483756	-0.00597069	0.703026	1.62792	-0.941015	-0.855102	0.333294	1.25989	3	NM_010295	Gclc	Glutamate-cysteine ligase, catalytic subunit, mRNA (cDNA clone MGC:30487 IMAGE:4195425)	14629	chr9 D-E|9 42.0 cM	0006534 // cysteine metabolic process // inferred from electronic annotation /// 0006534 // cysteine metabolic process // inferred from sequence or structural similarity /// 0006536 // glutamate metabolic process // inferred from electronic annotation /// 0006536 // glutamate metabolic process // inferred from sequence or structural similarity /// 0006749 // glutathione metabolic process // infer…
1448799_s_at	793.014	820.887	1194.58	749.258	760.751	925.5	-0.00340967	0.0683675	0.678154	1.60009	-0.057759	-0.0392987	0.326367	1.25385	0	NM_011885	Mrps12	mitochondrial ribosomal protein S12	24030	chr7 A3	0006412 // translation // inferred from electronic annotation	Apoptosis // GenMAPP
1449196_a_at	11883.2	12269.6	12948.1	13143.2	12511.1	13854.6	-0.000937683	0.065095	0.210393	1.157	0.169729	0.0940773	0.32432	1.25207	2	NM_001033865 /// NM_024277 /// XR_031334 /// XR_031687 /// XR_033402 /// XR_033646	EG668779 /// LOC100042019 /// Rps27a	predicted gene, EG668779 /// similar to fusion protein: ubiquitin (bases 43_513); ribosomal protein S27a (bases 217_532) /// ribosomal protein S27A	100042019 /// 668779 /// 78294	chr11 A3.3 /// chr7 B5	0006412 // translation // inferred from electronic annotation /// 0006464 // protein modification process // inferred from electronic annotation /// 0016567 // protein ubiquitination // inferred from electronic annotation /// 0045941 // positive regulation of transcription // inferred from electronic annotation
1422547_at	1552.81	1622.92	2143.09	1447.3	1507.7	1808.1	-0.000365929	0.0763813	0.550746	1.46484	-0.076791	-0.0221185	0.322892	1.25084	0	NM_011239	Ranbp1	RAN binding protein 1	19385	chr16 A3|16 10.9 cM	0007051 // spindle organization // inferred from direct assay /// 0046604 // positive regulation of mitotic centrosome separation // inferred from direct assay /// 0046907 // intracellular transport // inferred from electronic annotation
1459345_at	38.5857	42.3151	39.102	41.3234	37.8544	44.7042	-0.00108962	0.150792	0.105286	1.07571	0.124198	-0.00728621	0.315777	1.24468	0
1424383_at	659.747	589.535	1101.88	546.511	602.776	765.407	-0.000764039	-0.142964	0.826808	1.77376	-0.252631	-0.109721	0.314812	1.24385	1	NM_145402	Tmem51	transmembrane protein 51	214359	chr4 E1
1416000_a_at	8645.39	9279.55	11604.3	7750.88	8093.77	9913.9	-0.000681202	0.120797	0.511056	1.42509	-0.133328	-0.0751694	0.300243	1.23135	3	NM_011034	Prdx1	peroxiredoxin 1	18477	chr4 D1|4 47.0 cM	0000302 // response to reactive oxygen species // inferred from mutant phenotype /// 0006979 // response to oxidative stress // inferred from direct assay /// 0006979 // response to oxidative stress // inferred from mutant phenotype /// 0008283 // cell proliferation // inferred from mutant phenotype /// 0019430 // removal of superoxide radicals // inferred from mutant phenotype /// 0032872 // reg…
1427358_a_at	992.489	978.078	1469.8	680.041	703.554	1127.33	-0.00085557	-0.003308	0.652759	1.57217	-0.522469	-0.476317	0.283285	1.21696	2	NM_029653 /// NM_134062	Dapk1	death associated protein kinase 1	69635	chr13 B2|13 40.0 cM	0006468 // protein amino acid phosphorylation // inferred from direct assay /// 0006468 // protein amino acid phosphorylation // inferred from electronic annotation /// 0006915 // apoptosis // inferred from electronic annotation /// 0006916 // anti-apoptosis // inferred from mutant phenotype /// 0007165 // signal transduction // inferred from electronic annotation /// 0007243 // protein kinase ca…
1420626_at	551.497	504.207	797.988	471.039	505.628	620.827	-0.00116379	-0.117222	0.619983	1.53686	-0.204362	-0.104764	0.272391	1.20781	2	NM_026113	Gtf3c6	general transcription factor IIIC, polypeptide 6, alpha	67371	chr10 B1	0006350 // transcription // inferred from electronic annotation /// 0006351 // transcription, DNA-dependent // inferred from electronic annotation
1421903_at	177.988	180.331	268.634	172.931	184.372	199.937	-0.000144102	0.0374877	0.680194	1.60235	-0.0211866	0.0701493	0.271152	1.20677	0	NM_026042	Med29	mediator complex subunit 29	67224	chr7 A3	0006350 // transcription // inferred from electronic annotation /// 0006355 // regulation of transcription, DNA-dependent // inferred from electronic annotation
1439075_at	197.263	163.348	145.404	339.652	274.223	220.563	-0.00919517	-0.276683	-0.355819	0.781426	0.799206	0.491118	0.259712	1.19724	0	NM_029763	Polr3f	polymerase (RNA) III (DNA directed) polypeptide F	70408	chr2 H1	0006350 // transcription // inferred from electronic annotation
1436237_at	125.379	95.1368	242.751	71.4291	73.7399	141.827	-0.0118251	-0.421513	1.03753	2.05272	-0.808027	-0.744318	0.258696	1.1964	0	NM_001033149	Ttc9	tetratricopeptide repeat domain 9	69480	chr12 D1	0006457 // protein folding // inferred from electronic annotation
1433702_at	892.184	825.27	1477.42	830.322	837.051	990.2	-0.000833022	-0.0958484	0.810343	1.75363	-0.0796465	-0.0729978	0.252131	1.19096	0	NM_001081213	Ermp1	endoplasmic reticulum metallopeptidase 1	226090	chr19 C1|19 24.5 cM	0006508 // proteolysis // inferred from electronic annotation
1418932_at	103.701	96.6495	339.144	59.2831	60.6538	115.184	-0.0337506	-0.115339	1.77954	3.43316	-0.785865	-0.753785	0.249358	1.18868	0	NM_017373 /// XM_001475817	LOC100046232 /// Nfil3	similar to NFIL3/E4BP4 transcription factor /// nuclear factor, interleukin 3, regulated	100046232 /// 18030	chr13 B1|13 32.0 cM	0006350 // transcription // inferred from electronic annotation /// 0006355 // regulation of transcription, DNA-dependent // inferred from electronic annotation /// 0048511 // rhythmic process // inferred from electronic annotation
1436876_at	158.229	157.945	261.51	165.515	179.903	175.059	-9.03271e-05	0.0128193	0.811086	1.75453	0.0886634	0.201429	0.249001	1.18838	0	NM_029879	Rgs7bp	regulator of G-protein signalling 7 binding protein	52882	chr13 D1|13 57.0 cM	0007186 // G-protein coupled receptor protein signaling pathway // inferred from direct assay /// 0009968 // negative regulation of signal transduction // inferred from electronic annotation
1424770_at	1460.91	1394.43	2659.56	1338.58	1413.1	1614.3	-0.00035162	-0.0530875	0.947797	1.92892	-0.101498	-0.0299139	0.247513	1.18716	0	NM_145575	Cald1	caldesmon 1	109624	chr6 B1|6 11.5 cM	0006936 // muscle contraction // inferred from electronic annotation /// 0006940 // regulation of smooth muscle contraction // traceable author statement	Smooth_muscle_contraction // GenMAPP
1426915_at	1565.36	1354.4	2006.36	1071.07	1066.27	1731.8	-0.0024252	-0.19097	0.444312	1.36066	-0.526491	-0.534301	0.247248	1.18694	3	NM_029653 /// NM_134062	Dapk1	death associated protein kinase 1	69635	chr13 B2|13 40.0 cM	0006468 // protein amino acid phosphorylation // inferred from direct assay /// 0006468 // protein amino acid phosphorylation // inferred from electronic annotation /// 0006915 // apoptosis // inferred from electronic annotation /// 0006916 // anti-apoptosis // inferred from mutant phenotype /// 0007165 // signal transduction // inferred from electronic annotation /// 0007243 // protein kinase ca…
1441416_at	31.7094	33.3313	65.2269	26.3979	28.0465	34.6358	-0.0139288	0.090252	1.12205	2.17657	-0.241009	-0.157355	0.229999	1.17283	0	NM_001024617	Inpp4b	inositol polyphosphate-4-phosphatase, type II	234515	chr8 C2|8 38.0 cM	0048016 // inositol phosphate-mediated signaling // not recorded
1439849_at	188.471	164.668	157.468	302.921	291.099	205.511	-0.00248127	-0.17844	-0.192059	0.875355	0.704903	0.646293	0.227956	1.17117	3	NM_001085549 /// XM_981216	OTTMUSG00000008561	predicted gene, OTTMUSG00000008561	666048	chr4 D1|4
1457026_at	655.363	514.157	964.77	410.981	403.369	712.222	-0.00283441	-0.329965	0.643163	1.56175	-0.648768	-0.694726	0.218824	1.16378	3	NM_001083894 /// NM_153404	Liph	lipase, member H	239759	chr16 B1|16 14.8 cM	0006629 // lipid metabolic process // inferred from electronic annotation /// 0016042 // lipid catabolic process // inferred from electronic annotation	Statin_Pathway_PharmGKB // GenMAPP
1424990_at	884.4	809.999	1225.84	776.832	902.736	957.243	-0.000990115	-0.109366	0.558126	1.47236	-0.162425	0.0501325	0.217312	1.16257	0	NM_175423	Orai1	ORAI calcium release-activated calcium modulator 1	109305	chr5 F	0006810 // transport // inferred from electronic annotation /// 0006811 // ion transport // inferred from electronic annotation /// 0006816 // calcium ion transport // inferred from electronic annotation /// 0006955 // immune response // inferred from electronic annotation /// 0051928 // positive regulation of calcium ion transport // inferred from electronic annotation /// 0051928 // positive re…
1434436_at	99.5574	84.8884	268.661	89.8235	73.4753	107.649	-0.00948363	-0.234628	1.51308	2.85418	-0.145035	-0.444538	0.213336	1.15937	0	NM_029413	Morc4	microrchidia 4	75746	chrX F1
1453173_at	524.662	549.1	709.758	438.798	549.797	565.101	-0.000745927	0.0816824	0.522675	1.43662	-0.233313	0.0862002	0.209875	1.15659	2	NM_172398	2310005E10Rik	RIKEN cDNA 2310005E10 gene	67861	chr6 B1	0055114 // oxidation reduction // inferred from electronic annotation
1416980_at	46.556	53.6281	86.1298	43.2839	45.7179	50.0571	-0.00585799	0.188173	0.971982	1.96153	-0.0854456	-0.0108286	0.20302	1.15111	2	NM_027853	Mettl7b	methyltransferase like 7B	71664	chr10 D3	0008152 // metabolic process // inferred from electronic annotation
1421816_at	401.059	370.355	607.904	288.289	293.028	429.525	-0.000671982	-0.0960743	0.684636	1.6073	-0.452251	-0.432499	0.199298	1.14814	0	XM_904332	LOC630729	similar to Glutathione reductase, mitochondrial precursor (GR) (GRase)	630729		0006749 // glutathione metabolic process // inferred by curator /// 0006749 // glutathione metabolic process // inferred from electronic annotation /// 0045454 // cell redox homeostasis // inferred from electronic annotation /// 0055114 // oxidation reduction // inferred from electronic annotation
1457149_at	68.8122	78.2813	103.934	57.309	64.5132	73.5987	-0.00530866	0.197501	0.679676	1.60178	-0.241942	-0.0739236	0.19776	1.14692	3	NM_177667	Ttc22	tetratricopeptide repeat domain 22	230576	chr4 C7
1440834_at	68.9152	79.5721	90.035	65.0209	70.9344	72.4068	-0.000974423	0.1948	0.471841	1.38688	-0.059326	0.0528588	0.174144	1.1283	2	NM_001033227	Slc5a10	solute carrier family 5 (sodium/glucose cotransporter), member 10	109342	chr11 B2	0006810 // transport // inferred from electronic annotation /// 0006811 // ion transport // inferred from electronic annotation /// 0006814 // sodium ion transport // inferred from electronic annotation
1444058_at	30.8036	26.0322	50.1405	24.2661	27.1849	32.3631	-0.00599063	-0.262763	0.785628	1.72384	-0.323438	-0.164521	0.169258	1.12448	3	NM_001110017 /// NM_027341	Dzip3	DAZ interacting protein 3, zinc finger	224170	chr16 B5	0000209 // protein polyubiquitination // inferred from electronic annotation /// 0019941 // modification-dependent protein catabolic process // inferred from electronic annotation
1450891_at	1256.3	1155.65	1624.52	1143.45	1168.92	1311.5	-0.000597502	-0.104713	0.45692	1.37261	-0.111297	-0.0845095	0.164452	1.12074	1	NM_025527	Srp19	signal recognition particle 19	66384	chr18 B3	0006614 // SRP-dependent cotranslational protein targeting to membrane // inferred from electronic annotation	mRNA_processing_binding_Reactome // GenMAPP
1431255_at	30.569	34.5364	28.0886	40.1919	29.1144	31.7894	-2.95397e-05	0.140363	-0.0416632	0.971534	0.419146	-0.0516682	0.159727	1.11708	0	NM_028500 /// NM_029782	Calr3	calreticulin 3	73316	chr8 C1	0006457 // protein folding // inferred from electronic annotation
1448269_a_at	526.287	551.963	1281.16	483.101	478.557	544.478	-0.00637471	0.0826372	1.37063	2.58584	-0.104681	-0.128564	0.152608	1.11158	0	NM_026167	Klhl13	kelch-like 13 (Drosophila)	67455	chrX A2	0019941 // modification-dependent protein catabolic process // inferred from electronic annotation
1455241_at	22.1086	22.4486	36.2587	17.1562	20.4573	22.7534	-0.00698126	0.0330386	0.797805	1.73845	-0.343407	-0.0955412	0.143029	1.10422	0	NM_172295	BC037703	cDNA sequence BC037703	242125	chr3 F2.2
1416072_at	1677.79	1798.5	1177.53	2034.81	2546.11	1723.76	-6.20188e-05	0.117803	-0.434213	0.740097	0.302217	0.621472	0.141621	1.10314	2	NM_001111059 /// NM_133654	Cd34	CD34 antigen	12490	chr1 H6|1 106.6 cM	0007155 // cell adhesion // inferred from electronic annotation /// 0050900 // leukocyte migration // inferred from mutant phenotype
1450881_s_at	1496.85	1479.64	1064.71	1836.84	1946.22	1537.23	-0.00098437	-0.000273938	-0.407767	0.753789	0.316012	0.397407	0.140118	1.102	3	NM_031999	Gpr137b	G protein-coupled receptor 137B	83924	chr13 A1|13 6.0 cM
1424344_s_at	608.646	562.591	740.446	520.857	560.107	622.432	-0.000254778	-0.0941078	0.369348	1.29177	-0.202226	-0.101337	0.13536	1.09837	3	NM_010120	Eif1a	eukaryotic translation initiation factor 1A	13664	chr18 C	0006412 // translation // inferred from electronic annotation /// 0006413 // translational initiation // inferred from electronic annotation	Translation_Factors // GenMAPP
1422753_a_at	198.84	210.093	293.934	161.111	179.917	203.727	-0.000434104	0.0872866	0.650599	1.56982	-0.287157	-0.126109	0.133955	1.0973	0	NM_025901	Polr3k	polymerase (RNA) III (DNA directed) polypeptide K	67005	chr2 H4	0006350 // transcription // inferred from electronic annotation /// 0045449 // regulation of transcription // inferred from electronic annotation	RNA_transcription_Reactome // GenMAPP
1448354_at	844.429	933.081	1282.41	733.216	769.776	861.785	-0.00207815	0.162842	0.688781	1.61192	-0.19256	-0.115231	0.132376	1.0961	3	NM_008062	G6pdx	glucose-6-phosphate dehydrogenase X-linked	14381	chrX A2-A3|X 30.02 cM	0001816 // cytokine production // inferred from mutant phenotype /// 0001998 // angiotensin mediated vasoconstriction involved in regulation of systemic arterial blood pressure // inferred from mutant phenotype /// 0002033 // vasodilation by angiotensin involved in regulation of systemic arterial blood pressure // inferred from mutant phenotype /// 0005975 // carbohydrate metabolic process // inf…	Pentose_Phosphate_Pathway // GenMAPP
1434318_a_at	556.436	610.798	699.069	520.162	551.215	567.674	-0.000703767	0.150404	0.416213	1.33442	-0.073514	0.00639678	0.132008	1.09582	0	NM_001105196 /// NM_172472	Tcfe3	transcription factor E3	209446	chrX A2	0006350 // transcription // inferred from electronic annotation /// 0006355 // regulation of transcription, DNA-dependent // inferred from electronic annotation /// 0045449 // regulation of transcription // inferred from electronic annotation /// 0045670 // regulation of osteoclast differentiation // inferred from genetic interaction /// 0045893 // positive regulation of transcription, DNA-depend…	TGF_Beta_Signaling_Pathway // GenMAPP
1418844_at	444.268	392.381	548.212	378.875	415.158	452.83	-0.000361309	-0.171866	0.389251	1.30971	-0.205173	-0.0779486	0.131058	1.0951	2	NM_133981	Alg9	asparagine-linked glycosylation 9 homolog (yeast, alpha 1,2 mannosyltransferase)	102580	chr9 A5.3	0006506 // GPI anchor biosynthetic process // inferred from electronic annotation
1447861_x_at	99.5494	128.625	63.4245	127.623	134.684	101.746	-0.00170037	0.387589	-0.569854	0.673685	0.382748	0.4553	0.129591	1.09398	0	NM_001136072 /// NM_001159567 /// NM_001159568 /// NM_001159569 /// NM_001159570 /// NM_010825	Meis2	Meis homeobox 2	17536	chr2 E4-E5|2 64.0 cM	0001654 // eye development // inferred from genetic interaction /// 0006355 // regulation of transcription, DNA-dependent // inferred from electronic annotation /// 0045449 // regulation of transcription // inferred from electronic annotation /// 0045944 // positive regulation of transcription from RNA polymerase II promoter // inferred from genetic interaction
1434460_at	78.3232	93.3104	55.8483	102.761	92.4348	79.6045	-0.00593171	0.271367	-0.407744	0.753801	0.414987	0.255811	0.126004	1.09127	2	NM_175325	Bbs4	Bardet-Biedl syndrome 4 (human)	102774	chr9 B|9 33.0 cM	0000226 // microtubule cytoskeleton organization // inferred from mutant phenotype /// 0001843 // neural tube closure // inferred from mutant phenotype /// 0001895 // retina homeostasis // inferred from mutant phenotype /// 0007286 // spermatid development // inferred from mutant phenotype /// 0007608 // sensory perception of smell // inferred from mutant phenotype /// 0016358 // dendrite develop…
1437395_at	671.26	584.566	475.719	895.741	820.931	682.085	-0.00668589	-0.183677	-0.411145	0.752026	0.434243	0.308567	0.124605	1.09021	0	NM_175472	Zcchc11	zinc finger, CCHC domain containing 11	230594	chr4 C7	0001816 // cytokine production // inferred from direct assay /// 0031664 // regulation of lipopolysaccharide-mediated signaling pathway // inferred from direct assay /// 0032088 // negative regulation of NF-kappaB transcription factor activity // inferred from direct assay
1420841_at	1777.44	1907.15	3667.01	864.343	917.159	1801.9	-0.000857029	0.120881	1.12945	2.18775	-1.01478	-0.941775	0.123012	1.08901	3	NM_011213	Ptprf	protein tyrosine phosphatase, receptor type, F	19268	chr4 C6-D1	0006470 // protein amino acid dephosphorylation // inferred from electronic annotation /// 0007155 // cell adhesion // inferred from electronic annotation /// 0007156 // homophilic cell adhesion // inferred from electronic annotation /// 0007399 // nervous system development // inferred from electronic annotation /// 0016311 // dephosphorylation // inferred from electronic annotation
1424279_at	27.9348	31.4502	55.0776	22.7492	18.9899	28.3595	-0.00432402	0.151108	1.05885	2.08327	-0.2742	-0.539235	0.121609	1.08795	0	NM_001111048 /// NM_010196	Fga	fibrinogen alpha chain	14161	chr3 F1|3 44.8 cM	0007165 // signal transduction // inferred from electronic annotation /// 0007596 // blood coagulation // inferred from mutant phenotype /// 0030168 // platelet activation // inferred from electronic annotation /// 0051258 // protein polymerization // inferred from electronic annotation	Blood_Clotting_Cascade // GenMAPP
1420843_at	5089.61	5901.47	8689.4	3031.64	3308.24	5130.57	-0.00203805	0.233176	0.859034	1.81382	-0.72969	-0.602465	0.114536	1.08263	2	NM_011213	Ptprf	protein tyrosine phosphatase, receptor type, F	19268	chr4 C6-D1	0006470 // protein amino acid dephosphorylation // inferred from electronic annotation /// 0007155 // cell adhesion // inferred from electronic annotation /// 0007156 // homophilic cell adhesion // inferred from electronic annotation /// 0007399 // nervous system development // inferred from electronic annotation /// 0016311 // dephosphorylation // inferred from electronic annotation
1428073_a_at	1081.1	979.511	1333.68	971.107	1006.25	1085.67	-0.000622455	-0.123006	0.387635	1.30825	-0.130041	-0.0855682	0.109432	1.0788	3	NM_001083331 /// NM_172394	Nup88	nucleoporin 88	19069	chr11 B4|11 42.0 cM	0006810 // transport // inferred from electronic annotation /// 0015031 // protein transport // inferred from electronic annotation /// 0051028 // mRNA transport // inferred from electronic annotation /// 0065002 // intracellular protein transmembrane transport // inferred from electronic annotation
1455711_at	278.97	272.533	415.113	218.439	208.92	280.11	-0.00452567	-0.021889	0.659352	1.57937	-0.334561	-0.396849	0.107401	1.07729	2	NM_172442	Dtx4	deltex 4 homolog (Drosophila)	207521	chr19 A	0007219 // Notch signaling pathway // inferred from electronic annotation
1425080_at	32.2672	34.4785	27.5809	39.4044	34.8217	32.3549	-0.00114459	0.112137	-0.14044	0.907243	0.312495	0.129695	0.106005	1.07624	0	NM_138949	Zfp286	zinc finger protein 286	192651	chr11 B2	0006350 // transcription // inferred from electronic annotation /// 0006355 // regulation of transcription, DNA-dependent // inferred from electronic annotation
1454905_at	380.024	320.423	639.723	345.502	333.97	379.671	-0.000758891	-0.232875	0.838238	1.78786	-0.11346	-0.16852	0.0991614	1.07115	3	NM_001081282	Ibtk	inhibitor of Bruton agammaglobulinemia tyrosine kinase	108837	chr9 E3.1	0001933 // negative regulation of protein amino acid phosphorylation // not recorded /// 0051209 // release of sequestered calcium ion into cytosol // not recorded
1448353_x_at	2747.69	2741.35	3631.89	2358.02	2437.64	2736.62	-0.00284643	0.0150978	0.489398	1.40386	-0.200171	-0.15247	0.0970743	1.0696	0	NM_133933	Rpn1	ribophorin I	103963	chr6 D1|6 38.0 cM	0006486 // protein amino acid glycosylation // inferred from electronic annotation	Proteasome_Degradation // GenMAPP
1434317_s_at	242.977	220.915	286.935	235.139	245.029	241.962	-0.00010705	-0.12178	0.326378	1.25386	-0.0229567	0.0270035	0.0965217	1.06919	3	NM_172304	Tex10	testis expressed gene 10	269536	chr4 B1
1430700_a_at	416.779	334.627	862.476	279.836	320.948	416.042	-0.00925886	-0.299209	1.12272	2.17758	-0.55269	-0.374214	0.0957611	1.06863	0	NM_013737	Pla2g7	phospholipase A2, group VII (platelet-activating factor acetylhydrolase, plasma)	27226	chr17 C	0006954 // inflammatory response // traceable author statement /// 0016042 // lipid catabolic process // inferred from electronic annotation
1457644_s_at	387.408	230.708	819.233	168.288	188.369	382.285	-0.00389233	-0.732448	1.16243	2.23834	-1.18641	-1.02511	0.0841511	1.06006	0	NM_008176	Cxcl1	chemokine (C-X-C motif) ligand 1	14825	chr5 E-F|5 51.0 cM	0006954 // inflammatory response // inferred from electronic annotation /// 0006955 // immune response // inferred from electronic annotation
1456779_a_at	90.3247	74.7138	71.3904	135.402	107.605	88.9766	-0.00150675	-0.309531	-0.260926	0.834552	0.606343	0.261721	0.0804694	1.05736	0		4930414L22Rik	RIKEN cDNA 4930414L22 gene	78108
1417376_a_at	1972.41	1968.8	1291.92	2394.77	2359.33	1937.78	-0.000896562	0.0141429	-0.526318	0.694325	0.298608	0.278017	0.074948	1.05332	2	NM_001025600 /// NM_018770 /// NM_207675 /// NM_207676	Cadm1	cell adhesion molecule 1	54725	chr9 B-C	0006915 // apoptosis // inferred from electronic annotation /// 0006955 // immune response // inferred from electronic annotation /// 0007049 // cell cycle // inferred from electronic annotation /// 0007155 // cell adhesion // inferred from direct assay /// 0007155 // cell adhesion // inferred from electronic annotation /// 0007156 // homophilic cell adhesion // inferred from direct assay /// 000…
1456498_at	118.405	118.792	38.7912	312.627	297.243	119.903	-0.0761557	-0.035039	-1.66527	0.315286	1.42149	1.34339	0.0737244	1.05243	0	NM_010576	Itga4	integrin alpha 4	16401	chr2 C3|2 46.0 cM	0001974 // blood vessel remodeling // inferred from mutant phenotype /// 0007155 // cell adhesion // inferred from mutant phenotype /// 0007155 // cell adhesion // inferred from electronic annotation /// 0007157 // heterophilic cell adhesion // inferred from mutant phenotype /// 0007159 // leukocyte adhesion // inferred from mutant phenotype /// 0007229 // integrin-mediated signaling pathway // i…	Integrin-mediated_cell_adhesion_KEGG // GenMAPP
1426261_s_at	553.666	554.599	860.658	256.911	263.433	538.747	-0.00376024	0.0148296	0.709368	1.63509	-1.09404	-1.06074	0.0614338	1.0435	0	NM_013701 /// NM_145079 /// NM_201410 /// NM_201641 /// NM_201642 /// NM_201643 /// NM_201644 /// NM_201645	Ugt1a1 /// Ugt1a10 /// Ugt1a2 /// Ugt1a5 /// Ugt1a6a /// Ugt1a6b /// Ugt1a7c /// Ugt1a9	UDP glucuronosyltransferase 1 family, polypeptide A1 /// UDP glycosyltransferase 1 family, polypeptide A10 /// UDP glucuronosyltransferase 1 family, polypeptide A2 /// UDP glucuronosyltransferase 1 family, polypeptide A5 /// UDP glucuronosyltransferase 1 family, polypeptide A6A /// UDP glucuronosyltransferase 1 family, polypeptide A6B /// UDP glucuronosyltransferase 1 family, polypeptide A7C /// …	22236 /// 394430 /// 394432 /// 394433 /// 394434 /// 394435 /// 394436 /// 94284	chr1 D /// chr1 D|1 51.7 cM	0007584 // response to nutrient // inferred from electronic annotation /// 0008152 // metabolic process // inferred from electronic annotation /// 0018879 // biphenyl metabolic process // inferred from electronic annotation /// 0019585 // glucuronate metabolic process // inferred from direct assay /// 0019585 // glucuronate metabolic process // not recorded /// 0042493 // response to drug // infe…	Irinotecan_pathway_PharmGKB // GenMAPP
1460167_at	724.272	758.104	1021.26	706.587	732.547	703.577	-0.00157556	0.0845964	0.582069	1.49699	-0.0104827	0.0368309	0.0608429	1.04308	0	NM_001127338 /// NM_138600	Aldh7a1	aldehyde dehydrogenase family 7, member A1	110695	chr18 D3|18 29.0 cM	0008152 // metabolic process // inferred from electronic annotation /// 0055114 // oxidation reduction // inferred from electronic annotation
1460068_at	28.4478	31.1677	38.706	25.5736	26.9082	27.5625	-0.00176808	0.145079	0.529463	1.44339	-0.131445	-0.069737	0.0568414	1.04019	0	NM_001160214 /// NM_211355	Smek1	SMEK homolog 1, suppressor of mek1 (Dictyostelium)	68734	chr12 E
1426260_a_at	1997.41	2088.61	3235.94	961.099	998.36	1932.82	-0.00624364	0.0827681	0.782147	1.71969	-1.03688	-0.979372	0.0555289	1.03924	0	NM_013701 /// NM_145079 /// NM_201410 /// NM_201641 /// NM_201642 /// NM_201643 /// NM_201644 /// NM_201645	Ugt1a1 /// Ugt1a10 /// Ugt1a2 /// Ugt1a5 /// Ugt1a6a /// Ugt1a6b /// Ugt1a7c /// Ugt1a9	UDP glucuronosyltransferase 1 family, polypeptide A1 /// UDP glycosyltransferase 1 family, polypeptide A10 /// UDP glucuronosyltransferase 1 family, polypeptide A2 /// UDP glucuronosyltransferase 1 family, polypeptide A5 /// UDP glucuronosyltransferase 1 family, polypeptide A6A /// UDP glucuronosyltransferase 1 family, polypeptide A6B /// UDP glucuronosyltransferase 1 family, polypeptide A7C /// …	22236 /// 394430 /// 394432 /// 394433 /// 394434 /// 394435 /// 394436 /// 94284	chr1 D /// chr1 D|1 51.7 cM	0007584 // response to nutrient // inferred from electronic annotation /// 0008152 // metabolic process // inferred from electronic annotation /// 0018879 // biphenyl metabolic process // inferred from electronic annotation /// 0019585 // glucuronate metabolic process // inferred from direct assay /// 0019585 // glucuronate metabolic process // not recorded /// 0042493 // response to drug // infe…	Irinotecan_pathway_PharmGKB // GenMAPP
1423293_at	1081.28	1054.24	924.604	1244.13	1183.88	1045.28	-0.000384304	-0.0192971	-0.139421	0.907884	0.227342	0.150594	0.0537071	1.03793	0	NM_026653	Rpa1	replication protein A1	68275	chr11 B5|11 44.0 cM	0000724 // double-strand break repair via homologous recombination // inferred from mutant phenotype /// 0001701 // in utero embryonic development // inferred from mutant phenotype /// 0006260 // DNA replication // inferred from electronic annotation /// 0007126 // meiosis // inferred from direct assay /// 0008284 // positive regulation of cell proliferation // inferred from mutant phenotype /// …	DNA_replication_Reactome // GenMAPP /// G1_to_S_cell_cycle_Reactome // GenMAPP
1448141_at	397.418	389.988	456.888	361.287	367.192	383.971	-0.000454766	-0.00800711	0.28814	1.22106	-0.113285	-0.095276	0.0537012	1.03792	1	NM_029101	Rrp7a	ribosomal RNA processing 7 homolog A (S. cerevisiae)	74778	chr15 E1
1418183_a_at	730.416	705.056	593.396	805.78	813.949	704.762	-0.000614388	-0.0323718	-0.215301	0.861366	0.165791	0.17457	0.0515408	1.03637	3	NM_001112699 /// NM_001112700 /// NM_011180	Cyth1	cytohesin 1	19157	chr11 E2	0030155 // regulation of cell adhesion // inferred from electronic annotation /// 0032012 // regulation of ARF protein signal transduction // inferred from electronic annotation
1451386_at	591.164	631.865	761.2	539.278	546.097	567.299	-0.00228982	0.114865	0.452194	1.36812	-0.106987	-0.0949812	0.0438619	1.03087	0	NM_144923	Blvrb	biliverdin reductase B (flavin reductase (NADPH))	233016	chr7 A3	0008152 // metabolic process // inferred from electronic annotation /// 0044237 // cellular metabolic process // inferred from electronic annotation /// 0055114 // oxidation reduction // inferred from electronic annotation
1438779_at	832.615	774.732	520.621	995.735	915.128	799.897	-0.00201515	-0.0888974	-0.592244	0.66331	0.276381	0.155676	0.0431042	1.03033	3	NM_007734	Col4a3	collagen, type IV, alpha 3	12828	chr1 C5	0006917 // induction of apoptosis // inferred from sequence or structural similarity /// 0006919 // activation of caspase activity // inferred from sequence or structural similarity /// 0007155 // cell adhesion // inferred from electronic annotation /// 0007166 // cell surface receptor linked signal transduction // inferred from direct assay /// 0008283 // cell proliferation // inferred from sequ…	mRNA_processing_binding_Reactome // GenMAPP
1423924_s_at	1587.81	1510.3	2253.26	1460	1427.55	1522.75	-0.00183832	-0.0523151	0.591617	1.50694	-0.0994351	-0.132678	0.0423128	1.02976	0	NM_145928	Tspan14	tetraspanin 14	52588	chr14 B|14 14.5 cM
1418133_at	396.305	355.585	469.064	237.125	301.271	378.096	-0.00696138	-0.138381	0.330045	1.25705	-0.721122	-0.377532	0.033962	1.02382	0	NM_033601	Bcl3	B-cell leukemia/lymphoma 3	12051	chr7 A3|7 6.5 cM	0000060 // protein import into nucleus, translocation // inferred from electronic annotation /// 0002268 // follicular dendritic cell differentiation // inferred from mutant phenotype /// 0002315 // marginal zone B cell differentiation // inferred from mutant phenotype /// 0002455 // humoral immune response mediated by circulating immunoglobulin // inferred from mutant phenotype /// 0002467 // ge…
1422707_at	293.738	292.285	417.338	271.473	293.911	279.952	-0.000965918	0.0122666	0.592231	1.50758	-0.0932055	0.0169785	0.0329861	1.02313	1	NM_001146200 /// NM_001146201 /// NM_020272	Pik3cg	phosphoinositide-3-kinase, catalytic, gamma polypeptide	30955	chr12 B	0006468 // protein amino acid phosphorylation // inferred from direct assay /// 0043066 // negative regulation of apoptosis // inferred from direct assay /// 0046854 // phosphoinositide phosphorylation // inferred from electronic annotation /// 0048015 // phosphoinositide-mediated signaling // inferred from electronic annotation
1451503_at	267.737	311.895	359.158	310.749	334.566	254.556	-0.00108254	0.236455	0.510784	1.42482	0.240199	0.342185	0.0297071	1.0208	0	NM_030152	Nol3	nucleolar protein 3 (apoptosis repressor with CARD domain)	78688	chr8 D1|8 51.0 cM	0001666 // response to hypoxia // inferred from electronic annotation /// 0006397 // mRNA processing // inferred from electronic annotation /// 0008380 // RNA splicing // inferred from electronic annotation /// 0042981 // regulation of apoptosis // inferred from electronic annotation
1434597_at	2291.59	2089.68	2663.42	1885.06	1977.53	2169.01	-0.00136065	-0.113545	0.303565	1.23419	-0.25639	-0.192811	0.0244584	1.0171	2	NM_172585	Larp5	La ribonucleoprotein domain family, member 5	217980	chr13 A1|13 5.0 cM
1424783_a_at	1433.19	1467.41	2183.32	763.142	772.577	1352.21	-0.00593939	0.0525413	0.693441	1.61714	-0.89438	-0.873466	0.0198803	1.01388	3	NM_013701 /// NM_145079 /// NM_201410 /// NM_201641 /// NM_201642 /// NM_201643 /// NM_201644 /// NM_201645	Ugt1a1 /// Ugt1a10 /// Ugt1a2 /// Ugt1a5 /// Ugt1a6a /// Ugt1a6b /// Ugt1a7c /// Ugt1a9	UDP glucuronosyltransferase 1 family, polypeptide A1 /// UDP glycosyltransferase 1 family, polypeptide A10 /// UDP glucuronosyltransferase 1 family, polypeptide A2 /// UDP glucuronosyltransferase 1 family, polypeptide A5 /// UDP glucuronosyltransferase 1 family, polypeptide A6A /// UDP glucuronosyltransferase 1 family, polypeptide A6B /// UDP glucuronosyltransferase 1 family, polypeptide A7C /// …	22236 /// 394430 /// 394432 /// 394433 /// 394434 /// 394435 /// 394436 /// 94284	chr1 D /// chr1 D|1 51.7 cM	0007584 // response to nutrient // inferred from electronic annotation /// 0008152 // metabolic process // inferred from electronic annotation /// 0018879 // biphenyl metabolic process // inferred from electronic annotation /// 0019585 // glucuronate metabolic process // inferred from direct assay /// 0019585 // glucuronate metabolic process // not recorded /// 0042493 // response to drug // infe…	Irinotecan_pathway_PharmGKB // GenMAPP
1422093_at	345.659	361.709	232.321	412.595	394.409	326.17	-0.00314117	0.0666347	-0.486155	0.713925	0.280354	0.211546	0.0189987	1.01326	0	NM_009522	Wnt3a	wingless-related MMTV integration site 3A	22416	chr11 B1.3|11 32.0 cM	0001701 // in utero embryonic development // inferred from mutant phenotype /// 0001756 // somitogenesis // inferred from mutant phenotype /// 0001947 // heart looping // inferred from mutant phenotype /// 0007165 // signal transduction // traceable author statement /// 0007223 // Wnt receptor signaling pathway, calcium modulating pathway // inferred from electronic annotation /// 0007267 // cell…	Wnt_Signaling // GenMAPP
1450381_a_at	200.487	175.679	235.949	154.409	136.527	187.906	-0.000368687	-0.173745	0.322049	1.25011	-0.353834	-0.535215	0.0098943	1.00688	2	NM_009744	Bcl6	B-cell leukemia/lymphoma 6	12053	chr16 B1|16 13.9 cM	0000060 // protein import into nucleus, translocation // inferred from electronic annotation /// 0000122 // negative regulation of transcription from RNA polymerase II promoter // inferred from direct assay /// 0000122 // negative regulation of transcription from RNA polymerase II promoter // inferred from genetic interaction /// 0000122 // negative regulation of transcription from RNA polymerase…
1423491_at	187.632	190.556	148.514	215.205	200.554	175.21	-0.000611002	0.0405703	-0.251187	0.840205	0.221499	0.116092	0.00364852	1.00253	0	NM_020593 /// NM_212433	Fbxo3	F-box protein 3	57443	chr2 E2	0019941 // modification-dependent protein catabolic process // inferred from electronic annotation
1448786_at	1155.52	1120.95	1740.2	783.571	990.127	1069.95	-0.00581197	-0.0247888	0.67827	1.60022	-0.537172	-0.203329	-0.00723207	0.995	0	NM_025806 /// XM_001473518	LOC100045163 /// Plbd1	similar to RIKEN cDNA 1100001H23 gene /// phospholipase B domain containing 1	100045163 /// 66857	chr6 G1	0016042 // lipid catabolic process // inferred from electronic annotation
1448477_at	607.592	637.423	442.444	687.824	667.744	560.867	-0.00075742	0.0763775	-0.374943	0.771136	0.203021	0.156353	-0.0124403	0.991414	2	NM_021528	Chst12	carbohydrate sulfotransferase 12	59031	chr5 G2	0005975 // carbohydrate metabolic process // inferred from electronic annotation /// 0016051 // carbohydrate biosynthetic process // inferred from electronic annotation /// 0030206 // chondroitin sulfate biosynthetic process // inferred from sequence or structural similarity /// 0030208 // dermatan sulfate biosynthetic process // inferred from sequence or structural similarity
1450729_at	3781.87	4143.09	2376.33	4683.11	5076.94	3480.96	-0.00241403	0.146435	-0.586768	0.665833	0.32704	0.444647	-0.0168087	0.988417	3	NM_011828	Hs2st1	heparan sulfate 2-O-sulfotransferase 1	23908	chr3 H2	0015014 // heparan sulfate proteoglycan biosynthetic process, polysaccharide chain biosynthetic process // inferred from mutant phenotype /// 0030202 // heparin metabolic process // inferred from mutant phenotype
1419869_s_at	2237.99	1964.09	2499.6	1964.17	1908.14	2050.25	-0.00232728	-0.169572	0.246699	1.18649	-0.163053	-0.209463	-0.0232409	0.98402	3	NM_133808	Hdlbp	high density lipoprotein (HDL) binding protein	110611	chr1 D|1 55.3 cM	0006629 // lipid metabolic process // inferred from electronic annotation /// 0006810 // transport // inferred from electronic annotation /// 0006869 // lipid transport // inferred from electronic annotation /// 0008202 // steroid metabolic process // inferred from electronic annotation /// 0008203 // cholesterol metabolic process // inferred from electronic annotation
1424175_at	1482.82	1412.6	514.701	2589.86	2577.22	1355.29	-0.0593202	-0.0513818	-1.44814	0.366494	0.823504	0.816792	-0.0271108	0.981384	3	NM_017376 /// NM_153484	Tef	thyrotroph embryonic factor	21685	chr15 E1|15 46.7 cM	0006350 // transcription // inferred from electronic annotation /// 0006355 // regulation of transcription, DNA-dependent // inferred from electronic annotation /// 0045944 // positive regulation of transcription from RNA polymerase II promoter // inferred from direct assay /// 0048511 // rhythmic process // inferred from electronic annotation
1416168_at	887.814	818.673	2561.14	621.936	654.389	809.339	-0.0161892	-0.117078	1.60758	3.04741	-0.540643	-0.426521	-0.0357472	0.975526	0	NM_011340	Serpinf1	serine (or cysteine) peptidase inhibitor, clade F, member 1	20317	chr11 B5	0016525 // negative regulation of angiogenesis // inferred from direct assay /// 0016525 // negative regulation of angiogenesis // inferred from electronic annotation /// 0050769 // positive regulation of neurogenesis // inferred from sequence or structural similarity /// 0050769 // positive regulation of neurogenesis // inferred from electronic annotation
1421375_a_at	5289.86	5203.22	2966.24	7004.82	6523.42	4802.06	-0.00303274	-0.00645442	-0.752566	0.593547	0.423566	0.319256	-0.0380177	0.973992	2	NM_011313	S100a6	S100 calcium binding protein A6 (calcyclin)	20200	chr3 F1-F2|3 43.6 cM	0007049 // cell cycle // inferred from electronic annotation /// 0008283 // cell proliferation // inferred from electronic annotation	Prostaglandin_synthesis_regulation // GenMAPP
1426753_at	419.349	368.822	554.773	360.422	327.097	379.054	-0.000449101	-0.167694	0.487212	1.40173	-0.195062	-0.342942	-0.0444716	0.969645	2	NM_001130184 /// NM_001130185 /// NM_001130186 /// NM_172303	Phf17	PHD finger protein 17	269424	chr3 B	0006350 // transcription // inferred from electronic annotation /// 0006355 // regulation of transcription, DNA-dependent // inferred from electronic annotation /// 0006915 // apoptosis // inferred from electronic annotation
1419434_at	115.792	82.5702	175.08	93.2695	88.6554	104.505	-0.00160355	-0.489329	0.680477	1.60267	-0.288068	-0.3663	-0.044721	0.969477	0	NM_130451	Slc2a10	solute carrier family 2 (facilitated glucose transporter), member 10	170441	chr2 H3|2 98.0 cM	0006810 // transport // inferred from electronic annotation /// 0008643 // carbohydrate transport // inferred from electronic annotation /// 0015758 // glucose transport // not recorded /// 0055085 // transmembrane transport // inferred from electronic annotation
1450922_a_at	235.992	311.22	125.804	349.732	357.646	212.887	-0.00422636	0.41198	-0.822569	0.565434	0.581742	0.618599	-0.0477967	0.967413	0	NM_009367	Tgfb2	transforming growth factor, beta 2	21808	chr1 H5|1 101.5 cM	0000902 // cell morphogenesis // inferred from sequence or structural similarity /// 0000902 // cell morphogenesis // inferred from electronic annotation /// 0001501 // skeletal system development // inferred from mutant phenotype /// 0001502 // cartilage condensation // inferred from genetic interaction /// 0001568 // blood vessel development // inferred from mutant phenotype /// 0001654 // eye …
1455293_at	264.617	253.056	351.84	188.143	177.257	238.474	-0.00886542	-0.0452708	0.495127	1.40944	-0.47387	-0.560042	-0.0481752	0.967159	3	NM_001039522	Leo1	Leo1, Paf1/RNA polymerase II complex component, homolog (S. cerevisiae)	235497	chr9 D	0006350 // transcription // inferred from electronic annotation /// 0006355 // regulation of transcription, DNA-dependent // inferred from electronic annotation
1450872_s_at	1333.95	1337.96	1620.33	1190.41	1179.2	1202.6	-0.000957049	0.0219574	0.366322	1.28906	-0.140768	-0.159552	-0.0483355	0.967051	1	NM_001111100 /// NM_021460	Lipa	lysosomal acid lipase A	16889	chr19 C1	0000902 // cell morphogenesis // inferred from mutant phenotype /// 0001816 // cytokine production // inferred from mutant phenotype /// 0006629 // lipid metabolic process // inferred from electronic annotation /// 0006954 // inflammatory response // inferred from mutant phenotype /// 0008283 // cell proliferation // inferred from mutant phenotype /// 0016042 // lipid catabolic process // inferre…
1425019_at	350.895	278.801	473.888	249.935	403.675	316.583	-0.000427013	-0.322394	0.516022	1.43001	-0.468466	0.220779	-0.0489679	0.966628	0	NM_145441	Ubxn2a	UBX domain protein 2A	217379	chr12 A1.1
1437309_a_at	1837.72	1820.84	1522.04	2047.13	2083.37	1647.98	-3.70025e-05	0.00499768	-0.186259	0.878882	0.180569	0.200321	-0.0542581	0.96309	0	NM_026653	Rpa1	replication protein A1	68275	chr11 B5|11 44.0 cM	0000724 // double-strand break repair via homologous recombination // inferred from mutant phenotype /// 0001701 // in utero embryonic development // inferred from mutant phenotype /// 0006260 // DNA replication // inferred from electronic annotation /// 0007126 // meiosis // inferred from direct assay /// 0008284 // positive regulation of cell proliferation // inferred from mutant phenotype /// …	DNA_replication_Reactome // GenMAPP /// G1_to_S_cell_cycle_Reactome // GenMAPP
1431059_x_at	142.387	121.637	100.423	167.918	150.516	127.689	-0.00266774	-0.268994	-0.419779	0.747539	0.262108	0.0973817	-0.056889	0.961335	0	NM_028242	Htatsf1	HIV TAT specific factor 1	72459	chrX A4	0006350 // transcription // inferred from electronic annotation /// 0006355 // regulation of transcription, DNA-dependent // inferred from electronic annotation
1437284_at	2153.01	2092.46	2352.65	1890.86	1964.36	1928.6	-0.000350393	-0.0215873	0.21466	1.16043	-0.16314	-0.112986	-0.0576696	0.960815	0	NM_021457	Fzd1	frizzled homolog 1 (Drosophila)	14362	chr5 A1|5 5.0 cM	0007165 // signal transduction // inferred from electronic annotation /// 0007166 // cell surface receptor linked signal transduction // inferred from electronic annotation /// 0007186 // G-protein coupled receptor protein signaling pathway // inferred from electronic annotation /// 0007267 // cell-cell signaling // inferred from direct assay /// 0007275 // multicellular organismal development //…	GPCRDB_Other // GenMAPP /// Wnt_Signaling // GenMAPP
1417378_at	2658.87	2557.11	1570.17	3299.97	2880.75	2378.49	-0.00019301	-0.0369859	-0.674786	0.626425	0.330553	0.135552	-0.0583512	0.960361	0	NM_001025600 /// NM_018770 /// NM_207675 /// NM_207676	Cadm1	cell adhesion molecule 1	54725	chr9 B-C	0006915 // apoptosis // inferred from electronic annotation /// 0006955 // immune response // inferred from electronic annotation /// 0007049 // cell cycle // inferred from electronic annotation /// 0007155 // cell adhesion // inferred from direct assay /// 0007155 // cell adhesion // inferred from electronic annotation /// 0007156 // homophilic cell adhesion // inferred from direct assay /// 000…
1442819_at	60.5018	53.6166	232.197	42.1711	48.3782	53.8745	-0.0150219	-0.181556	2.0287	4.08038	-0.500036	-0.300583	-0.064272	0.956428	0	NM_183163	Rhbdl2	rhomboid, veinlet-like 2 (Drosophila)	230726	chr4 D2.2	0007165 // signal transduction // inferred from electronic annotation
1460172_at	770.456	779.665	622.118	912.397	877.199	683.946	-0.000824328	0.0238975	-0.223903	0.856246	0.268536	0.206956	-0.0689228	0.95335	3	NM_025670	5730403B10Rik	RIKEN cDNA 5730403B10 gene	66626	chr16 A1|16 2.7 cM	0006915 // apoptosis // not recorded /// 0006917 // induction of apoptosis // not recorded /// 0006917 // induction of apoptosis // inferred from electronic annotation /// 0033209 // tumor necrosis factor-mediated signaling pathway // not recorded /// 0033209 // tumor necrosis factor-mediated signaling pathway // inferred from electronic annotation /// 0042771 // DNA damage response, signal trans…
1418673_at	154.141	185.191	66.9307	246.186	242.501	136.454	-0.0124611	0.263096	-1.11901	0.46041	0.69815	0.672589	-0.0755247	0.948997	0	NM_011415	Snai2	snail homolog 2 (Drosophila)	20583	chr16 A1|16 9.4 cM	0006350 // transcription // inferred from electronic annotation /// 0006355 // regulation of transcription, DNA-dependent // inferred from electronic annotation /// 0007275 // multicellular organismal development // inferred from electronic annotation /// 0009314 // response to radiation // inferred from direct assay /// 0009314 // response to radiation // inferred from mutant phenotype /// 00458…
1440162_x_at	41.0915	40.2799	88.9583	39.4062	49.8189	36.5376	-0.00722813	-0.0131182	1.19345	2.28699	-0.0445692	0.255177	-0.076553	0.948321	0		A630043P06	hypothetical protein A630043P06	328187	chr13 A1
1418662_at	124.706	139.357	170.635	100.021	105.081	110.162	-4.34925e-05	0.179142	0.537707	1.45166	-0.300773	-0.227963	-0.0795671	0.946342	0	NM_025617	2210012G02Rik	RIKEN cDNA 2210012G02 gene	66526	chr4 C7	0006350 // transcription // inferred from electronic annotation /// 0006354 // RNA elongation // inferred from electronic annotation /// 0006355 // regulation of transcription, DNA-dependent // inferred from electronic annotation
1453285_at	470.344	499.401	352.705	599.175	643.788	414.741	-0.00106369	0.0907239	-0.329356	0.795892	0.374284	0.472462	-0.0804578	0.945758	3	NM_025915	Tmem88	transmembrane protein 88	67020	chr11 B4
1454723_at	478.462	451.93	330.199	581.348	566.716	420.776	-0.00210764	-0.0645901	-0.452073	0.730992	0.304755	0.263766	-0.0836322	0.943679	0	XM_193728 /// XM_911881	1110033M05Rik	RIKEN cDNA 1110033M05 gene	68675	chr13 C1
1428116_a_at	6977.88	7382.01	8900.11	4298.24	5074.64	6044.87	-0.000950438	0.0983245	0.436944	1.35373	-0.675027	-0.438587	-0.103906	0.93051	1	NM_009342 /// XM_001475602 /// XM_001475617 /// XM_001475631 /// XM_001475648 /// XM_001481167 /// XM_001481168	Dynlt1 /// Dynlt1d /// ENSMUSG00000056252	dynein light chain Tctex-type 1 /// dynein light chain Tctex-type 1D /// predicted gene, ENSMUSG00000056252	100040603 /// 100043890 /// 21648	chr17 A1|17 /// chr17 A1|17 3.1 cM /// chr6 G1	0007017 // microtubule-based process // inferred from direct assay
1459556_at	41.2994	36.2262	59.7431	32.4352	36.1136	35.7097	-0.00736428	-0.182354	0.611847	1.52821	-0.324941	-0.180611	-0.118774	0.92097	2
1415948_at	1965.03	1887.8	2155.77	1476.09	1407.89	1681.86	-0.00272367	-0.0413233	0.218677	1.16367	-0.388979	-0.464953	-0.121815	0.919031	3	NM_011804	Creg1	cellular repressor of E1A-stimulated genes 1	433375	chr1 H2.3	0006355 // regulation of transcription, DNA-dependent // inferred from direct assay /// 0040008 // regulation of growth // inferred from electronic annotation
1421682_a_at	43.1683	43.309	32.611	55.1376	57.0474	36.9175	-0.000316107	0.0164018	-0.320475	0.800806	0.37742	0.419247	-0.124571	0.917277	3	NM_001123367 /// NM_001123368 /// NM_011560 /// NM_198104 /// XM_001477686 /// XM_001477697 /// XM_001477804 /// XM_001477817	100041586 /// 100041639 /// Tcte3	predicted gene, 100041586 /// predicted gene, 100041639 /// t-complex-associated testis expressed 3	100041586 /// 100041639 /// 21647	chr17 A2 /// chr17 A2|17 /// chr17 A2|17 8.16 cM	0007018 // microtubule-based movement // inferred from direct assay
1436343_at	158.586	173.1	182.175	135.389	123.987	135.42	-0.000522316	0.086876	0.286846	1.21997	-0.208626	-0.337915	-0.125423	0.916735	0	NM_145979	Chd4	chromodomain helicase DNA binding protein 4	107932	chr6 F3|6 58.4 cM	0006333 // chromatin assembly or disassembly // inferred from electronic annotation /// 0006350 // transcription // inferred from electronic annotation /// 0006355 // regulation of transcription, DNA-dependent // inferred from electronic annotation /// 0016568 // chromatin modification // inferred from electronic annotation /// 0045449 // regulation of transcription // inferred from electronic an…
1419209_at	369.501	163.469	970.165	72.2776	70.6173	313.937	-0.0176497	-1.24529	1.4707	2.77157	-2.38495	-2.37082	-0.133514	0.911608	2	NM_008176	Cxcl1	chemokine (C-X-C motif) ligand 1	14825	chr5 E-F|5 51.0 cM	0006954 // inflammatory response // inferred from electronic annotation /// 0006955 // immune response // inferred from electronic annotation
1417385_at	573.411	467.068	748.951	475.637	556.11	487.93	-0.000292197	-0.277204	0.472265	1.38729	-0.24919	-0.0249492	-0.134229	0.911156	3	NM_008942	Npepps	aminopeptidase puromycin sensitive	19155	chr11 D|11 56.0 cM	0006508 // proteolysis // inferred from electronic annotation
1439292_at	78.6298	82.1604	94.3893	67.2529	77.7812	66.1247	-0.00774478	0.0757807	0.348561	1.27329	-0.203067	0.00167957	-0.14775	0.902657	0
1452870_at	291.961	272.37	208.754	313.304	299.108	244.811	-0.00026017	-0.0853347	-0.39736	0.759246	0.126513	0.0504752	-0.151561	0.900276	2	NM_001042558 /// NM_009684	Apaf1	apoptotic peptidase activating factor 1	11783	chr10 C3-D1|10 48.0 cM	0001843 // neural tube closure // inferred from mutant phenotype /// 0006309 // DNA fragmentation involved in apoptosis // inferred from genetic interaction /// 0006508 // proteolysis // inferred from electronic annotation /// 0006915 // apoptosis // inferred from electronic annotation /// 0006917 // induction of apoptosis // inferred from electronic annotation /// 0006919 // activation of caspas…	Apoptosis // GenMAPP /// Apoptosis_GenMAPP // GenMAPP /// Apoptosis_KEGG // GenMAPP
1434763_at	111.367	93.7127	148.216	92.5793	108.183	92.7602	-0.00483128	-0.274449	0.491996	1.40639	-0.242369	-0.0208391	-0.159876	0.895102	0	NM_178751	Orai2	ORAI calcium release-activated calcium modulator 2	269717	chr5 G2
1456412_a_at	1163.61	1001.81	740.176	1341.61	1228.32	969.085	-0.00183177	-0.19864	-0.571405	0.672961	0.229509	0.0965395	-0.160879	0.89448	0	NM_008916	Inpp5k	inositol polyphosphate 5-phosphatase K	19062	chr11 B5|11 44.12 cM
1453684_s_at	773.523	643.394	1126.78	542.947	584.601	638.548	-0.00121868	-0.267351	0.616895	1.53357	-0.488686	-0.388378	-0.174789	0.885897	2	NM_026934	Zc3h15	zinc finger CCCH-type containing 15	69082	chr2 E1	0019221 // cytokine-mediated signaling pathway // inferred from direct assay
1449575_a_at	8892.42	8727.37	9518.91	7601.48	8005.25	7301.71	-0.000935563	-0.00726156	0.185544	1.13725	-0.200776	-0.131193	-0.181218	0.881958	0	NM_013541	Gstp1	glutathione S-transferase, pi 1	14870	chr19 A|19 0.0 cM	0006749 // glutathione metabolic process // inferred from direct assay /// 0008152 // metabolic process // inferred from electronic annotation	Circadian_Exercise // GenMAPP
1443939_at	306.485	289.782	207.823	491.891	535.272	251.476	-0.00806267	-0.0671247	-0.474294	0.719819	0.70668	0.816735	-0.185828	0.879144	0	NM_001085549 /// XM_981216	OTTMUSG00000008561	predicted gene, OTTMUSG00000008561	666048	chr4 D1|4
1455434_a_at	1118.35	972.928	813.869	1243.22	1075.88	907.583	-0.000233147	-0.198074	-0.372095	0.77266	0.177791	-0.0361218	-0.198783	0.871285	2	NM_008477	Ktn1	kinectin 1	16709	chr14 C2	0007018 // microtubule-based movement // traceable author statement
1453113_at	371.59	375.661	300.717	400.671	426.222	301.206	-3.9556e-05	0.0352683	-0.218278	0.859591	0.133962	0.218327	-0.199623	0.870778	3	NM_001159636 /// NM_028118	Wdsub1	WD repeat, SAM and U-box domain containing 1	72137	chr2 C3	0016567 // protein ubiquitination // inferred from electronic annotation
1436320_at	1750.91	1870.08	2384.52	1288.17	1350.72	1405.98	-0.00102682	0.100055	0.521426	1.43537	-0.417879	-0.35417	-0.213649	0.862353	0
1449187_at	934.736	936.273	524.073	1095.31	1258.28	748.652	-0.000312551	0.0125324	-0.75004	0.594587	0.252781	0.449007	-0.218098	0.859698	0	NM_008808	Pdgfa	platelet derived growth factor, alpha	18590	chr5 G2|5 82.0 cM	0001525 // angiogenesis // inferred from direct assay /// 0001666 // response to hypoxia // inferred from electronic annotation /// 0001942 // hair follicle development // inferred from mutant phenotype /// 0002053 // positive regulation of mesenchymal cell proliferation // inferred from mutant phenotype /// 0007179 // transforming growth factor beta receptor signaling pathway // inferred from el…
1436545_at	799.821	741.838	1120.51	598.181	548.426	640.309	-0.005742	-0.0972072	0.56325	1.47759	-0.397485	-0.528389	-0.219525	0.858848	1	NM_172442	Dtx4	deltex 4 homolog (Drosophila)	207521	chr19 A	0007219 // Notch signaling pathway // inferred from electronic annotation
1434740_at	1431.9	1449.18	929.712	1417.57	1576.74	1143.43	-0.000107323	0.036621	-0.536051	0.689656	0.00976873	0.159391	-0.221055	0.857938	0	NM_153790	Scarf2	scavenger receptor class F, member 2	224024	chr16 A3	0007155 // cell adhesion // inferred from electronic annotation /// 0007157 // heterophilic cell adhesion // inferred from direct assay
1424522_at	891.959	901.077	1477.18	633.495	575.707	715.7	-0.00132927	0.0341078	0.812559	1.75632	-0.478211	-0.612923	-0.223891	0.856253	2	NM_144835	Heatr1	HEAT repeat containing 1	217995	chr13 A1
1450747_at	390.414	346.52	446.185	322.863	369.404	310.946	-0.000349748	-0.15391	0.277853	1.21239	-0.254282	-0.0596691	-0.224977	0.855609	0	NM_001110305 /// NM_001110306 /// NM_001110307 /// NM_016679	Keap1	kelch-like ECH-associated protein 1	50868	chr9 A3	0001701 // in utero embryonic development // inferred from mutant phenotype /// 0006350 // transcription // inferred from electronic annotation /// 0006355 // regulation of transcription, DNA-dependent // inferred from electronic annotation /// 0045449 // regulation of transcription // inferred from mutant phenotype /// 0045604 // regulation of epidermal cell differentiation // inferred from muta…
1453473_a_at	4041.19	4060.93	5108.69	2305.1	2845.22	3207.93	-0.00171936	0.0259067	0.424104	1.34174	-0.787207	-0.485831	-0.231382	0.851818	0	NM_009342 /// XM_001475602 /// XM_001475617 /// XM_001475631 /// XM_001475648 /// XM_001481167 /// XM_001481168	Dynlt1 /// Dynlt1d /// ENSMUSG00000056252	dynein light chain Tctex-type 1 /// dynein light chain Tctex-type 1D /// predicted gene, ENSMUSG00000056252	100040603 /// 100043890 /// 21648	chr17 A1|17 /// chr17 A1|17 3.1 cM /// chr6 G1	0007017 // microtubule-based process // inferred from direct assay
1437760_at	142.802	119.503	263.315	112.761	117.573	113.645	-0.00455699	-0.246097	0.957662	1.94216	-0.315163	-0.263073	-0.239125	0.847259	0	NM_172693	Galnt12	UDP-N-acetyl-alpha-D-galactosamine:polypeptide N-acetylgalactosaminyltransferase 12	230145	chr4 B1
1426904_s_at	1108.57	1041.38	1091.45	782.307	885.273	872.688	-0.00148602	-0.0701647	0.0614484	1.04351	-0.477787	-0.304991	-0.241283	0.845993	0	NM_024181 /// XR_033124	Dnajc10 /// LOC100047007	DnaJ (Hsp40) homolog, subfamily C, member 10 /// similar to DnaJ (Hsp40) homolog, subfamily C, member 10	100047007 /// 66861	chr2 D	0006457 // protein folding // inferred from electronic annotation /// 0045454 // cell redox homeostasis // inferred from electronic annotation
1426905_a_at	1507.79	1390.01	1568.34	1112.4	1172.68	1178.34	-0.000242461	-0.102358	0.14299	1.10419	-0.414254	-0.342412	-0.252949	0.839179	2	NM_024181 /// XR_033124	Dnajc10 /// LOC100047007	DnaJ (Hsp40) homolog, subfamily C, member 10 /// similar to DnaJ (Hsp40) homolog, subfamily C, member 10	100047007 /// 66861	chr2 D	0006457 // protein folding // inferred from electronic annotation /// 0045454 // cell redox homeostasis // inferred from electronic annotation
1421529_a_at	1079.11	1029.66	1381.36	563.074	603.52	838.194	-0.000354672	-0.0497984	0.44322	1.35964	-0.913647	-0.818825	-0.260871	0.834584	2	NM_001042513 /// NM_001042514 /// NM_001042523 /// NM_015762	Txnrd1	thioredoxin reductase 1	50493	chr10 C1	0001707 // mesoderm formation // inferred from mutant phenotype /// 0006979 // response to oxidative stress // inferred from electronic annotation /// 0007369 // gastrulation // inferred from mutant phenotype /// 0008283 // cell proliferation // inferred from mutant phenotype /// 0042744 // hydrogen peroxide catabolic process // inferred from electronic annotation /// 0045454 // cell redox homeos…
1448829_at	518.557	435.964	292.604	607.149	553.164	398.906	-0.00105056	-0.248657	-0.740579	0.598499	0.249009	0.105841	-0.275768	0.82601	2	NM_025695	Smc6	structural maintenance of chromosomes 6	67241	chr12 A2	0006281 // DNA repair // inferred from electronic annotation /// 0006310 // DNA recombination // inferred from electronic annotation /// 0006974 // response to DNA damage stimulus // inferred from electronic annotation
1424296_at	2875.08	2556.08	3541.63	1223.95	1325.68	2208.63	-0.00115482	-0.152326	0.38394	1.3049	-1.21389	-1.09925	-0.278647	0.824364	0	NM_010295	Gclc	glutamate-cysteine ligase, catalytic subunit	14629	chr9 D-E|9 42.0 cM	0006534 // cysteine metabolic process // inferred from electronic annotation /// 0006534 // cysteine metabolic process // inferred from sequence or structural similarity /// 0006536 // glutamate metabolic process // inferred from electronic annotation /// 0006536 // glutamate metabolic process // inferred from sequence or structural similarity /// 0006749 // glutathione metabolic process // infer…
1427473_at	68.9941	58.7464	67.2391	50.3782	51.4945	52.4799	-0.000752858	-0.212084	0.0499174	1.03521	-0.428255	-0.403081	-0.29122	0.817211	2	NM_010359	Gstm3	glutathione S-transferase, mu 3	14864		0008152 // metabolic process // inferred from electronic annotation	Circadian_Exercise // GenMAPP
1426447_at	419.411	409.695	459.522	327.168	368.246	315.653	-0.000669257	-0.0166776	0.218084	1.16319	-0.333608	-0.169398	-0.309855	0.806723	2	NM_027091	Nup35	nucleoporin 35	69482	chr2 C3	0006810 // transport // inferred from electronic annotation /// 0015031 // protein transport // inferred from electronic annotation /// 0051028 // mRNA transport // inferred from electronic annotation /// 0065002 // intracellular protein transmembrane transport // inferred from electronic annotation
1434290_at	231.085	213.452	151.715	269.164	242.087	173.44	-4.71313e-05	-0.0952562	-0.522565	0.696133	0.244978	0.0825097	-0.310976	0.806096	0	NM_172662	Gtdc1	glycosyltransferase-like domain containing 1	227835	chr2 B	0009058 // biosynthetic process // inferred from electronic annotation
1441963_at	236.458	222.592	135.564	261.41	259.009	176.634	-0.000187521	-0.07487	-0.718415	0.607765	0.168605	0.15163	-0.318346	0.801989	3	NM_197945	RP23-100C5.8	ProSAPiP1 protein	241638	chr2 F1
1423266_at	375.723	383.895	260.802	543.432	481.188	280.135	-0.0015198	0.0422436	-0.447483	0.733321	0.556951	0.374861	-0.323809	0.798958	3	NM_025582	2810405K02Rik	RIKEN cDNA 2810405K02 gene	66469	chr4 E2
1435338_at	886.993	969.337	417.468	1180.84	1271.3	652.18	-0.00122312	0.146979	-1.01276	0.495598	0.43254	0.538787	-0.340941	0.789526	3	NM_009873	Cdk6	cyclin-dependent kinase 6	12571	chr5 A2-A3|5 1.0 cM	0006468 // protein amino acid phosphorylation // inferred from electronic annotation /// 0007049 // cell cycle // inferred from electronic annotation /// 0030097 // hemopoiesis // inferred from mutant phenotype /// 0051301 // cell division // inferred from electronic annotation
1447685_x_at	619.979	580.56	374.112	746.072	627.262	450.688	-0.00250124	-0.0778936	-0.642819	0.64046	0.290225	0.0346142	-0.357516	0.780507	0	NM_011809	Ets2	E26 avian leukemia oncogene 2, 3' domain	23872	chr16 C3-qter|16 69.6 cM	0006355 // regulation of transcription, DNA-dependent // inferred from electronic annotation	Smooth_muscle_contraction // GenMAPP
1416868_at	1037.37	1100.2	453.149	1287.62	1409.28	752.186	-0.0089527	0.102263	-1.12079	0.45984	0.336444	0.459279	-0.361644	0.778277	1	NM_007671	Cdkn2c	cyclin-dependent kinase inhibitor 2C (p18, inhibits CDK4)	12580	chr4 C7|4 24.7 cM	0000079 // regulation of cyclin-dependent protein kinase activity // inferred from electronic annotation /// 0000082 // G1/S transition of mitotic cell cycle // inferred from electronic annotation /// 0006917 // induction of apoptosis // inferred from electronic annotation /// 0007049 // cell cycle // inferred from electronic annotation /// 0007050 // cell cycle arrest // inferred from electronic…	G1_to_S_cell_cycle_Reactome // GenMAPP
1418858_at	2115.96	2130.43	4216.8	644.16	837.548	1516.34	-0.00452215	0.0269769	1.08066	2.11501	-1.69297	-1.31575	-0.382065	0.767339	0	NM_023617	Aox3	aldehyde oxidase 3	71724	chr1 C1.3|1 23.2 cM	0055114 // oxidation reduction // inferred from electronic annotation
1427912_at	592.568	570.467	781.967	453.893	467.9	421.425	-0.00111746	-0.0401046	0.483122	1.39777	-0.367493	-0.320825	-0.390924	0.762641	2	NM_173047	Cbr3	carbonyl reductase 3	109857	chr16 C4|16 67.2 cM	0008152 // metabolic process // inferred from electronic annotation /// 0055114 // oxidation reduction // inferred from electronic annotation
1460203_at	1303.8	1161.54	1152.25	1171.39	1060.21	914.046	-0.00120939	-0.149154	-0.0917706	0.93837	-0.130371	-0.279089	-0.409412	0.75293	0	NM_010585	Itpr1	inositol 1,4,5-triphosphate receptor 1	16438	chr6 E1-E2|6 48.0 cM	0001666 // response to hypoxia // inferred from direct assay /// 0006810 // transport // inferred from electronic annotation /// 0006811 // ion transport // inferred from electronic annotation /// 0006816 // calcium ion transport // inferred from direct assay /// 0006816 // calcium ion transport // inferred from electronic annotation /// 0009791 // post-embryonic development // inferred from muta…	Calcium_regulation_in_cardiac_cells // GenMAPP /// G_Protein_Signaling // GenMAPP /// Smooth_muscle_contraction // GenMAPP
1421002_at	349.325	290.955	132.091	441.299	426.231	244.361	-8.9199e-05	-0.249697	-1.32023	0.400472	0.352279	0.30716	-0.414876	0.750084	2	NM_011923	Angptl2	angiopoietin-like 2	26360	chr2 B	0007165 // signal transduction // inferred from electronic annotation
1457157_at	60.1938	53.695	83.8097	52.9696	52.3269	41.6145	-0.000353967	-0.157658	0.562699	1.47703	-0.179411	-0.198775	-0.431084	0.741704	0	NM_183191	Plch1	phospholipase C, eta 1	269437	chr3 E1	0006629 // lipid metabolic process // inferred from electronic annotation /// 0007165 // signal transduction // inferred from electronic annotation /// 0007242 // intracellular signaling cascade // inferred from electronic annotation /// 0016042 // lipid catabolic process // inferred from electronic annotation /// 0048015 // phosphoinositide-mediated signaling // not recorded
1440984_at	109.971	74.7003	140.769	79.3024	94.9054	76.605	-0.011274	-0.56684	0.440563	1.35713	-0.452848	-0.201239	-0.438906	0.737694	0	NM_001001182	Baz2b	bromodomain adjacent to zinc finger domain, 2B	407823	chr2 C1.1
1458341_x_at	1719.35	1598.84	655.791	2342.42	1916.5	1179.91	-0.013388	-0.0876824	-1.31113	0.403005	0.466529	0.175351	-0.441665	0.736284	0
1427877_at	1272.44	979.996	1611.21	768.643	913.779	870.013	-0.000746169	-0.376029	0.424885	1.34247	-0.703869	-0.459813	-0.446645	0.733747	3	NM_026934	Zc3h15	zinc finger CCCH-type containing 15	69082	chr2 E1	0019221 // cytokine-mediated signaling pathway // inferred from direct assay
1426477_at	853.541	741.315	739.751	773.87	781.511	582.334	-0.000752316	-0.188007	-0.120554	0.919835	-0.11681	-0.107773	-0.448717	0.732694	3	NM_145452	Rasa1	RAS p21 protein activator 1	218397	chr13 C3	0001570 // vasculogenesis // inferred from mutant phenotype /// 0001570 // vasculogenesis // inferred from sequence or structural similarity /// 0001953 // negative regulation of cell-matrix adhesion // inferred from electronic annotation /// 0001953 // negative regulation of cell-matrix adhesion // inferred from sequence or structural similarity /// 0007162 // negative regulation of cell adhesio…
1434714_at	545.381	481.724	698.775	421.983	426.935	370.951	-0.0042148	-0.159518	0.439941	1.35655	-0.345739	-0.337735	-0.453147	0.730448	0	NM_026184	Ero1lb	ERO1-like beta (S. cerevisiae)	67475	chr13 A1	0006467 // protein thiol-disulfide exchange // inferred from electronic annotation /// 0006810 // transport // inferred from electronic annotation /// 0022900 // electron transport chain // inferred from electronic annotation /// 0055114 // oxidation reduction // inferred from electronic annotation
1439566_at	108.878	63.9551	185.943	47.2448	81.8586	74.3285	-0.0280356	-0.789962	0.85324	1.80655	-1.1881	-0.400479	-0.457539	0.728227	3	NM_183183	Gprin3	GPRIN family member 3	243385	chr6 B3
1449297_at	261.143	298.208	110.77	308.81	412.136	173.637	-0.00214306	0.184207	-1.15259	0.449818	0.263989	0.676387	-0.488449	0.712791	2	NM_009808	Casp12	caspase 12	12364	chr9 A1|9 1.11 cM	0006508 // proteolysis // inferred from reviewed computational analysis /// 0006508 // proteolysis // inferred from electronic annotation /// 0006915 // apoptosis // inferred from direct assay /// 0006915 // apoptosis // inferred from electronic annotation /// 0006917 // induction of apoptosis // inferred from reviewed computational analysis /// 0006926 // virus-infected cell apoptosis // inferre…
1438641_x_at	119.158	140.532	70.1454	178.148	140.251	79.1519	-0.000487325	0.256995	-0.692573	0.618749	0.605104	0.255446	-0.490473	0.711792	3	NM_001146347 /// NM_026884 /// NM_029978 /// XM_001480258 /// XM_924242	Fam57b	family with sequence similarity 57, member B	68952	chr7 F4
1447643_x_at	796.93	941.797	314.423	1171.01	1180.67	529.781	-0.00141604	0.258971	-1.26282	0.41673	0.576936	0.585521	-0.493725	0.710189	0	NM_011415	Snai2	snail homolog 2 (Drosophila)	20583	chr16 A1|16 9.4 cM	0006350 // transcription // inferred from electronic annotation /// 0006355 // regulation of transcription, DNA-dependent // inferred from electronic annotation /// 0007275 // multicellular organismal development // inferred from electronic annotation /// 0009314 // response to radiation // inferred from direct assay /// 0009314 // response to radiation // inferred from mutant phenotype /// 00458…
1424308_at	594.126	555.129	145.373	796.588	797.415	392.92	-0.011	-0.0785819	-1.94886	0.25902	0.449034	0.446195	-0.497822	0.708175	0	NM_053195	Slc24a3	solute carrier family 24 (sodium/potassium/calcium exchanger), member 3	94249	chr2 H1	0006810 // transport // inferred from electronic annotation /// 0006811 // ion transport // inferred from electronic annotation /// 0006813 // potassium ion transport // inferred from electronic annotation /// 0006814 // sodium ion transport // inferred from electronic annotation /// 0006816 // calcium ion transport // inferred from electronic annotation /// 0006874 // cellular calcium ion homeos…
1428861_at	1231.89	1177.22	587.927	1374.3	1352.87	801.477	-0.0023523	-0.0587026	-0.982904	0.50596	0.182127	0.154242	-0.518609	0.698045	2	NM_001040397 /// NM_030163	Filip1l	filamin A interacting protein 1-like	78749	chr16 C1.1
1437020_at	219.317	202.614	197.809	187.381	208.839	135.787	-0.000183468	-0.0992653	-0.0643449	0.956379	-0.203575	-0.0550496	-0.5979	0.660715	2	NM_029337 /// NM_173066	Ep400	E1A binding protein p400	75560	chr5 F	0016568 // chromatin modification // inferred from electronic annotation
1438148_at	100.032	24.3859	545.487	23.5998	16.3299	62.8342	-0.276351	-2.06266	2.52013	5.73635	-2.11546	-2.60383	-0.599802	0.659844	3	NM_203320	Cxcl3	chemokine (C-X-C motif) ligand 3	330122	chr5 E1	0006935 // chemotaxis // inferred from electronic annotation /// 0006954 // inflammatory response // inferred from electronic annotation /// 0006955 // immune response // inferred from electronic annotation /// 0030593 // neutrophil chemotaxis // inferred from direct assay
1426818_at	485.934	408.623	312.512	348.444	360.464	298.028	-0.000256741	-0.233469	-0.553951	0.681152	-0.454611	-0.423628	-0.602298	0.658704	0	NM_001042592 /// NM_025549	Arrdc4	arrestin domain containing 4	66412	chr7 D1		Statin_Pathway_PharmGKB // GenMAPP
1450085_at	273.008	194.279	76.4132	346.374	340.718	165.977	-0.00208971	-0.51628	-1.75567	0.296136	0.359316	0.338854	-0.617234	0.65192	2	NM_011923	Angptl2	angiopoietin-like 2	26360	chr2 B	0007165 // signal transduction // inferred from electronic annotation
1452106_at	6351.51	5912.96	2053.66	6928.71	7548.62	3863.69	-9.21407e-05	-0.0837472	-1.5517	0.341108	0.14811	0.267847	-0.617367	0.651859	0	NM_001029836 /// NM_033525	Npnt	nephronectin	114249	chr3 G3	0001657 // ureteric bud development // inferred from mutant phenotype /// 0001658 // ureteric bud branching // inferred from mutant phenotype /// 0007155 // cell adhesion // inferred from electronic annotation /// 0007160 // cell-matrix adhesion // inferred from direct assay /// 0007160 // cell-matrix adhesion // inferred from physical interaction /// 0007275 // multicellular organismal developme…
1419089_at	5517.44	5208.08	1792.93	6257.61	5943.68	3229.07	-0.00236824	-0.0642704	-1.54133	0.34357	0.204896	0.125115	-0.672572	0.627387	3	NM_011595	Timp3	tissue inhibitor of metalloproteinase 3	21859	chr10 C1|10 C1-D1|10 47.0 cM	0007169 // transmembrane receptor protein tyrosine kinase signaling pathway // non-traceable author statement /// 0014070 // response to organic cyclic substance // inferred from electronic annotation /// 0042246 // tissue regeneration // inferred from electronic annotation /// 0043627 // response to estrogen stimulus // inferred from electronic annotation	Matrix_Metalloproteinases // GenMAPP
1424663_at	583.883	485.106	509.142	491.382	561.978	343.099	-0.000181684	-0.249338	-0.112173	0.925194	-0.223776	-0.0352313	-0.674194	0.626682	0	NM_145430	BC017647	cDNA sequence BC017647	216971	chr11 B5
1425088_at	2494.56	2384.45	1070.43	3012.71	2599.71	1452.28	-0.000205906	-0.0456481	-1.15187	0.45004	0.296458	0.0801565	-0.677381	0.625299	3	NM_011324	Scnn1a	sodium channel, nonvoltage-gated 1 alpha	20276	chr6 F3|6 60.6 cM	0006810 // transport // inferred from electronic annotation /// 0006811 // ion transport // inferred from electronic annotation /// 0006814 // sodium ion transport // inferred from direct assay /// 0006814 // sodium ion transport // inferred from genetic interaction /// 0006814 // sodium ion transport // inferred from electronic annotation /// 0050896 // response to stimulus // inferred from elec…
1439732_at	63.1516	58.7833	30.1317	121.048	106.929	36.5031	-0.000973679	-0.151371	-0.982946	0.505946	0.961439	0.780188	-0.68796	0.620731	0
1435436_at	19938.3	18740.8	8883.46	20534.5	19193.2	11517.7	-0.000363242	-0.070205	-1.08013	0.472988	0.067477	-0.0350263	-0.688963	0.6203	0	NM_010137	Epas1	endothelial PAS domain protein 1	13819	chr17 E4	0001525 // angiogenesis // inferred from mutant phenotype /// 0001525 // angiogenesis // inferred from electronic annotation /// 0001666 // response to hypoxia // inferred from mutant phenotype /// 0001666 // response to hypoxia // not recorded /// 0001666 // response to hypoxia // inferred from electronic annotation /// 0001892 // embryonic placenta development // inferred from genetic interacti…
1455090_at	1169.14	935.867	335.005	1627.61	1521.93	661.111	-0.00183725	-0.301148	-1.71972	0.303607	0.500606	0.401266	-0.721549	0.606446	2	NM_011923	Angptl2	angiopoietin-like 2	26360	chr2 B	0007165 // signal transduction // inferred from electronic annotation
1416803_at	856.16	821.389	369.533	965.472	920.629	461.773	-0.0013813	-0.0508904	-1.12826	0.457466	0.198008	0.124939	-0.789192	0.578668	0	NM_010222	Fkbp7	FK506 binding protein 7	14231	chr2 C3|2 60.5 cM	0006457 // protein folding // inferred from electronic annotation
1431506_s_at	508.593	450.927	595.519	224.063	240.474	274.099	-0.00172132	-0.156766	0.310499	1.24014	-1.1621	-1.06683	-0.792242	0.577446	0	NM_001110129 /// NM_001110130 /// NM_028677	Ppih	peptidyl prolyl isomerase H	66101	chr4 D	0006397 // mRNA processing // inferred from electronic annotation /// 0006457 // protein folding // inferred from electronic annotation /// 0008380 // RNA splicing // inferred from electronic annotation
1438667_at	112.51	95.0218	49.3951	162.092	140.918	60.0337	-0.0057095	-0.269518	-1.10935	0.463502	0.551987	0.346272	-0.80927	0.570671	2	NM_001032727 /// NM_176998 /// NM_178765	5730410E15Rik	RIKEN cDNA 5730410E15 gene	319613	chr15 B3.2
1455663_at	155.895	177.288	49.2439	193.749	182.199	82.5559	-0.00424493	0.199792	-1.58193	0.334034	0.334375	0.243749	-0.814453	0.568624	0	NM_172907	Olfml1	olfactomedin-like 1	244198	chr7 E3
1419186_a_at	1523.16	1819.49	591.453	2066.44	2163.16	797.942	-0.0016513	0.271581	-1.29281	0.408156	0.463612	0.525965	-0.832063	0.561725	0	NM_001159745 /// NM_009183	St8sia4	ST8 alpha-N-acetyl-neuraminide alpha-2,8-sialyltransferase 4	20452	chr1 D	0006486 // protein amino acid glycosylation // inferred from electronic annotation
1422754_at	1157.76	1041.98	347.832	1407.52	1323.8	609.227	-0.00380395	-0.133611	-1.6483	0.319016	0.304478	0.210625	-0.832667	0.56149	0	NM_021883	Tmod1	tropomodulin 1	21916	chr4 B1|4 21.5 cM	0030239 // myofibril assembly // inferred from mutant phenotype /// 0030241 // muscle thick filament assembly // inferred from mutant phenotype	Striated_muscle_contraction // GenMAPP
1425705_a_at	110.891	100.547	141.111	52.7911	55.5754	57.922	-0.0207243	-0.18571	0.431887	1.349	-1.04995	-0.978878	-0.836227	0.560107	0	NM_026184	Ero1lb	ERO1-like beta (S. cerevisiae)	67475	chr13 A1	0006467 // protein thiol-disulfide exchange // inferred from electronic annotation /// 0006810 // transport // inferred from electronic annotation /// 0022900 // electron transport chain // inferred from electronic annotation /// 0055114 // oxidation reduction // inferred from electronic annotation
1454086_a_at	1957.9	2009.31	582.337	2518.3	2486.75	1007.19	-0.000464869	0.0562731	-1.66484	0.315379	0.385599	0.361651	-0.858375	0.551574	0	NM_001142335 /// NM_001142336 /// NM_001142337 /// NM_008505 /// XM_001479884	Lmo2	LIM domain only 2	16909	chr2 E2|2 60.0 cM	0045647 // negative regulation of erythrocyte differentiation // inferred from mutant phenotype
1434475_at	275.84	181.648	171.001	216.347	242.404	139.915	-0.00220903	-0.618903	-0.605154	0.657401	-0.326758	-0.173713	-0.879032	0.543732	3	NM_001081086	Ppig	peptidyl-prolyl isomerase G (cyclophilin G)	228005	chr2 C2	0006457 // protein folding // inferred from electronic annotation
1430514_a_at	2733.99	2616.55	2121.77	1727.66	1696.46	1338.68	-0.00853427	-0.0615281	-0.287253	0.819461	-0.640654	-0.669249	-0.929701	0.524967	0	NM_025584 /// XM_001004429	Cd99	CD99 antigen	673094
1428662_a_at	11225.6	9548.31	3597.49	11657	10239.7	5453.48	-0.000161964	-0.213881	-1.561	0.338916	0.0792969	-0.112217	-0.939854	0.521286	0	NM_001159900 /// NM_001159901 /// NM_175606	Hopx	HOP homeobox	74318	chr5 C3.3	0000122 // negative regulation of transcription from RNA polymerase II promoter // inferred from direct assay /// 0000122 // negative regulation of transcription from RNA polymerase II promoter // inferred from genetic interaction /// 0001829 // trophectodermal cell differentiation // inferred from mutant phenotype /// 0001829 // trophectodermal cell differentiation // not recorded /// 0001829 //…
1416494_at	1611	1636.65	1810.6	820.656	757.195	780.973	-0.00266349	0.0370986	0.255142	1.19345	-0.948941	-1.06874	-0.945132	0.519382	0	NM_001030274	Ndufs5	NADH dehydrogenase (ubiquinone) Fe-S protein 5	595136	chr4 D2	0006810 // transport // inferred from electronic annotation /// 0022900 // electron transport chain // inferred from electronic annotation /// 0032981 // mitochondrial respiratory chain complex I assembly // inferred from electronic annotation
1422758_at	267.948	285.102	80.7245	364.909	347.131	129.249	-0.00137323	0.107842	-1.67395	0.313395	0.46815	0.392952	-0.951135	0.517225	0	NM_018763 /// XM_001471695	Chst2	carbohydrate sulfotransferase 2	54371		0005975 // carbohydrate metabolic process // inferred from electronic annotation /// 0006044 // N-acetylglucosamine metabolic process // traceable author statement /// 0006044 // N-acetylglucosamine metabolic process // inferred from electronic annotation /// 0006790 // sulfur metabolic process // inferred from electronic annotation /// 0006954 // inflammatory response // inferred from electronic…
1451791_at	412.364	407.112	327.798	314.359	345.269	198.163	-0.00248139	-0.0171343	-0.24841	0.841823	-0.370664	-0.237243	-0.955923	0.515512	0	NM_011576	Tfpi	tissue factor pathway inhibitor	21788	chr2 D	0007596 // blood coagulation // inferred from electronic annotation
1453556_x_at	3481.42	3282.48	2626.75	2213.48	2096.24	1655.55	-0.0141407	-0.0808185	-0.322746	0.799547	-0.630704	-0.713197	-0.971712	0.509901	0	NM_025584 /// XM_001004429	Cd99	CD99 antigen	673094
1449145_a_at	13741.6	13286.1	4130.77	14288.3	13600.8	6509.59	-0.000376094	-0.0299395	-1.65558	0.317409	0.0807609	0.00536856	-0.975764	0.508471	0	NM_007616	Cav1	caveolin 1, caveolae protein	12389	chr6 A2	0000165 // MAPKKK cascade // inferred from mutant phenotype /// 0000188 // inactivation of MAPK activity // inferred from mutant phenotype /// 0001570 // vasculogenesis // inferred from mutant phenotype /// 0001666 // response to hypoxia // inferred from mutant phenotype /// 0001937 // negative regulation of endothelial cell proliferation // inferred from mutant phenotype /// 0001937 // negative …	Integrin-mediated_cell_adhesion_KEGG // GenMAPP
1437302_at	524.13	523.739	131.532	696.293	598.834	243.139	-0.00504756	0.0012135	-1.91535	0.265107	0.432847	0.211447	-1.01361	0.495304	1	NM_007420	Adrb2	adrenergic receptor, beta 2	11555	chr18 E1|18 34.0 cM	0001993 // regulation of systemic arterial blood pressure by norepinephrine-epinephrine // inferred from mutant phenotype /// 0002024 // diet induced thermogenesis // inferred from genetic interaction /// 0002025 // vasodilation by norepinephrine-epinephrine involved in regulation of systemic arterial blood pressure // inferred from genetic interaction /// 0002025 // vasodilation by norepinephrin…	Calcium_regulation_in_cardiac_cells // GenMAPP /// GPCRDB_Class_A_Rhodopsin-like // GenMAPP /// Monoamine_GPCRs // GenMAPP
1420431_at	37.7424	20.7107	15.2848	16.0213	17.2053	16.9299	-0.00265039	-0.895093	-1.22016	0.429236	-1.2208	-1.11695	-1.06266	0.478748	0	NM_009100	Rptn	repetin	20129	chr3 F1-F2
1452981_at	126.79	68.1116	45.7661	206.972	102.898	55.7033	-0.00107001	-0.912555	-1.3864	0.382517	0.731423	-0.282565	-1.08909	0.470056	3	NM_001159647 /// NM_001159648 /// NM_007727	Cntn1	contactin 1	12805	chr15 F|15 55.1 cM	0007155 // cell adhesion // inferred from electronic annotation /// 0007219 // Notch signaling pathway // inferred from electronic annotation
1416411_at	3718.21	3680.34	2444.97	2729.67	2559.49	1587.34	-0.000796358	0.00268937	-0.518796	0.697954	-0.42249	-0.518795	-1.12787	0.45759	0	NM_008183	Gstm2	glutathione S-transferase, mu 2	14863	chr3 F2.3	0008152 // metabolic process // inferred from electronic annotation
1436821_at	138.717	108.404	35.8176	213.433	194.853	58.129	-0.00710806	-0.524074	-1.86887	0.273788	0.645733	0.507341	-1.15839	0.448012	0	NM_177355	Plcxd3	phosphatidylinositol-specific phospholipase C, X domain containing 3	239318	chr15 A1	0006629 // lipid metabolic process // inferred from electronic annotation /// 0007165 // signal transduction // inferred from electronic annotation /// 0007242 // intracellular signaling cascade // inferred from electronic annotation /// 0016042 // lipid catabolic process // inferred from electronic annotation
1416778_at	9511.72	9629.73	1770.11	11079.6	10342.2	3926.41	-0.00114311	0.0337127	-2.34379	0.196992	0.243946	0.140992	-1.17547	0.44274	0	NM_138741	Sdpr	serum deprivation response	20324	chr1 C1.1	0045944 // positive regulation of transcription from RNA polymerase II promoter // not recorded
1451342_at	4185.79	4147.33	959.883	4668.76	4534.49	1710.88	-0.000701563	0.00181554	-2.04088	0.243016	0.182292	0.135301	-1.19	0.438303	3	NM_145584	Spon1	spondin 1, (f-spondin) extracellular matrix protein	233744	chr7 F1	0007155 // cell adhesion // inferred from electronic annotation
1436785_a_at	6754.56	5866.51	1441.07	6919.46	6932.18	2738.02	-0.000987129	-0.183981	-2.1496	0.225375	0.059882	0.0580107	-1.19952	0.435421	2		1110069O07Rik	RIKEN cDNA 1110069O07 gene	71798
1418697_at	19033.5	16816.8	3502.26	20043.4	19192.6	7547.09	-0.000299344	-0.161282	-2.3718	0.193204	0.0990398	0.0323617	-1.23859	0.423786	1	NM_009349	Inmt	indolethylamine N-methyltransferase	21743	chr6 B3
1429273_at	614.238	622.756	170.251	935.822	857.53	240.583	-0.00222392	0.0140419	-1.76775	0.293667	0.630154	0.501252	-1.25207	0.419845	3	NM_028472	Bmper	BMP-binding endothelial regulator	73230	chr9 A4	0030514 // negative regulation of BMP signaling pathway // inferred from direct assay
1423223_a_at	10050.7	9399.39	3676.76	6626.55	6513.24	3825.93	-0.00296093	-0.0785464	-1.3648	0.388289	-0.575568	-0.605388	-1.2896	0.409065	0	NM_007453	Prdx6	peroxiredoxin 6	11758	chr1 H2.1|1 83.6 cM	0000302 // response to reactive oxygen species // inferred from mutant phenotype /// 0016042 // lipid catabolic process // inferred from electronic annotation /// 0032060 // bleb formation // inferred from mutant phenotype /// 0045454 // cell redox homeostasis // inferred from electronic annotation /// 0055114 // oxidation reduction // inferred from electronic annotation
1436786_at	12876.1	11782.6	2743.88	14074.9	13603.5	4860.78	-0.000166458	-0.108607	-2.1491	0.225453	0.153072	0.0995614	-1.30585	0.404484	3		1110069O07Rik	RIKEN cDNA 1110069O07 gene	71798
1435043_at	990.729	803.864	236.348	1090.71	902.737	372.272	-0.000474511	-0.30043	-1.98882	0.251945	0.163413	-0.113627	-1.31274	0.402556	1	NM_001145830 /// NM_019677	Plcb1	phospholipase C, beta 1	18795	chr2 F3|2 76.7 cM	0006629 // lipid metabolic process // inferred from electronic annotation /// 0007165 // signal transduction // inferred from electronic annotation /// 0007242 // intracellular signaling cascade // inferred from electronic annotation /// 0016042 // lipid catabolic process // inferred from electronic annotation
1438402_at	555.628	548.742	149.346	628.211	594.429	206.809	-0.000193411	-0.00619704	-1.82716	0.281818	0.202101	0.116897	-1.32743	0.398477	0	NM_001081161	Fam171a1	family with sequence similarity 171, member A1	269233	chr2 A1
1431833_a_at	244.726	157.185	100.471	127.911	136.246	88.7528	-0.0096731	-0.629852	-1.20156	0.434806	-0.910765	-0.828338	-1.36706	0.387681	0	NM_008256	Hmgcs2	3-hydroxy-3-methylglutaryl-Coenzyme A synthase 2	15360	chr3 F2.2|3 48.0 cM	0006694 // steroid biosynthetic process // inferred from electronic annotation /// 0006695 // cholesterol biosynthetic process // inferred from electronic annotation /// 0007584 // response to nutrient // inferred from electronic annotation /// 0008152 // metabolic process // inferred from electronic annotation /// 0008299 // isoprenoid biosynthetic process // inferred from electronic annotation …
1419435_at	1289.09	1155.43	1603.23	270.527	322.503	462.883	-0.000688349	-0.138433	0.386665	1.30737	-2.24619	-1.98025	-1.37899	0.384489	0	NM_009676	Aox1	aldehyde oxidase 1	11761	chr1 C1-C2|1 23.2 cM	0055114 // oxidation reduction // inferred from electronic annotation
1449716_s_at	471.665	395.037	344.161	188.675	187.056	166.051	-0.00593287	-0.251346	-0.371792	0.772822	-1.29961	-1.31529	-1.40463	0.377716	0	NM_146150	Nrd1	nardilysin, N-arginine dibasic convertase, NRD convertase 1	230598	chr4 C7	0006508 // proteolysis // inferred from electronic annotation
1452398_at	861.106	749.351	167.109	1056.09	944.602	300.684	-0.000580764	-0.201519	-2.28881	0.204644	0.318611	0.151947	-1.41606	0.374735	1	NM_019588	Plce1	phospholipase C, epsilon 1	74055	chr19 D1	0000187 // activation of MAPK activity // inferred from electronic annotation /// 0000187 // activation of MAPK activity // inferred from sequence or structural similarity /// 0006629 // lipid metabolic process // inferred from electronic annotation /// 0007165 // signal transduction // inferred from electronic annotation /// 0007200 // activation of phospholipase C activity by G-protein coupled …
1428967_at	406.577	260.596	271.452	324.411	311.515	130.36	-0.0014263	-0.641744	-0.495543	0.709295	-0.30151	-0.367543	-1.54671	0.34229	2	NM_010513	Igf1r	insulin-like growth factor I receptor	16001	chr7 D1|7 33.0 cM	0006468 // protein amino acid phosphorylation // inferred from direct assay /// 0006468 // protein amino acid phosphorylation // inferred from electronic annotation /// 0006955 // immune response // inferred from electronic annotation /// 0007169 // transmembrane receptor protein tyrosine kinase signaling pathway // inferred from electronic annotation /// 0007420 // brain development // inferred …
1420377_at	357.801	402.076	64.244	433.774	477.95	110.115	-0.000777479	0.184282	-2.44399	0.183775	0.301114	0.438538	-1.5968	0.33061	0	NM_009181	St8sia2	ST8 alpha-N-acetyl-neuraminide alpha-2,8-sialyltransferase 2	20450	chr7 D2	0006486 // protein amino acid glycosylation // inferred from electronic annotation
1442613_at	1411.04	1294.88	249.664	1573.6	1512.9	429.033	-5.70727e-05	-0.107143	-2.41345	0.187707	0.182292	0.120971	-1.62047	0.325228	3
1452332_at	410.472	384.928	54.0397	527.251	449.191	119.589	-0.00515013	-0.0994553	-2.84456	0.13922	0.384786	0.138728	-1.67882	0.312338	2	NM_181577	Ccdc85a	coiled-coil domain containing 85A	216613	chr11 A3.3
1439066_at	1213.8	1108.06	202.24	1484.27	1163.67	351.107	-0.00207543	-0.130075	-2.49983	0.176797	0.314663	-0.0417078	-1.68801	0.310355	0	NM_009640	Angpt1	angiopoietin 1	11600	chr15 B3.1|15 14.3 cM	0001525 // angiogenesis // inferred from electronic annotation /// 0007165 // signal transduction // inferred from electronic annotation /// 0007169 // transmembrane receptor protein tyrosine kinase signaling pathway // inferred from direct assay /// 0007275 // multicellular organismal development // inferred from electronic annotation /// 0007492 // endoderm development // traceable author state…
1425627_x_at	1018.13	971.798	513.333	529.928	483.236	277.711	-0.0147482	-0.0596736	-0.903125	0.534727	-0.919455	-1.05785	-1.77272	0.292657	0	NM_010358	Gstm1	glutathione S-transferase, mu 1	14862	chr3 F2.3	0008152 // metabolic process // inferred from electronic annotation
1418209_a_at	932.335	740.852	327.783	671.309	763.39	246.809	-0.00102293	-0.333834	-1.42102	0.373449	-0.453764	-0.267929	-1.81412	0.284378	2	NM_019410	Pfn2	profilin 2	18645	chr3 D|3 29.3 cM	0007010 // cytoskeleton organization // inferred from electronic annotation /// 0030036 // actin cytoskeleton organization // inferred from electronic annotation
1454622_at	1059.66	896.527	125.497	1318.95	1277.96	277.572	-0.00238146	-0.22333	-3.00123	0.124894	0.340627	0.288344	-1.84898	0.277589	2	NM_172479	Slc38a5	solute carrier family 38, member 5	209837	chrX A1.1
1431008_at	1686.5	2095.01	693.289	382.704	577.196	389.923	-0.0297322	0.312566	-1.2069	0.433199	-2.12484	-1.54487	-2.01498	0.247418	0	XM_903697	0610037M15Rik	RIKEN cDNA 0610037M15 gene	68395		0002474 // antigen processing and presentation of peptide antigen via MHC class I // inferred from electronic annotation /// 0006955 // immune response // inferred from electronic annotation /// 0019882 // antigen processing and presentation // inferred from electronic annotation
1419663_at	6699.53	6267.14	590.476	7946.62	6821.71	1507.49	-0.0035764	-0.0842622	-3.41972	0.0934459	0.270752	0.0441885	-2.06337	0.239256	3	NM_008760	Ogn	osteoglycin	18295	chr13 A5
1423437_at	304.424	313.535	91.5016	135.167	131.583	65.5631	-0.000948106	0.0523683	-1.6599	0.316461	-1.14803	-1.19083	-2.11613	0.230665	0	NM_001077353 /// NM_010356	Gsta3	glutathione S-transferase, alpha 3	14859	chr1 A4|1 15.0 cM	0008152 // metabolic process // inferred from electronic annotation
1455859_at	229.174	174.111	71.438	168.899	191.254	48.9221	-0.00219165	-0.410459	-1.59524	0.330967	-0.41956	-0.24089	-2.14422	0.226217	0	NM_172447	A330021E22Rik	RIKEN cDNA A330021E22 gene	207686	chr5 A1
1416416_x_at	6363.17	5826.19	2970.36	2990.29	2696.42	1257.97	-0.000306674	-0.107393	-1.01352	0.495336	-1.06477	-1.22195	-2.23709	0.212113	0	NM_010358	Gstm1	glutathione S-transferase, mu 1	14862	chr3 F2.3	0008152 // metabolic process // inferred from electronic annotation
1433924_at	308.703	178.975	81.701	204.346	136.664	58.1311	-0.00308516	-0.773661	-1.8469	0.277988	-0.569882	-1.15456	-2.31023	0.201628	3
1448330_at	5573.29	5000.68	2631.51	2491.02	2177.36	1016.96	-0.000450746	-0.136454	-0.997786	0.500768	-1.13682	-1.33763	-2.35097	0.196014	3	NM_010358	Gstm1	glutathione S-transferase, mu 1	14862	chr3 F2.3	0008152 // metabolic process // inferred from electronic annotation
1449279_at	628.645	569.031	453.013	154.972	161.826	109.029	-0.0142107	-0.12859	-0.387751	0.76432	-1.99829	-1.94007	-2.42786	0.185841	0	NM_030677	Gpx2	glutathione peroxidase 2	14776	chr12 C3|12 36.0 cM	0001659 // temperature homeostasis // inferred from genetic interaction /// 0002862 // negative regulation of inflammatory response to antigenic stimulus // inferred from genetic interaction /// 0006979 // response to oxidative stress // inferred from electronic annotation /// 0009609 // response to symbiotic bacterium // inferred from genetic interaction /// 0051702 // interaction with symbiont …
1429859_a_at	1388.24	1223.63	924.831	147.19	148.713	200.807	-0.00107767	-0.164772	-0.503843	0.705226	-3.23488	-3.21222	-2.68718	0.155266	0	NM_024191 /// NM_024269	Arl2bp	ADP-ribosylation factor-like 2 binding protein	107566	chr8 C5
1423436_at	1395.83	1568.48	433.331	602.299	600.434	168.817	-0.0143034	0.184763	-1.61	0.327599	-1.19347	-1.19838	-2.95254	0.129181	2	NM_001077353 /// NM_010356	Gsta3	glutathione S-transferase, alpha 3	14859	chr1 A4|1 15.0 cM	0008152 // metabolic process // inferred from electronic annotation
1455490_at	1349.19	959.972	401.044	322.809	423.629	130.351	-0.00186033	-0.547034	-1.9234	0.263633	-2.08631	-1.72975	-3.30505	0.101177	0
1419922_s_at	1677.2	1443.35	1174.45	195.256	176.029	136.244	-0.00309185	-0.203836	-0.43537	0.739504	-3.07997	-3.24147	-3.52	0.0871716	0	NM_181415	Atrnl1	attractin like 1	226255	chr19 D2	0007186 // G-protein coupled receptor protein signaling pathway // inferred from physical interaction
1417112_at	3278.23	2955.11	2050.81	179.49	198.38	139.953	-0.00162058	-0.131492	-0.592818	0.663046	-4.16614	-4.0271	-4.45867	0.0454785	0	NM_024191 /// NM_024269	Arl2bp	ADP-ribosylation factor-like 2 binding protein	107566	chr8 C5

## Sheet: Alphabetical
#Clustering Algorithm: K-Means
#Clustered On: Entities
#Similarity Measure: Euclidean
#Number of Clusters: 4
#Maximum number of iterations: 50
#)
# Technology : Affymetrix.GeneChip.Mouse430_2
# Owner : gxuser
# Created On : Fri Jun 18 15:43:40 EDT 2010										vs WT Sal				vs WT Sal
GeneName	[Nrf2, Saline](raw)	[Nrf2, U-NT](raw)	[Nrf2, U-T](raw)	[Nrf2-KO, Saline](raw)	[Nrf2-KO, U-NT](raw)	[Nrf2-KO, U-T](raw)	[Nrf2, Saline](normalized)	[Nrf2, U-NT](normalized)	[Nrf2, U-T](normalized)	Fold Change in WT tumor	[Nrf2-KO, Saline](normalized)	[Nrf2-KO, U-NT](normalized)	[Nrf2-KO, U-T](normalized)	Fold Change in KO tumor	Cluster (Fig. 7-D)	RefSeq Transcript ID	Gene Symbol	Gene Title	Entrez Gene	Chromosomal Location	Gene Ontology Biological Process	Pathway	QTL
1418083_at	571.481	590.241	886.059	496.324	513.383	708.48	-0.000811186	0.0605093	0.719288	1.64637	-0.181998	-0.134555	0.412555	1.33104	0	NM_025319	0610009B22Rik	RIKEN cDNA 0610009B22 gene	66050	chr11 B1.3	0006350 // transcription // inferred from electronic annotation /// 0006355 // regulation of transcription, DNA-dependent // inferred from sequence or structural similarity /// 0006810 // transport // inferred from electronic annotation /// 0006888 // ER to Golgi vesicle-mediated transport // inferred from electronic annotation /// 0016192 // vesicle-mediated transport // inferred from electronic…
1431008_at	1686.5	2095.01	693.289	382.704	577.196	389.923	-0.0297322	0.312566	-1.2069	0.433199	-2.12484	-1.54487	-2.01498	0.247418	0	XM_903697	0610037M15Rik	RIKEN cDNA 0610037M15 gene	68395		0002474 // antigen processing and presentation of peptide antigen via MHC class I // inferred from electronic annotation /// 0006955 // immune response // inferred from electronic annotation /// 0019882 // antigen processing and presentation // inferred from electronic annotation
1454126_at	26.5719	27.5004	144.128	23.388	26.8016	56.6467	-0.000317046	0.0672001	2.51939	5.73338	-0.160397	0.0318924	1.19441	2.2885	3		0710001A04Rik	RIKEN cDNA 0710001A04 gene	68402
1421682_a_at	43.1683	43.309	32.611	55.1376	57.0474	36.9175	-0.000316107	0.0164018	-0.320475	0.800806	0.37742	0.419247	-0.124571	0.917277	3	NM_001123367 /// NM_001123368 /// NM_011560 /// NM_198104 /// XM_001477686 /// XM_001477697 /// XM_001477804 /// XM_001477817	100041586 /// 100041639 /// Tcte3	predicted gene, 100041586 /// predicted gene, 100041639 /// t-complex-associated testis expressed 3	100041586 /// 100041639 /// 21647	chr17 A2 /// chr17 A2|17 /// chr17 A2|17 8.16 cM	0007018 // microtubule-based movement // inferred from direct assay
1454723_at	478.462	451.93	330.199	581.348	566.716	420.776	-0.00210764	-0.0645901	-0.452073	0.730992	0.304755	0.263766	-0.0836322	0.943679	0	XM_193728 /// XM_911881	1110033M05Rik	RIKEN cDNA 1110033M05 gene	68675	chr13 C1
1436785_a_at	6754.56	5866.51	1441.07	6919.46	6932.18	2738.02	-0.000987129	-0.183981	-2.1496	0.225375	0.059882	0.0580107	-1.19952	0.435421	2		1110069O07Rik	RIKEN cDNA 1110069O07 gene	71798
1436786_at	12876.1	11782.6	2743.88	14074.9	13603.5	4860.78	-0.000166458	-0.108607	-2.1491	0.225453	0.153072	0.0995614	-1.30585	0.404484	3		1110069O07Rik	RIKEN cDNA 1110069O07 gene	71798
1428851_at	430.317	517.544	293.717	2518.53	2240.68	837.138	-0.000982327	0.28006	-0.46644	0.723748	2.563	2.40066	1.06135	2.08688	3	NM_025831	1300014I06Rik	RIKEN cDNA 1300014I06 gene	66895	chr13 A4|13	0007154 // cell communication // inferred from electronic annotation
1460466_at	366.549	350.354	485.72	743.875	774.944	959.661	-0.00114212	-0.0689178	0.492329	1.40671	1.04292	1.09966	1.49095	2.81075	0	NM_028527	1700047I17Rik1	RIKEN cDNA 1700047I17 gene 1	73385	chr12 C1
1449832_at	17.3232	17.9006	22.3235	17.444	16.6748	35.2691	-0.000176623	0.0617894	0.443205	1.35962	0.0265463	-0.0350971	1.12832	2.18604	0	XM_983279	1700091H14Rik	RIKEN cDNA 1700091H14 gene	73553	chr14 B
1418662_at	124.706	139.357	170.635	100.021	105.081	110.162	-4.34925e-05	0.179142	0.537707	1.45166	-0.300773	-0.227963	-0.0795671	0.946342	0	NM_025617	2210012G02Rik	RIKEN cDNA 2210012G02 gene	66526	chr4 C7	0006350 // transcription // inferred from electronic annotation /// 0006354 // RNA elongation // inferred from electronic annotation /// 0006355 // regulation of transcription, DNA-dependent // inferred from electronic annotation
1453173_at	524.662	549.1	709.758	438.798	549.797	565.101	-0.000745927	0.0816824	0.522675	1.43662	-0.233313	0.0862002	0.209875	1.15659	2	NM_172398	2310005E10Rik	RIKEN cDNA 2310005E10 gene	67861	chr6 B1	0055114 // oxidation reduction // inferred from electronic annotation
1428921_at	59.5824	52.5134	53.1571	122.044	101.925	88.2815	-0.0215166	-0.216194	-0.0808367	0.945509	1.05521	0.785142	0.666502	1.58722	2	NM_025479	2810021B07Rik	RIKEN cDNA 2810021B07 gene	66308	chr13 A3.1
1423266_at	375.723	383.895	260.802	543.432	481.188	280.135	-0.0015198	0.0422436	-0.447483	0.733321	0.556951	0.374861	-0.323809	0.798958	3	NM_025582	2810405K02Rik	RIKEN cDNA 2810405K02 gene	66469	chr4 E2
1456779_a_at	90.3247	74.7138	71.3904	135.402	107.605	88.9766	-0.00150675	-0.309531	-0.260926	0.834552	0.606343	0.261721	0.0804694	1.05736	0		4930414L22Rik	RIKEN cDNA 4930414L22 gene	78108
1429669_at	53.7931	60.571	69.0226	61.6588	60.6349	63.7889	-0.000133675	0.173695	0.446604	1.36283	0.221718	0.193059	0.349394	1.27403	0	NR_026888	4930488L21Rik	RIKEN cDNA 4930488L21 gene	75809	chr8 C5
1452993_at	122.484	122.135	281.86	91.7588	89.8698	151.125	-0.0124338	0.00325117	1.28001	2.42841	-0.396624	-0.437096	0.407065	1.32599	0	NM_027789	5430416O09Rik	RIKEN cDNA 5430416O09 gene	71406	chr4 B1
1460172_at	770.456	779.665	622.118	912.397	877.199	683.946	-0.000824328	0.0238975	-0.223903	0.856246	0.268536	0.206956	-0.0689228	0.95335	3	NM_025670	5730403B10Rik	RIKEN cDNA 5730403B10 gene	66626	chr16 A1|16 2.7 cM	0006915 // apoptosis // not recorded /// 0006917 // induction of apoptosis // not recorded /// 0006917 // induction of apoptosis // inferred from electronic annotation /// 0033209 // tumor necrosis factor-mediated signaling pathway // not recorded /// 0033209 // tumor necrosis factor-mediated signaling pathway // inferred from electronic annotation /// 0042771 // DNA damage response, signal trans…
1438667_at	112.51	95.0218	49.3951	162.092	140.918	60.0337	-0.0057095	-0.269518	-1.10935	0.463502	0.551987	0.346272	-0.80927	0.570671	2	NM_001032727 /// NM_176998 /// NM_178765	5730410E15Rik	RIKEN cDNA 5730410E15 gene	319613	chr15 B3.2
1455859_at	229.174	174.111	71.438	168.899	191.254	48.9221	-0.00219165	-0.410459	-1.59524	0.330967	-0.41956	-0.24089	-2.14422	0.226217	0	NM_172447	A330021E22Rik	RIKEN cDNA A330021E22 gene	207686	chr5 A1
1440162_x_at	41.0915	40.2799	88.9583	39.4062	49.8189	36.5376	-0.00722813	-0.0131182	1.19345	2.28699	-0.0445692	0.255177	-0.076553	0.948321	0		A630043P06	hypothetical protein A630043P06	328187	chr13 A1
1443870_at	317.362	310.349	739.132	262.772	286.449	582.18	-0.000310156	-0.0198038	1.30363	2.46849	-0.247594	-0.130375	0.977917	1.96962	2	NM_001033336	Abcc4	ATP-binding cassette, sub-family C (CFTR/MRP), member 4	239273	chr14 E4	0006810 // transport // inferred from electronic annotation /// 0006811 // ion transport // inferred from electronic annotation /// 0006855 // multidrug transport // traceable author statement
1425102_a_at	366.579	290.385	1468.19	316.972	374.338	747.895	-0.00821167	-0.360709	2.0787	4.22425	-0.188753	0.0487203	1.12938	2.18765	3	NM_001130513 /// NM_027286	Ace2	angiotensin I converting enzyme (peptidyl-dipeptidase A) 2	70008	chrX F5|X 70.5 cM	0003051 // angiotensin-mediated drinking behavior // inferred from electronic annotation /// 0003081 // regulation of systemic arterial blood pressure by renin-angiotensin // inferred from electronic annotation /// 0006508 // proteolysis // inferred from electronic annotation /// 0032800 // receptor biosynthetic process // inferred from electronic annotation /// 0046813 // virion attachment, bind…
1422715_s_at	589.401	540.106	920.443	570.109	637.089	741.922	-0.00053582	-0.112979	0.729762	1.65837	-0.0232569	0.130691	0.435035	1.35194	0	NM_001110239 /// NM_021330	Acp1	acid phosphatase 1, soluble	11431	chr12 A2	0006470 // protein amino acid dephosphorylation // inferred from electronic annotation
1452595_at	30.8425	37.5433	77.0205	30.4535	31.348	42.2746	-0.0112875	0.289636	1.40567	2.64941	-0.018517	0.0431267	0.558479	1.47272	0	NM_172845	Adamts4	a disintegrin-like and metallopeptidase (reprolysin type) with thrombospondin type 1 motif, 4	240913	chr1 H3|1 92.3 cM	0006508 // proteolysis // inferred from direct assay /// 0006508 // proteolysis // inferred from electronic annotation
1437302_at	524.13	523.739	131.532	696.293	598.834	243.139	-0.00504756	0.0012135	-1.91535	0.265107	0.432847	0.211447	-1.01361	0.495304	1	NM_007420	Adrb2	adrenergic receptor, beta 2	11555	chr18 E1|18 34.0 cM	0001993 // regulation of systemic arterial blood pressure by norepinephrine-epinephrine // inferred from mutant phenotype /// 0002024 // diet induced thermogenesis // inferred from genetic interaction /// 0002025 // vasodilation by norepinephrine-epinephrine involved in regulation of systemic arterial blood pressure // inferred from genetic interaction /// 0002025 // vasodilation by norepinephrin…	Calcium_regulation_in_cardiac_cells // GenMAPP /// GPCRDB_Class_A_Rhodopsin-like // GenMAPP /// Monoamine_GPCRs // GenMAPP
1441001_at	48.9895	44.7593	48.6304	161.071	76.0784	65.2081	-0.00419172	-0.141098	0.0746861	1.05313	1.72544	0.639612	0.508772	1.42284	2		AI225934	expressed sequence AI225934	98884
1448894_at	889.663	1092.67	2351.02	569.277	821.073	1289.32	-0.013681	0.316289	1.48158	2.79254	-0.619013	-0.0947536	0.639611	1.55791	1	NM_008012	Akr1b8	aldo-keto reductase family 1, member B8	14187	chr6 B1|6 13.0 cM	0055114 // oxidation reduction // inferred from electronic annotation
1455454_at	31.5787	35.2429	77.3904	30.0628	30.9248	50.7112	-8.7219e-05	0.145662	1.37944	2.60167	-0.0492728	-0.0122222	0.780171	1.71733	2	NM_001013785	Akr1c19	aldo-keto reductase family 1, member C19	432720	chr13 A1	0055114 // oxidation reduction // inferred from electronic annotation
1435855_x_at	197.158	200.325	463.318	166.259	200.072	327.297	-0.00600859	0.0274915	1.31917	2.49522	-0.22218	0.0425318	0.83428	1.78297	0	NM_019698 /// NM_153554	Aldh18a1	aldehyde dehydrogenase 18 family, member A1	56454	chr19 C3	0006561 // proline biosynthetic process // inferred from electronic annotation /// 0008152 // metabolic process // inferred from electronic annotation /// 0008652 // amino acid biosynthetic process // traceable author statement /// 0008652 // amino acid biosynthetic process // inferred from electronic annotation /// 0055114 // oxidation reduction // inferred from electronic annotation
1460167_at	724.272	758.104	1021.26	706.587	732.547	703.577	-0.00157556	0.0845964	0.582069	1.49699	-0.0104827	0.0368309	0.0608429	1.04308	0	NM_001127338 /// NM_138600	Aldh7a1	aldehyde dehydrogenase family 7, member A1	110695	chr18 D3|18 29.0 cM	0008152 // metabolic process // inferred from electronic annotation /// 0055114 // oxidation reduction // inferred from electronic annotation
1418844_at	444.268	392.381	548.212	378.875	415.158	452.83	-0.000361309	-0.171866	0.389251	1.30971	-0.205173	-0.0779486	0.131058	1.0951	2	NM_133981	Alg9	asparagine-linked glycosylation 9 homolog (yeast, alpha 1,2 mannosyltransferase)	102580	chr9 A5.3	0006506 // GPI anchor biosynthetic process // inferred from electronic annotation
1439066_at	1213.8	1108.06	202.24	1484.27	1163.67	351.107	-0.00207543	-0.130075	-2.49983	0.176797	0.314663	-0.0417078	-1.68801	0.310355	0	NM_009640	Angpt1	angiopoietin 1	11600	chr15 B3.1|15 14.3 cM	0001525 // angiogenesis // inferred from electronic annotation /// 0007165 // signal transduction // inferred from electronic annotation /// 0007169 // transmembrane receptor protein tyrosine kinase signaling pathway // inferred from direct assay /// 0007275 // multicellular organismal development // inferred from electronic annotation /// 0007492 // endoderm development // traceable author state…
1421002_at	349.325	290.955	132.091	441.299	426.231	244.361	-8.9199e-05	-0.249697	-1.32023	0.400472	0.352279	0.30716	-0.414876	0.750084	2	NM_011923	Angptl2	angiopoietin-like 2	26360	chr2 B	0007165 // signal transduction // inferred from electronic annotation
1450085_at	273.008	194.279	76.4132	346.374	340.718	165.977	-0.00208971	-0.51628	-1.75567	0.296136	0.359316	0.338854	-0.617234	0.65192	2	NM_011923	Angptl2	angiopoietin-like 2	26360	chr2 B	0007165 // signal transduction // inferred from electronic annotation
1455090_at	1169.14	935.867	335.005	1627.61	1521.93	661.111	-0.00183725	-0.301148	-1.71972	0.303607	0.500606	0.401266	-0.721549	0.606446	2	NM_011923	Angptl2	angiopoietin-like 2	26360	chr2 B	0007165 // signal transduction // inferred from electronic annotation
1419435_at	1289.09	1155.43	1603.23	270.527	322.503	462.883	-0.000688349	-0.138433	0.386665	1.30737	-2.24619	-1.98025	-1.37899	0.384489	0	NM_009676	Aox1	aldehyde oxidase 1	11761	chr1 C1-C2|1 23.2 cM	0055114 // oxidation reduction // inferred from electronic annotation
1418858_at	2115.96	2130.43	4216.8	644.16	837.548	1516.34	-0.00452215	0.0269769	1.08066	2.11501	-1.69297	-1.31575	-0.382065	0.767339	0	NM_023617	Aox3	aldehyde oxidase 3	71724	chr1 C1.3|1 23.2 cM	0055114 // oxidation reduction // inferred from electronic annotation
1452870_at	291.961	272.37	208.754	313.304	299.108	244.811	-0.00026017	-0.0853347	-0.39736	0.759246	0.126513	0.0504752	-0.151561	0.900276	2	NM_001042558 /// NM_009684	Apaf1	apoptotic peptidase activating factor 1	11783	chr10 C3-D1|10 48.0 cM	0001843 // neural tube closure // inferred from mutant phenotype /// 0006309 // DNA fragmentation involved in apoptosis // inferred from genetic interaction /// 0006508 // proteolysis // inferred from electronic annotation /// 0006915 // apoptosis // inferred from electronic annotation /// 0006917 // induction of apoptosis // inferred from electronic annotation /// 0006919 // activation of caspas…	Apoptosis // GenMAPP /// Apoptosis_GenMAPP // GenMAPP /// Apoptosis_KEGG // GenMAPP
1417112_at	3278.23	2955.11	2050.81	179.49	198.38	139.953	-0.00162058	-0.131492	-0.592818	0.663046	-4.16614	-4.0271	-4.45867	0.0454785	0	NM_024191 /// NM_024269	Arl2bp	ADP-ribosylation factor-like 2 binding protein	107566	chr8 C5
1429859_a_at	1388.24	1223.63	924.831	147.19	148.713	200.807	-0.00107767	-0.164772	-0.503843	0.705226	-3.23488	-3.21222	-2.68718	0.155266	0	NM_024191 /// NM_024269	Arl2bp	ADP-ribosylation factor-like 2 binding protein	107566	chr8 C5
1426818_at	485.934	408.623	312.512	348.444	360.464	298.028	-0.000256741	-0.233469	-0.553951	0.681152	-0.454611	-0.423628	-0.602298	0.658704	0	NM_001042592 /// NM_025549	Arrdc4	arrestin domain containing 4	66412	chr7 D1		Statin_Pathway_PharmGKB // GenMAPP
1423653_at	2735.86	3144.22	6355.18	2614.85	2992.55	3904.22	-0.00680479	0.215435	1.30094	2.46389	-0.0398535	0.150306	0.616214	1.53285	0	NM_144900	Atp1a1	ATPase, Na+/K+ transporting, alpha 1 polypeptide	11928	chr3 F3|3 48.4 cM	0002026 // regulation of the force of heart contraction // inferred from mutant phenotype /// 0006754 // ATP biosynthetic process // inferred from electronic annotation /// 0006810 // transport // inferred from electronic annotation /// 0006811 // ion transport // inferred from electronic annotation /// 0006812 // cation transport // inferred from electronic annotation /// 0006813 // potassium io…
1419922_s_at	1677.2	1443.35	1174.45	195.256	176.029	136.244	-0.00309185	-0.203836	-0.43537	0.739504	-3.07997	-3.24147	-3.52	0.0871716	0	NM_181415	Atrnl1	attractin like 1	226255	chr19 D2	0007186 // G-protein coupled receptor protein signaling pathway // inferred from physical interaction
1440984_at	109.971	74.7003	140.769	79.3024	94.9054	76.605	-0.011274	-0.56684	0.440563	1.35713	-0.452848	-0.201239	-0.438906	0.737694	0	NM_001001182	Baz2b	bromodomain adjacent to zinc finger domain, 2B	407823	chr2 C1.1
1434460_at	78.3232	93.3104	55.8483	102.761	92.4348	79.6045	-0.00593171	0.271367	-0.407744	0.753801	0.414987	0.255811	0.126004	1.09127	2	NM_175325	Bbs4	Bardet-Biedl syndrome 4 (human)	102774	chr9 B|9 33.0 cM	0000226 // microtubule cytoskeleton organization // inferred from mutant phenotype /// 0001843 // neural tube closure // inferred from mutant phenotype /// 0001895 // retina homeostasis // inferred from mutant phenotype /// 0007286 // spermatid development // inferred from mutant phenotype /// 0007608 // sensory perception of smell // inferred from mutant phenotype /// 0016358 // dendrite develop…
1424663_at	583.883	485.106	509.142	491.382	561.978	343.099	-0.000181684	-0.249338	-0.112173	0.925194	-0.223776	-0.0352313	-0.674194	0.626682	0	NM_145430	BC017647	cDNA sequence BC017647	216971	chr11 B5
1455241_at	22.1086	22.4486	36.2587	17.1562	20.4573	22.7534	-0.00698126	0.0330386	0.797805	1.73845	-0.343407	-0.0955412	0.143029	1.10422	0	NM_172295	BC037703	cDNA sequence BC037703	242125	chr3 F2.2
1418133_at	396.305	355.585	469.064	237.125	301.271	378.096	-0.00696138	-0.138381	0.330045	1.25705	-0.721122	-0.377532	0.033962	1.02382	0	NM_033601	Bcl3	B-cell leukemia/lymphoma 3	12051	chr7 A3|7 6.5 cM	0000060 // protein import into nucleus, translocation // inferred from electronic annotation /// 0002268 // follicular dendritic cell differentiation // inferred from mutant phenotype /// 0002315 // marginal zone B cell differentiation // inferred from mutant phenotype /// 0002455 // humoral immune response mediated by circulating immunoglobulin // inferred from mutant phenotype /// 0002467 // ge…
1450381_a_at	200.487	175.679	235.949	154.409	136.527	187.906	-0.000368687	-0.173745	0.322049	1.25011	-0.353834	-0.535215	0.0098943	1.00688	2	NM_009744	Bcl6	B-cell leukemia/lymphoma 6	12053	chr16 B1|16 13.9 cM	0000060 // protein import into nucleus, translocation // inferred from electronic annotation /// 0000122 // negative regulation of transcription from RNA polymerase II promoter // inferred from direct assay /// 0000122 // negative regulation of transcription from RNA polymerase II promoter // inferred from genetic interaction /// 0000122 // negative regulation of transcription from RNA polymerase…
1451386_at	591.164	631.865	761.2	539.278	546.097	567.299	-0.00228982	0.114865	0.452194	1.36812	-0.106987	-0.0949812	0.0438619	1.03087	0	NM_144923	Blvrb	biliverdin reductase B (flavin reductase (NADPH))	233016	chr7 A3	0008152 // metabolic process // inferred from electronic annotation /// 0044237 // cellular metabolic process // inferred from electronic annotation /// 0055114 // oxidation reduction // inferred from electronic annotation
1429273_at	614.238	622.756	170.251	935.822	857.53	240.583	-0.00222392	0.0140419	-1.76775	0.293667	0.630154	0.501252	-1.25207	0.419845	3	NM_028472	Bmper	BMP-binding endothelial regulator	73230	chr9 A4	0030514 // negative regulation of BMP signaling pathway // inferred from direct assay
1420683_at	96.7382	92.1588	480.783	73.7559	85.2084	300.25	-0.0191116	-0.0553878	2.39944	5.276	-0.366897	-0.165765	1.73118	3.31998	2	NM_134253	Bnipl	BCL2/adenovirus E1B 19kD interacting protein like	171388	chr3 F2.1	0006915 // apoptosis // inferred from electronic annotation /// 0006917 // induction of apoptosis // not recorded
1416924_at	2678.11	2554.12	2786.17	2957.79	2832.72	3460.55	-0.00162996	-0.0501707	0.14328	1.10441	0.16626	0.100485	0.47254	1.38755	0	NM_018772	Bri3	brain protein I3	55950	chr5 G2
1450131_a_at	363.673	365.562	1089.63	282.218	321.805	636.5	-0.00208385	0.022444	1.66571	3.1727	-0.34264	-0.156225	0.909723	1.87869	3	NM_138653	Bspry	B-box and SPRY domain containing	192120	chr4 C1	0006810 // transport // inferred from electronic annotation /// 0006811 // ion transport // inferred from electronic annotation /// 0006816 // calcium ion transport // inferred from electronic annotation
1451222_at	538.833	479.437	607.334	643.606	655.535	705.43	-0.00137132	-0.174232	0.258693	1.19639	0.278703	0.301553	0.491131	1.40555	1	NM_027453	Btf3l4	basic transcription factor 3-like 4	70533	chr4 C7
1417378_at	2658.87	2557.11	1570.17	3299.97	2880.75	2378.49	-0.00019301	-0.0369859	-0.674786	0.626425	0.330553	0.135552	-0.0583512	0.960361	0	NM_001025600 /// NM_018770 /// NM_207675 /// NM_207676	Cadm1	cell adhesion molecule 1	54725	chr9 B-C	0006915 // apoptosis // inferred from electronic annotation /// 0006955 // immune response // inferred from electronic annotation /// 0007049 // cell cycle // inferred from electronic annotation /// 0007155 // cell adhesion // inferred from direct assay /// 0007155 // cell adhesion // inferred from electronic annotation /// 0007156 // homophilic cell adhesion // inferred from direct assay /// 000…
1417376_a_at	1972.41	1968.8	1291.92	2394.77	2359.33	1937.78	-0.000896562	0.0141429	-0.526318	0.694325	0.298608	0.278017	0.074948	1.05332	2	NM_001025600 /// NM_018770 /// NM_207675 /// NM_207676	Cadm1	cell adhesion molecule 1	54725	chr9 B-C	0006915 // apoptosis // inferred from electronic annotation /// 0006955 // immune response // inferred from electronic annotation /// 0007049 // cell cycle // inferred from electronic annotation /// 0007155 // cell adhesion // inferred from direct assay /// 0007155 // cell adhesion // inferred from electronic annotation /// 0007156 // homophilic cell adhesion // inferred from direct assay /// 000…
1424770_at	1460.91	1394.43	2659.56	1338.58	1413.1	1614.3	-0.00035162	-0.0530875	0.947797	1.92892	-0.101498	-0.0299139	0.247513	1.18716	0	NM_145575	Cald1	caldesmon 1	109624	chr6 B1|6 11.5 cM	0006936 // muscle contraction // inferred from electronic annotation /// 0006940 // regulation of smooth muscle contraction // traceable author statement	Smooth_muscle_contraction // GenMAPP
1431255_at	30.569	34.5364	28.0886	40.1919	29.1144	31.7894	-2.95397e-05	0.140363	-0.0416632	0.971534	0.419146	-0.0516682	0.159727	1.11708	0	NM_028500 /// NM_029782	Calr3	calreticulin 3	73316	chr8 C1	0006457 // protein folding // inferred from electronic annotation
1449297_at	261.143	298.208	110.77	308.81	412.136	173.637	-0.00214306	0.184207	-1.15259	0.449818	0.263989	0.676387	-0.488449	0.712791	2	NM_009808	Casp12	caspase 12	12364	chr9 A1|9 1.11 cM	0006508 // proteolysis // inferred from reviewed computational analysis /// 0006508 // proteolysis // inferred from electronic annotation /// 0006915 // apoptosis // inferred from direct assay /// 0006915 // apoptosis // inferred from electronic annotation /// 0006917 // induction of apoptosis // inferred from reviewed computational analysis /// 0006926 // virus-infected cell apoptosis // inferre…
1449145_a_at	13741.6	13286.1	4130.77	14288.3	13600.8	6509.59	-0.000376094	-0.0299395	-1.65558	0.317409	0.0807609	0.00536856	-0.975764	0.508471	0	NM_007616	Cav1	caveolin 1, caveolae protein	12389	chr6 A2	0000165 // MAPKKK cascade // inferred from mutant phenotype /// 0000188 // inactivation of MAPK activity // inferred from mutant phenotype /// 0001570 // vasculogenesis // inferred from mutant phenotype /// 0001666 // response to hypoxia // inferred from mutant phenotype /// 0001937 // negative regulation of endothelial cell proliferation // inferred from mutant phenotype /// 0001937 // negative …	Integrin-mediated_cell_adhesion_KEGG // GenMAPP
1427912_at	592.568	570.467	781.967	453.893	467.9	421.425	-0.00111746	-0.0401046	0.483122	1.39777	-0.367493	-0.320825	-0.390924	0.762641	2	NM_173047	Cbr3	carbonyl reductase 3	109857	chr16 C4|16 67.2 cM	0008152 // metabolic process // inferred from electronic annotation /// 0055114 // oxidation reduction // inferred from electronic annotation
1452332_at	410.472	384.928	54.0397	527.251	449.191	119.589	-0.00515013	-0.0994553	-2.84456	0.13922	0.384786	0.138728	-1.67882	0.312338	2	NM_181577	Ccdc85a	coiled-coil domain containing 85A	216613	chr11 A3.3
1417420_at	3011.25	3054.3	4560.91	2920.94	3886.1	6643.1	-0.0106724	0.0368988	0.685027	1.60773	-0.0210004	0.384749	1.24363	2.36793	2	NM_007631	Ccnd1	cyclin D1	12443	chr7 F5|7 72.3 cM	0000320 // re-entry into mitotic cell cycle // inferred from direct assay /// 0001934 // positive regulation of protein amino acid phosphorylation // inferred from electronic annotation /// 0006468 // protein amino acid phosphorylation // inferred from direct assay /// 0007049 // cell cycle // inferred from direct assay /// 0007049 // cell cycle // inferred from electronic annotation /// 0010039 …	G1_to_S_cell_cycle_Reactome // GenMAPP /// Wnt_Signaling // GenMAPP
1417268_at	1066.22	816.622	4239.48	464.496	620.399	2672.27	-0.00968694	-0.388068	2.07393	4.21031	-1.17272	-0.760576	1.42322	2.68183	3	NM_009841	Cd14	CD14 antigen	12475	chr18 B2|18 31.0 cM	0002237 // response to molecule of bacterial origin // inferred from direct assay /// 0006954 // inflammatory response // inferred from electronic annotation /// 0006955 // immune response // inferred from electronic annotation
1443664_s_at	47.6229	51.5473	217.028	46.1155	49.5017	120.819	-0.0063273	0.132645	2.27403	4.83673	-0.0302743	0.075391	1.44039	2.71394	3	NM_027152	Cd164l2	CD164 sialomucin-like 2	69655	chr4 D3
1416072_at	1677.79	1798.5	1177.53	2034.81	2546.11	1723.76	-6.20188e-05	0.117803	-0.434213	0.740097	0.302217	0.621472	0.141621	1.10314	2	NM_001111059 /// NM_133654	Cd34	CD34 antigen	12490	chr1 H6|1 106.6 cM	0007155 // cell adhesion // inferred from electronic annotation /// 0050900 // leukocyte migration // inferred from mutant phenotype
1430514_a_at	2733.99	2616.55	2121.77	1727.66	1696.46	1338.68	-0.00853427	-0.0615281	-0.287253	0.819461	-0.640654	-0.669249	-0.929701	0.524967	0	NM_025584 /// XM_001004429	Cd99	CD99 antigen	673094
1453556_x_at	3481.42	3282.48	2626.75	2213.48	2096.24	1655.55	-0.0141407	-0.0808185	-0.322746	0.799547	-0.630704	-0.713197	-0.971712	0.509901	0	NM_025584 /// XM_001004429	Cd99	CD99 antigen	673094
1427095_at	459.267	465.651	1100.89	411.761	498.774	856.68	-0.000715049	0.0360129	1.34821	2.54596	-0.134201	0.139871	1.00294	2.00409	2	NM_133974	Cdcp1	CUB domain containing protein 1	109332	chr9 F4
1435338_at	886.993	969.337	417.468	1180.84	1271.3	652.18	-0.00122312	0.146979	-1.01276	0.495598	0.43254	0.538787	-0.340941	0.789526	3	NM_009873	Cdk6	cyclin-dependent kinase 6	12571	chr5 A2-A3|5 1.0 cM	0006468 // protein amino acid phosphorylation // inferred from electronic annotation /// 0007049 // cell cycle // inferred from electronic annotation /// 0030097 // hemopoiesis // inferred from mutant phenotype /// 0051301 // cell division // inferred from electronic annotation
1416868_at	1037.37	1100.2	453.149	1287.62	1409.28	752.186	-0.0089527	0.102263	-1.12079	0.45984	0.336444	0.459279	-0.361644	0.778277	1	NM_007671	Cdkn2c	cyclin-dependent kinase inhibitor 2C (p18, inhibits CDK4)	12580	chr4 C7|4 24.7 cM	0000079 // regulation of cyclin-dependent protein kinase activity // inferred from electronic annotation /// 0000082 // G1/S transition of mitotic cell cycle // inferred from electronic annotation /// 0006917 // induction of apoptosis // inferred from electronic annotation /// 0007049 // cell cycle // inferred from electronic annotation /// 0007050 // cell cycle arrest // inferred from electronic…	G1_to_S_cell_cycle_Reactome // GenMAPP
1436343_at	158.586	173.1	182.175	135.389	123.987	135.42	-0.000522316	0.086876	0.286846	1.21997	-0.208626	-0.337915	-0.125423	0.916735	0	NM_145979	Chd4	chromodomain helicase DNA binding protein 4	107932	chr6 F3|6 58.4 cM	0006333 // chromatin assembly or disassembly // inferred from electronic annotation /// 0006350 // transcription // inferred from electronic annotation /// 0006355 // regulation of transcription, DNA-dependent // inferred from electronic annotation /// 0016568 // chromatin modification // inferred from electronic annotation /// 0045449 // regulation of transcription // inferred from electronic an…
1448477_at	607.592	637.423	442.444	687.824	667.744	560.867	-0.00075742	0.0763775	-0.374943	0.771136	0.203021	0.156353	-0.0124403	0.991414	2	NM_021528	Chst12	carbohydrate sulfotransferase 12	59031	chr5 G2	0005975 // carbohydrate metabolic process // inferred from electronic annotation /// 0016051 // carbohydrate biosynthetic process // inferred from electronic annotation /// 0030206 // chondroitin sulfate biosynthetic process // inferred from sequence or structural similarity /// 0030208 // dermatan sulfate biosynthetic process // inferred from sequence or structural similarity
1422758_at	267.948	285.102	80.7245	364.909	347.131	129.249	-0.00137323	0.107842	-1.67395	0.313395	0.46815	0.392952	-0.951135	0.517225	0	NM_018763 /// XM_001471695	Chst2	carbohydrate sulfotransferase 2	54371		0005975 // carbohydrate metabolic process // inferred from electronic annotation /// 0006044 // N-acetylglucosamine metabolic process // traceable author statement /// 0006044 // N-acetylglucosamine metabolic process // inferred from electronic annotation /// 0006790 // sulfur metabolic process // inferred from electronic annotation /// 0006954 // inflammatory response // inferred from electronic…
1416698_a_at	738.985	847.398	3136.09	649.845	812.018	2157.5	-0.0131502	0.199278	2.16813	4.4944	-0.164774	0.154546	1.64703	3.13188	0	NM_016904	Cks1b	CDC28 protein kinase 1b	54124	chr3 F1	0007049 // cell cycle // inferred from electronic annotation /// 0051301 // cell division // inferred from electronic annotation
1448441_at	156.546	175.234	693.892	137.07	166.761	405.24	-0.00668716	0.179535	2.23217	4.69839	-0.172059	0.109048	1.46953	2.76932	0	NM_016904	Cks1b	CDC28 protein kinase 1b	54124	chr3 F1	0007049 // cell cycle // inferred from electronic annotation /// 0051301 // cell division // inferred from electronic annotation
1417458_s_at	243.19	280.023	1021.64	200.167	287.34	583.64	-0.00406296	0.218563	2.15352	4.44913	-0.260901	0.260649	1.3641	2.57416	0	NM_025415	Cks2	CDC28 protein kinase regulatory subunit 2	66197	chr13 A5	0007049 // cell cycle // inferred from electronic annotation /// 0007127 // meiosis I // inferred from mutant phenotype /// 0051301 // cell division // inferred from electronic annotation
1439117_at	165.267	162.667	449.984	148.404	125.345	299.343	-0.00619601	-0.00212971	1.53154	2.89093	-0.135098	-0.379413	0.955184	1.93883	0	NM_001040682 /// NM_053155	Clmn	calmin	94040	chr12 F1
1431510_s_at	290.46	324.542	500.667	431.635	412.295	591.102	-0.00362448	0.157165	0.868228	1.82542	0.593317	0.524057	1.12726	2.18443	0	NM_026442	Cmc1	COX assembly mitochondrial protein homolog (S. cerevisiae)	67899	chr9 F3
1452981_at	126.79	68.1116	45.7661	206.972	102.898	55.7033	-0.00107001	-0.912555	-1.3864	0.382517	0.731423	-0.282565	-1.08909	0.470056	3	NM_001159647 /// NM_001159648 /// NM_007727	Cntn1	contactin 1	12805	chr15 F|15 55.1 cM	0007155 // cell adhesion // inferred from electronic annotation /// 0007219 // Notch signaling pathway // inferred from electronic annotation
1438779_at	832.615	774.732	520.621	995.735	915.128	799.897	-0.00201515	-0.0888974	-0.592244	0.66331	0.276381	0.155676	0.0431042	1.03033	3	NM_007734	Col4a3	collagen, type IV, alpha 3	12828	chr1 C5	0006917 // induction of apoptosis // inferred from sequence or structural similarity /// 0006919 // activation of caspase activity // inferred from sequence or structural similarity /// 0007155 // cell adhesion // inferred from electronic annotation /// 0007166 // cell surface receptor linked signal transduction // inferred from direct assay /// 0008283 // cell proliferation // inferred from sequ…	mRNA_processing_binding_Reactome // GenMAPP
1429413_at	2909.66	2632.69	7779.42	2558.13	2459.39	5617.93	-0.00274544	-0.125194	1.50271	2.83375	-0.162051	-0.223758	1.05075	2.0716	2	NM_027468 /// XM_917914 /// XM_994613	Cpm	carboxypeptidase M	70574	chr10 D2	0006508 // proteolysis // inferred from electronic annotation
1415948_at	1965.03	1887.8	2155.77	1476.09	1407.89	1681.86	-0.00272367	-0.0413233	0.218677	1.16367	-0.388979	-0.464953	-0.121815	0.919031	3	NM_011804	Creg1	cellular repressor of E1A-stimulated genes 1	433375	chr1 H2.3	0006355 // regulation of transcription, DNA-dependent // inferred from direct assay /// 0040008 // regulation of growth // inferred from electronic annotation
1438610_a_at	588.9	612.747	724.77	741.611	750.603	765.388	-0.000305725	0.0559154	0.384466	1.30538	0.356904	0.366005	0.480965	1.39568	3	NM_009968	Cryz	crystallin, zeta	12972	chr3 H4	0008152 // metabolic process // inferred from electronic annotation /// 0055114 // oxidation reduction // inferred from electronic annotation
1448111_at	118.459	107.661	151.902	732.856	727.359	766.484	-0.00177869	-0.133392	0.434567	1.35151	2.6536	2.62727	2.79671	6.94853	0	NM_018737	Ctps2	cytidine 5'-triphosphate synthase 2	55936	chrX F5	0006221 // pyrimidine nucleotide biosynthetic process // inferred from electronic annotation /// 0006541 // glutamine metabolic process // inferred from electronic annotation
1457644_s_at	387.408	230.708	819.233	168.288	188.369	382.285	-0.00389233	-0.732448	1.16243	2.23834	-1.18641	-1.02511	0.0841511	1.06006	0	NM_008176	Cxcl1	chemokine (C-X-C motif) ligand 1	14825	chr5 E-F|5 51.0 cM	0006954 // inflammatory response // inferred from electronic annotation /// 0006955 // immune response // inferred from electronic annotation
1419209_at	369.501	163.469	970.165	72.2776	70.6173	313.937	-0.0176497	-1.24529	1.4707	2.77157	-2.38495	-2.37082	-0.133514	0.911608	2	NM_008176	Cxcl1	chemokine (C-X-C motif) ligand 1	14825	chr5 E-F|5 51.0 cM	0006954 // inflammatory response // inferred from electronic annotation /// 0006955 // immune response // inferred from electronic annotation
1438148_at	100.032	24.3859	545.487	23.5998	16.3299	62.8342	-0.276351	-2.06266	2.52013	5.73635	-2.11546	-2.60383	-0.599802	0.659844	3	NM_203320	Cxcl3	chemokine (C-X-C motif) ligand 3	330122	chr5 E1	0006935 // chemotaxis // inferred from electronic annotation /// 0006954 // inflammatory response // inferred from electronic annotation /// 0006955 // immune response // inferred from electronic annotation /// 0030593 // neutrophil chemotaxis // inferred from direct assay
1424048_a_at	734.546	811.939	1725.1	754.971	789.547	1309.5	-0.000253857	0.164408	1.31885	2.49468	0.0599049	0.123291	0.936082	1.91332	0	NM_028057	Cyb5r1	cytochrome b5 reductase 1	72017	chr1 E4	0006694 // steroid biosynthetic process // inferred from electronic annotation /// 0008610 // lipid biosynthetic process // inferred from electronic annotation /// 0016126 // sterol biosynthetic process // inferred from electronic annotation /// 0055114 // oxidation reduction // inferred from electronic annotation
1418183_a_at	730.416	705.056	593.396	805.78	813.949	704.762	-0.000614388	-0.0323718	-0.215301	0.861366	0.165791	0.17457	0.0515408	1.03637	3	NM_001112699 /// NM_001112700 /// NM_011180	Cyth1	cytohesin 1	19157	chr11 E2	0030155 // regulation of cell adhesion // inferred from electronic annotation /// 0032012 // regulation of ARF protein signal transduction // inferred from electronic annotation
1437085_at	241.874	230.11	650.356	209.799	222.352	473.796	-0.00408629	-0.0616634	1.51422	2.85644	-0.184305	-0.100263	1.07309	2.10394	3	NM_178727	D630039A03Rik	RIKEN cDNA D630039A03 gene	242484	chr4 B3
1427358_a_at	992.489	978.078	1469.8	680.041	703.554	1127.33	-0.00085557	-0.003308	0.652759	1.57217	-0.522469	-0.476317	0.283285	1.21696	2	NM_029653 /// NM_134062	Dapk1	death associated protein kinase 1	69635	chr13 B2|13 40.0 cM	0006468 // protein amino acid phosphorylation // inferred from direct assay /// 0006468 // protein amino acid phosphorylation // inferred from electronic annotation /// 0006915 // apoptosis // inferred from electronic annotation /// 0006916 // anti-apoptosis // inferred from mutant phenotype /// 0007165 // signal transduction // inferred from electronic annotation /// 0007243 // protein kinase ca…
1426915_at	1565.36	1354.4	2006.36	1071.07	1066.27	1731.8	-0.0024252	-0.19097	0.444312	1.36066	-0.526491	-0.534301	0.247248	1.18694	3	NM_029653 /// NM_134062	Dapk1	death associated protein kinase 1	69635	chr13 B2|13 40.0 cM	0006468 // protein amino acid phosphorylation // inferred from direct assay /// 0006468 // protein amino acid phosphorylation // inferred from electronic annotation /// 0006915 // apoptosis // inferred from electronic annotation /// 0006916 // anti-apoptosis // inferred from mutant phenotype /// 0007165 // signal transduction // inferred from electronic annotation /// 0007243 // protein kinase ca…
1455563_at	393.603	362.366	559.261	376.227	417.747	477.328	-0.00015553	-0.106854	0.593236	1.50863	-0.0404979	0.0997008	0.381324	1.30254	1	NM_001024922	Ddx49	DEAD (Asp-Glu-Ala-Asp) box polypeptide 49	234374	chr8 B3.3
1424303_at	55.0971	57.263	130.196	54.5506	62.7113	69.1634	-0.000790015	0.0121197	1.32258	2.50112	-0.00137074	0.179171	0.427358	1.34477	1	NM_144804	Depdc7	DEP domain containing 7	211896	chr2 E2	0007242 // intracellular signaling cascade // inferred from electronic annotation
1428781_at	948.044	1213.25	12941.9	570.413	767.415	9197.33	-0.0163497	0.364872	3.85725	14.4927	-0.731349	-0.284999	3.38282	10.4311	3	NM_028618 /// NM_172899	Dmkn	dermokine	73712	chr7 A3	0030154 // cell differentiation // inferred from electronic annotation
1424936_a_at	120.116	136.271	99.1406	323.002	288.549	152.196	-0.00189997	0.170056	-0.191156	0.875904	1.43462	1.24762	0.444902	1.36122	0	NM_013811	Dnahc8	dynein, axonemal, heavy chain 8	13417	chr17 A3.3	0007018 // microtubule-based movement // inferred from electronic annotation
1426904_s_at	1108.57	1041.38	1091.45	782.307	885.273	872.688	-0.00148602	-0.0701647	0.0614484	1.04351	-0.477787	-0.304991	-0.241283	0.845993	0	NM_024181 /// XR_033124	Dnajc10 /// LOC100047007	DnaJ (Hsp40) homolog, subfamily C, member 10 /// similar to DnaJ (Hsp40) homolog, subfamily C, member 10	100047007 /// 66861	chr2 D	0006457 // protein folding // inferred from electronic annotation /// 0045454 // cell redox homeostasis // inferred from electronic annotation
1426905_a_at	1507.79	1390.01	1568.34	1112.4	1172.68	1178.34	-0.000242461	-0.102358	0.14299	1.10419	-0.414254	-0.342412	-0.252949	0.839179	2	NM_024181 /// XR_033124	Dnajc10 /// LOC100047007	DnaJ (Hsp40) homolog, subfamily C, member 10 /// similar to DnaJ (Hsp40) homolog, subfamily C, member 10	100047007 /// 66861	chr2 D	0006457 // protein folding // inferred from electronic annotation /// 0045454 // cell redox homeostasis // inferred from electronic annotation
1455884_at	755.598	825.093	2019.65	680.734	695.042	1277.79	-0.00595629	0.142892	1.50486	2.83797	-0.132922	-0.0990994	0.861636	1.8171	2	NM_172624	Dpp9	dipeptidylpeptidase 9	224897	chr17 D	0006508 // proteolysis // inferred from electronic annotation
1436545_at	799.821	741.838	1120.51	598.181	548.426	640.309	-0.005742	-0.0972072	0.56325	1.47759	-0.397485	-0.528389	-0.219525	0.858848	1	NM_172442	Dtx4	deltex 4 homolog (Drosophila)	207521	chr19 A	0007219 // Notch signaling pathway // inferred from electronic annotation
1455711_at	278.97	272.533	415.113	218.439	208.92	280.11	-0.00452567	-0.021889	0.659352	1.57937	-0.334561	-0.396849	0.107401	1.07729	2	NM_172442	Dtx4	deltex 4 homolog (Drosophila)	207521	chr19 A	0007219 // Notch signaling pathway // inferred from electronic annotation
1453473_a_at	4041.19	4060.93	5108.69	2305.1	2845.22	3207.93	-0.00171936	0.0259067	0.424104	1.34174	-0.787207	-0.485831	-0.231382	0.851818	0	NM_009342 /// XM_001475602 /// XM_001475617 /// XM_001475631 /// XM_001475648 /// XM_001481167 /// XM_001481168	Dynlt1 /// Dynlt1d /// ENSMUSG00000056252	dynein light chain Tctex-type 1 /// dynein light chain Tctex-type 1D /// predicted gene, ENSMUSG00000056252	100040603 /// 100043890 /// 21648	chr17 A1|17 /// chr17 A1|17 3.1 cM /// chr6 G1	0007017 // microtubule-based process // inferred from direct assay
1428116_a_at	6977.88	7382.01	8900.11	4298.24	5074.64	6044.87	-0.000950438	0.0983245	0.436944	1.35373	-0.675027	-0.438587	-0.103906	0.93051	1	NM_009342 /// XM_001475602 /// XM_001475617 /// XM_001475631 /// XM_001475648 /// XM_001481167 /// XM_001481168	Dynlt1 /// Dynlt1d /// ENSMUSG00000056252	dynein light chain Tctex-type 1 /// dynein light chain Tctex-type 1D /// predicted gene, ENSMUSG00000056252	100040603 /// 100043890 /// 21648	chr17 A1|17 /// chr17 A1|17 3.1 cM /// chr6 G1	0007017 // microtubule-based process // inferred from direct assay
1444058_at	30.8036	26.0322	50.1405	24.2661	27.1849	32.3631	-0.00599063	-0.262763	0.785628	1.72384	-0.323438	-0.164521	0.169258	1.12448	3	NM_001110017 /// NM_027341	Dzip3	DAZ interacting protein 3, zinc finger	224170	chr16 B5	0000209 // protein polyubiquitination // inferred from electronic annotation /// 0019941 // modification-dependent protein catabolic process // inferred from electronic annotation
1434564_at	160.201	146.237	255.851	132.043	161.716	212.305	-0.000571339	-0.154841	0.76213	1.69599	-0.256053	0.0321552	0.507488	1.42157	0	NM_010093	E2f3	E2F transcription factor 3	13557	chr13 A3.3	0006350 // transcription // inferred from electronic annotation /// 0006355 // regulation of transcription, DNA-dependent // inferred from direct assay /// 0006355 // regulation of transcription, DNA-dependent // inferred from electronic annotation /// 0007049 // cell cycle // inferred from electronic annotation /// 0008284 // positive regulation of cell proliferation // inferred from direct assa…	Cell_Cycle_KEGG // GenMAPP /// G1_to_S_cell_cycle_Reactome // GenMAPP
1440815_x_at	14.5736	14.6515	16.3403	19.7166	18.1844	33.5289	-0.0092719	0.0273266	0.2526	1.19135	0.451086	0.321925	1.30551	2.47171	0	XM_904187 /// XR_033489	EG666481 /// LOC624112	predicted gene, EG666481 /// hypothetical protein LOC624112	624112 /// 666481	chr14 B /// chr14 C1
1449196_a_at	11883.2	12269.6	12948.1	13143.2	12511.1	13854.6	-0.000937683	0.065095	0.210393	1.157	0.169729	0.0940773	0.32432	1.25207	2	NM_001033865 /// NM_024277 /// XR_031334 /// XR_031687 /// XR_033402 /// XR_033646	EG668779 /// LOC100042019 /// Rps27a	predicted gene, EG668779 /// similar to fusion protein: ubiquitin (bases 43_513); ribosomal protein S27a (bases 217_532) /// ribosomal protein S27A	100042019 /// 668779 /// 78294	chr11 A3.3 /// chr7 B5	0006412 // translation // inferred from electronic annotation /// 0006464 // protein modification process // inferred from electronic annotation /// 0016567 // protein ubiquitination // inferred from electronic annotation /// 0045941 // positive regulation of transcription // inferred from electronic annotation
1424344_s_at	608.646	562.591	740.446	520.857	560.107	622.432	-0.000254778	-0.0941078	0.369348	1.29177	-0.202226	-0.101337	0.13536	1.09837	3	NM_010120	Eif1a	eukaryotic translation initiation factor 1A	13664	chr18 C	0006412 // translation // inferred from electronic annotation /// 0006413 // translational initiation // inferred from electronic annotation	Translation_Factors // GenMAPP
1424098_at	75.5586	64.9865	302.073	62.6538	63.3569	156.823	-0.00135494	-0.228758	2.08368	4.23887	-0.251867	-0.233341	1.12488	2.18084	3	NM_029001	Elovl7	ELOVL family member 7, elongation of long chain fatty acids (yeast)	74559	chr13 D2.1	0006633 // fatty acid biosynthetic process // inferred from electronic annotation /// 0008610 // lipid biosynthetic process // inferred from electronic annotation
1423326_at	423.134	434.322	748.414	331.053	401.295	675.097	-0.0045819	0.04441	0.90871	1.87737	-0.330034	-0.0593188	0.77658	1.71307	0	NM_009848	Entpd1	ectonucleoside triphosphate diphosphohydrolase 1	12495	chr19 C3|19 35.5 cM	0006200 // ATP catabolic process // inferred from direct assay /// 0007186 // G-protein coupled receptor protein signaling pathway // inferred from direct assay /// 0009181 // purine ribonucleoside diphosphate catabolic process // inferred from direct assay /// 0030168 // platelet activation // inferred from direct assay
1437020_at	219.317	202.614	197.809	187.381	208.839	135.787	-0.000183468	-0.0992653	-0.0643449	0.956379	-0.203575	-0.0550496	-0.5979	0.660715	2	NM_029337 /// NM_173066	Ep400	E1A binding protein p400	75560	chr5 F	0016568 // chromatin modification // inferred from electronic annotation
1435436_at	19938.3	18740.8	8883.46	20534.5	19193.2	11517.7	-0.000363242	-0.070205	-1.08013	0.472988	0.067477	-0.0350263	-0.688963	0.6203	0	NM_010137	Epas1	endothelial PAS domain protein 1	13819	chr17 E4	0001525 // angiogenesis // inferred from mutant phenotype /// 0001525 // angiogenesis // inferred from electronic annotation /// 0001666 // response to hypoxia // inferred from mutant phenotype /// 0001666 // response to hypoxia // not recorded /// 0001666 // response to hypoxia // inferred from electronic annotation /// 0001892 // embryonic placenta development // inferred from genetic interacti…
1433702_at	892.184	825.27	1477.42	830.322	837.051	990.2	-0.000833022	-0.0958484	0.810343	1.75363	-0.0796465	-0.0729978	0.252131	1.19096	0	NM_001081213	Ermp1	endoplasmic reticulum metallopeptidase 1	226090	chr19 C1|19 24.5 cM	0006508 // proteolysis // inferred from electronic annotation
1425705_a_at	110.891	100.547	141.111	52.7911	55.5754	57.922	-0.0207243	-0.18571	0.431887	1.349	-1.04995	-0.978878	-0.836227	0.560107	0	NM_026184	Ero1lb	ERO1-like beta (S. cerevisiae)	67475	chr13 A1	0006467 // protein thiol-disulfide exchange // inferred from electronic annotation /// 0006810 // transport // inferred from electronic annotation /// 0022900 // electron transport chain // inferred from electronic annotation /// 0055114 // oxidation reduction // inferred from electronic annotation
1434714_at	545.381	481.724	698.775	421.983	426.935	370.951	-0.0042148	-0.159518	0.439941	1.35655	-0.345739	-0.337735	-0.453147	0.730448	0	NM_026184	Ero1lb	ERO1-like beta (S. cerevisiae)	67475	chr13 A1	0006467 // protein thiol-disulfide exchange // inferred from electronic annotation /// 0006810 // transport // inferred from electronic annotation /// 0022900 // electron transport chain // inferred from electronic annotation /// 0055114 // oxidation reduction // inferred from electronic annotation
1447685_x_at	619.979	580.56	374.112	746.072	627.262	450.688	-0.00250124	-0.0778936	-0.642819	0.64046	0.290225	0.0346142	-0.357516	0.780507	0	NM_011809	Ets2	E26 avian leukemia oncogene 2, 3' domain	23872	chr16 C3-qter|16 69.6 cM	0006355 // regulation of transcription, DNA-dependent // inferred from electronic annotation	Smooth_muscle_contraction // GenMAPP
1423232_at	112.877	121.859	378.814	109.208	117.573	232.264	-0.00175188	0.130572	1.83193	3.56014	-0.0229233	0.0777715	1.13959	2.20318	2	NM_008815	Etv4	ets variant gene 4 (E1A enhancer binding protein, E1AF)	18612	chr11 D|11 60.0 cM	0006350 // transcription // inferred from electronic annotation /// 0006355 // regulation of transcription, DNA-dependent // inferred from electronic annotation /// 0008045 // motor axon guidance // inferred from mutant phenotype /// 0009887 // organ morphogenesis // inferred from direct assay /// 0045941 // positive regulation of transcription // inferred from direct assay /// 0045941 // positiv…
1434263_at	466.309	538.022	539.887	528.06	594.675	669.193	-0.00192649	0.224121	0.297448	1.22897	0.203014	0.367806	0.623739	1.54086	3	NM_028657	F630110N24Rik	RIKEN cDNA F630110N24 gene	73822	chr10 C1	0006810 // transport // inferred from electronic annotation
1438402_at	555.628	548.742	149.346	628.211	594.429	206.809	-0.000193411	-0.00619704	-1.82716	0.281818	0.202101	0.116897	-1.32743	0.398477	0	NM_001081161	Fam171a1	family with sequence similarity 171, member A1	269233	chr2 A1
1438641_x_at	119.158	140.532	70.1454	178.148	140.251	79.1519	-0.000487325	0.256995	-0.692573	0.618749	0.605104	0.255446	-0.490473	0.711792	3	NM_001146347 /// NM_026884 /// NM_029978 /// XM_001480258 /// XM_924242	Fam57b	family with sequence similarity 57, member B	68952	chr7 F4
1437602_at	16.2414	21.1961	20.6789	16.3465	20.0319	26.4557	-0.000228349	0.384995	0.434762	1.35169	0.0307549	0.321996	0.806689	1.74919	0	NM_001013783 /// XM_001471494	Fam71b	family with sequence similarity 71, member B	432552	chr11 B1.1|11
1448470_at	233.575	322.815	1795.13	179.991	281.334	1034.4	-0.00841916	0.486601	3.02709	8.15162	-0.354075	0.288761	2.25051	4.75851	0	NM_019395	Fbp1	fructose bisphosphatase 1	14121	chr13 B3-C1	0005975 // carbohydrate metabolic process // inferred from electronic annotation /// 0006094 // gluconeogenesis // inferred from electronic annotation	Glycolysis_and_Gluconeogenesis // GenMAPP
1449088_at	623.98	984.386	5274.59	582.653	904.768	3783.4	-0.00336802	0.673742	3.16401	8.96318	-0.0832789	0.549874	2.70249	6.50925	0	NM_007994	Fbp2	fructose bisphosphatase 2	14120	chr13 B3	0005975 // carbohydrate metabolic process // inferred from electronic annotation /// 0006094 // gluconeogenesis // inferred from electronic annotation	Glycolysis_and_Gluconeogenesis // GenMAPP
1423491_at	187.632	190.556	148.514	215.205	200.554	175.21	-0.000611002	0.0405703	-0.251187	0.840205	0.221499	0.116092	0.00364852	1.00253	0	NM_020593 /// NM_212433	Fbxo3	F-box protein 3	57443	chr2 E2	0019941 // modification-dependent protein catabolic process // inferred from electronic annotation
1449555_a_at	69.7528	67.3838	778.189	46.0541	58.369	282.146	-0.00135276	-0.0321427	3.56435	11.8298	-0.579511	-0.242375	2.10124	4.29078	0	NM_001083904 /// NM_001083905 /// NM_021564	Fetub	fetuin beta	59083	chr16 B|16 14.1 cM
1424279_at	27.9348	31.4502	55.0776	22.7492	18.9899	28.3595	-0.00432402	0.151108	1.05885	2.08327	-0.2742	-0.539235	0.121609	1.08795	0	NM_001111048 /// NM_010196	Fga	fibrinogen alpha chain	14161	chr3 F1|3 44.8 cM	0007165 // signal transduction // inferred from electronic annotation /// 0007596 // blood coagulation // inferred from mutant phenotype /// 0030168 // platelet activation // inferred from electronic annotation /// 0051258 // protein polymerization // inferred from electronic annotation	Blood_Clotting_Cascade // GenMAPP
1428919_at	455.009	450.518	762.261	421.912	464.088	539.14	-0.00270222	0.00362295	0.830227	1.77796	-0.0833877	0.0479676	0.346697	1.27165	1	NM_201230	Fgfr1op	Fgfr1 oncogene partner	75296	chr17 A1	0034453 // microtubule anchoring // inferred from electronic annotation
1428861_at	1231.89	1177.22	587.927	1374.3	1352.87	801.477	-0.0023523	-0.0587026	-0.982904	0.50596	0.182127	0.154242	-0.518609	0.698045	2	NM_001040397 /// NM_030163	Filip1l	filamin A interacting protein 1-like	78749	chr16 C1.1
1416803_at	856.16	821.389	369.533	965.472	920.629	461.773	-0.0013813	-0.0508904	-1.12826	0.457466	0.198008	0.124939	-0.789192	0.578668	0	NM_010222	Fkbp7	FK506 binding protein 7	14231	chr2 C3|2 60.5 cM	0006457 // protein folding // inferred from electronic annotation
1426570_a_at	60.1101	52.921	282.62	45.8827	69.3046	196.458	-0.00123569	-0.297253	2.31856	4.98834	-0.374324	0.211064	1.81031	3.50717	3	NM_001159544 /// NM_010237	Frk	fyn-related kinase	14302	chr10 B1	0006468 // protein amino acid phosphorylation // inferred from electronic annotation
1437284_at	2153.01	2092.46	2352.65	1890.86	1964.36	1928.6	-0.000350393	-0.0215873	0.21466	1.16043	-0.16314	-0.112986	-0.0576696	0.960815	0	NM_021457	Fzd1	frizzled homolog 1 (Drosophila)	14362	chr5 A1|5 5.0 cM	0007165 // signal transduction // inferred from electronic annotation /// 0007166 // cell surface receptor linked signal transduction // inferred from electronic annotation /// 0007186 // G-protein coupled receptor protein signaling pathway // inferred from electronic annotation /// 0007267 // cell-cell signaling // inferred from direct assay /// 0007275 // multicellular organismal development //…	GPCRDB_Other // GenMAPP /// Wnt_Signaling // GenMAPP
1448354_at	844.429	933.081	1282.41	733.216	769.776	861.785	-0.00207815	0.162842	0.688781	1.61192	-0.19256	-0.115231	0.132376	1.0961	3	NM_008062	G6pdx	glucose-6-phosphate dehydrogenase X-linked	14381	chrX A2-A3|X 30.02 cM	0001816 // cytokine production // inferred from mutant phenotype /// 0001998 // angiotensin mediated vasoconstriction involved in regulation of systemic arterial blood pressure // inferred from mutant phenotype /// 0002033 // vasodilation by angiotensin involved in regulation of systemic arterial blood pressure // inferred from mutant phenotype /// 0005975 // carbohydrate metabolic process // inf…	Pentose_Phosphate_Pathway // GenMAPP
1437760_at	142.802	119.503	263.315	112.761	117.573	113.645	-0.00455699	-0.246097	0.957662	1.94216	-0.315163	-0.263073	-0.239125	0.847259	0	NM_172693	Galnt12	UDP-N-acetyl-alpha-D-galactosamine:polypeptide N-acetylgalactosaminyltransferase 12	230145	chr4 B1
1420499_at	359.009	317.188	555.06	243.462	311.386	422.177	-0.00316166	-0.173246	0.714098	1.64046	-0.540009	-0.187511	0.336491	1.26268	0	NM_008102	Gch1	GTP cyclohydrolase 1	14528	chr14 C2-3|14 19.5 cM	0006729 // tetrahydrobiopterin biosynthetic process // inferred by curator /// 0006729 // tetrahydrobiopterin biosynthetic process // inferred from electronic annotation /// 0006917 // induction of apoptosis // inferred from electronic annotation /// 0008217 // regulation of blood pressure // inferred from mutant phenotype /// 0014916 // regulation of lung blood pressure // inferred from mutant p…
1424296_at	2875.08	2556.08	3541.63	1223.95	1325.68	2208.63	-0.00115482	-0.152326	0.38394	1.3049	-1.21389	-1.09925	-0.278647	0.824364	0	NM_010295	Gclc	glutamate-cysteine ligase, catalytic subunit	14629	chr9 D-E|9 42.0 cM	0006534 // cysteine metabolic process // inferred from electronic annotation /// 0006534 // cysteine metabolic process // inferred from sequence or structural similarity /// 0006536 // glutamate metabolic process // inferred from electronic annotation /// 0006536 // glutamate metabolic process // inferred from sequence or structural similarity /// 0006749 // glutathione metabolic process // infer…
1455959_s_at	2258.95	2221.29	3470.62	1157.83	1231.46	2656.7	-0.000483756	-0.00597069	0.703026	1.62792	-0.941015	-0.855102	0.333294	1.25989	3	NM_010295	Gclc	Glutamate-cysteine ligase, catalytic subunit, mRNA (cDNA clone MGC:30487 IMAGE:4195425)	14629	chr9 D-E|9 42.0 cM	0006534 // cysteine metabolic process // inferred from electronic annotation /// 0006534 // cysteine metabolic process // inferred from sequence or structural similarity /// 0006536 // glutamate metabolic process // inferred from electronic annotation /// 0006536 // glutamate metabolic process // inferred from sequence or structural similarity /// 0006749 // glutathione metabolic process // infer…
1448766_at	40.0219	45.3315	543.64	26.9576	33.6246	229.848	-0.030259	0.195337	3.8496	14.416	-0.545418	-0.232166	2.61964	6.14596	0	NM_008124	Gjb1	gap junction protein, beta 1	14618	chrX D-F4|X 41.0 cM	0007154 // cell communication // inferred from electronic annotation	Calcium_regulation_in_cardiac_cells // GenMAPP
1448767_s_at	121.847	192.873	1490.23	87.6756	105.115	679.55	-0.0138313	0.65392	3.69543	12.9549	-0.470574	-0.191984	2.58372	5.99482	0	NM_008124	Gjb1	gap junction protein, beta 1	14618	chrX D-F4|X 41.0 cM	0007154 // cell communication // inferred from electronic annotation	Calcium_regulation_in_cardiac_cells // GenMAPP
1424108_at	638.182	638.615	882.538	1417.45	1383.26	1543.88	-0.00133987	0.0207357	0.555001	1.46917	1.17473	1.13703	1.37838	2.59976	0	NM_001113560 /// NM_025374	Glo1	glyoxalase 1	109801	chr17 A3.3|17 16.0 cM	0006916 // anti-apoptosis // inferred from electronic annotation /// 0006916 // anti-apoptosis // inferred from sequence or structural similarity
1424109_a_at	1197.1	1214.05	2052.26	2485.3	2573.27	3643.27	-0.00189981	0.0384427	0.86382	1.81985	1.07502	1.12337	1.7074	3.26572	2	NM_001113560 /// NM_025374	Glo1	glyoxalase 1	109801	chr17 A3.3|17 16.0 cM	0006916 // anti-apoptosis // inferred from electronic annotation /// 0006916 // anti-apoptosis // inferred from sequence or structural similarity
1455726_at	278.374	324.319	1578.89	263.111	305.195	1107.33	-2.61778e-05	0.238156	2.58997	6.02086	-0.0596042	0.147014	2.09172	4.26256	0	NM_001033236	Gm71	gene model 71, (NCBI)	207965	chr12 C2
1415698_at	827.311	980.99	6727.63	789.109	959.759	4820.78	-0.0024226	0.263645	3.10938	8.63011	-0.0425067	0.234792	2.64315	6.24694	0	NM_001035122 /// NM_027307	Golm1	golgi membrane protein 1	105348	chr13 B3
1439489_at	240.683	243.744	412.085	151.386	203.964	294.81	-0.00509257	0.0356373	0.860498	1.81567	-0.645346	-0.219973	0.394654	1.31463	0	NM_181748	Gpr120	G protein-coupled receptor 120	107221	chr19 C2-C3	0007165 // signal transduction // inferred from electronic annotation /// 0007186 // G-protein coupled receptor protein signaling pathway // inferred from direct assay /// 0007186 // G-protein coupled receptor protein signaling pathway // inferred from electronic annotation /// 0046879 // hormone secretion // inferred from direct assay
1450881_s_at	1496.85	1479.64	1064.71	1836.84	1946.22	1537.23	-0.00098437	-0.000273938	-0.407767	0.753789	0.316012	0.397407	0.140118	1.102	3	NM_031999	Gpr137b	G protein-coupled receptor 137B	83924	chr13 A1|13 6.0 cM
1433485_x_at	520.268	592.514	2139.85	460.166	508.15	1638.52	-0.0015379	0.189782	2.12662	4.36692	-0.156712	-0.0129633	1.75572	3.37695	3	NM_018882	Gpr56	G protein-coupled receptor 56	14766	chr8 D1|8 45.0 cM	0007165 // signal transduction // inferred from electronic annotation /// 0007166 // cell surface receptor linked signal transduction // inferred from electronic annotation /// 0007186 // G-protein coupled receptor protein signaling pathway // inferred from electronic annotation /// 0007218 // neuropeptide signaling pathway // inferred from electronic annotation	GPCRDB_Other // GenMAPP
1430834_at	34.1402	30.6755	78.8852	28.1703	27.9929	43.6805	-0.00789902	-0.218003	1.29204	2.44873	-0.262348	-0.281131	0.446842	1.36305	2	NM_183183	Gprin3	GPRIN family member 3	243385	chr6 B3
1439566_at	108.878	63.9551	185.943	47.2448	81.8586	74.3285	-0.0280356	-0.789962	0.85324	1.80655	-1.1881	-0.400479	-0.457539	0.728227	3	NM_183183	Gprin3	GPRIN family member 3	243385	chr6 B3
1449279_at	628.645	569.031	453.013	154.972	161.826	109.029	-0.0142107	-0.12859	-0.387751	0.76432	-1.99829	-1.94007	-2.42786	0.185841	0	NM_030677	Gpx2	glutathione peroxidase 2	14776	chr12 C3|12 36.0 cM	0001659 // temperature homeostasis // inferred from genetic interaction /// 0002862 // negative regulation of inflammatory response to antigenic stimulus // inferred from genetic interaction /// 0006979 // response to oxidative stress // inferred from electronic annotation /// 0009609 // response to symbiotic bacterium // inferred from genetic interaction /// 0051702 // interaction with symbiont …
1435402_at	123.675	130.703	335.995	112.16	146.197	256.604	-0.0086401	0.0943143	1.52883	2.88552	-0.118501	0.261365	1.15723	2.23029	2	NM_172768	Gramd1b	GRAM domain containing 1B	235283	chr9 B
1423437_at	304.424	313.535	91.5016	135.167	131.583	65.5631	-0.000948106	0.0523683	-1.6599	0.316461	-1.14803	-1.19083	-2.11613	0.230665	0	NM_001077353 /// NM_010356	Gsta3	glutathione S-transferase, alpha 3	14859	chr1 A4|1 15.0 cM	0008152 // metabolic process // inferred from electronic annotation
1423436_at	1395.83	1568.48	433.331	602.299	600.434	168.817	-0.0143034	0.184763	-1.61	0.327599	-1.19347	-1.19838	-2.95254	0.129181	2	NM_001077353 /// NM_010356	Gsta3	glutathione S-transferase, alpha 3	14859	chr1 A4|1 15.0 cM	0008152 // metabolic process // inferred from electronic annotation
1416416_x_at	6363.17	5826.19	2970.36	2990.29	2696.42	1257.97	-0.000306674	-0.107393	-1.01352	0.495336	-1.06477	-1.22195	-2.23709	0.212113	0	NM_010358	Gstm1	glutathione S-transferase, mu 1	14862	chr3 F2.3	0008152 // metabolic process // inferred from electronic annotation
1425627_x_at	1018.13	971.798	513.333	529.928	483.236	277.711	-0.0147482	-0.0596736	-0.903125	0.534727	-0.919455	-1.05785	-1.77272	0.292657	0	NM_010358	Gstm1	glutathione S-transferase, mu 1	14862	chr3 F2.3	0008152 // metabolic process // inferred from electronic annotation
1448330_at	5573.29	5000.68	2631.51	2491.02	2177.36	1016.96	-0.000450746	-0.136454	-0.997786	0.500768	-1.13682	-1.33763	-2.35097	0.196014	3	NM_010358	Gstm1	glutathione S-transferase, mu 1	14862	chr3 F2.3	0008152 // metabolic process // inferred from electronic annotation
1416411_at	3718.21	3680.34	2444.97	2729.67	2559.49	1587.34	-0.000796358	0.00268937	-0.518796	0.697954	-0.42249	-0.518795	-1.12787	0.45759	0	NM_008183	Gstm2	glutathione S-transferase, mu 2	14863	chr3 F2.3	0008152 // metabolic process // inferred from electronic annotation
1427473_at	68.9941	58.7464	67.2391	50.3782	51.4945	52.4799	-0.000752858	-0.212084	0.0499174	1.03521	-0.428255	-0.403081	-0.29122	0.817211	2	NM_010359	Gstm3	glutathione S-transferase, mu 3	14864		0008152 // metabolic process // inferred from electronic annotation	Circadian_Exercise // GenMAPP
1449575_a_at	8892.42	8727.37	9518.91	7601.48	8005.25	7301.71	-0.000935563	-0.00726156	0.185544	1.13725	-0.200776	-0.131193	-0.181218	0.881958	0	NM_013541	Gstp1	glutathione S-transferase, pi 1	14870	chr19 A|19 0.0 cM	0006749 // glutathione metabolic process // inferred from direct assay /// 0008152 // metabolic process // inferred from electronic annotation	Circadian_Exercise // GenMAPP
1418186_at	2238.95	2448.48	4145.27	2124.04	2377.98	3038.83	-0.00182082	0.146704	0.974599	1.96509	-0.0518463	0.106491	0.542449	1.45644	0	NM_008185	Gstt1	glutathione S-transferase, theta 1	14871	chr10 B5-C1|10 40.7 cM	0006749 // glutathione metabolic process // inferred from direct assay
1423891_at	613.133	626.007	1866.65	498.323	554.761	1300.67	-0.00332402	0.0449574	1.69119	3.22924	-0.274878	-0.124029	1.18772	2.27792	0	NM_133994	Gstt3	glutathione S-transferase, theta 3	103140	chr10 C1	0006749 // glutathione metabolic process // inferred from direct assay
1434290_at	231.085	213.452	151.715	269.164	242.087	173.44	-4.71313e-05	-0.0952562	-0.522565	0.696133	0.244978	0.0825097	-0.310976	0.806096	0	NM_172662	Gtdc1	glycosyltransferase-like domain containing 1	227835	chr2 B	0009058 // biosynthetic process // inferred from electronic annotation
1420626_at	551.497	504.207	797.988	471.039	505.628	620.827	-0.00116379	-0.117222	0.619983	1.53686	-0.204362	-0.104764	0.272391	1.20781	2	NM_026113	Gtf3c6	general transcription factor IIIC, polypeptide 6, alpha	67371	chr10 B1	0006350 // transcription // inferred from electronic annotation /// 0006351 // transcription, DNA-dependent // inferred from electronic annotation
1419869_s_at	2237.99	1964.09	2499.6	1964.17	1908.14	2050.25	-0.00232728	-0.169572	0.246699	1.18649	-0.163053	-0.209463	-0.0232409	0.98402	3	NM_133808	Hdlbp	high density lipoprotein (HDL) binding protein	110611	chr1 D|1 55.3 cM	0006629 // lipid metabolic process // inferred from electronic annotation /// 0006810 // transport // inferred from electronic annotation /// 0006869 // lipid transport // inferred from electronic annotation /// 0008202 // steroid metabolic process // inferred from electronic annotation /// 0008203 // cholesterol metabolic process // inferred from electronic annotation
1424522_at	891.959	901.077	1477.18	633.495	575.707	715.7	-0.00132927	0.0341078	0.812559	1.75632	-0.478211	-0.612923	-0.223891	0.856253	2	NM_144835	Heatr1	HEAT repeat containing 1	217995	chr13 A1
1425900_at	230.023	252.518	875.17	233.984	256.095	599.003	-0.00278278	0.148776	2.01493	4.04161	0.0485978	0.175629	1.47653	2.78279	3	NM_145419	Hkdc1	hexokinase domain containing 1	216019	chr10 B4	0005975 // carbohydrate metabolic process // inferred from electronic annotation /// 0006096 // glycolysis // inferred from electronic annotation
1431833_a_at	244.726	157.185	100.471	127.911	136.246	88.7528	-0.0096731	-0.629852	-1.20156	0.434806	-0.910765	-0.828338	-1.36706	0.387681	0	NM_008256	Hmgcs2	3-hydroxy-3-methylglutaryl-Coenzyme A synthase 2	15360	chr3 F2.2|3 48.0 cM	0006694 // steroid biosynthetic process // inferred from electronic annotation /// 0006695 // cholesterol biosynthetic process // inferred from electronic annotation /// 0007584 // response to nutrient // inferred from electronic annotation /// 0008152 // metabolic process // inferred from electronic annotation /// 0008299 // isoprenoid biosynthetic process // inferred from electronic annotation …
1421224_a_at	140.467	109.351	504.933	127.117	129.801	366.484	-0.0016886	-0.346311	1.93101	3.81323	-0.119296	-0.0935409	1.48337	2.79601	3	NM_009330	Hnf1b	HNF1 homeobox B	21410	chr11 C|11 44.0 cM	0001822 // kidney development // inferred from sequence or structural similarity /// 0001822 // kidney development // inferred from electronic annotation /// 0001826 // inner cell mass cell differentiation // inferred from mutant phenotype /// 0006350 // transcription // inferred from electronic annotation /// 0006355 // regulation of transcription, DNA-dependent // inferred from electronic annot…
1428662_a_at	11225.6	9548.31	3597.49	11657	10239.7	5453.48	-0.000161964	-0.213881	-1.561	0.338916	0.0792969	-0.112217	-0.939854	0.521286	0	NM_001159900 /// NM_001159901 /// NM_175606	Hopx	HOP homeobox	74318	chr5 C3.3	0000122 // negative regulation of transcription from RNA polymerase II promoter // inferred from direct assay /// 0000122 // negative regulation of transcription from RNA polymerase II promoter // inferred from genetic interaction /// 0001829 // trophectodermal cell differentiation // inferred from mutant phenotype /// 0001829 // trophectodermal cell differentiation // not recorded /// 0001829 //…
1450729_at	3781.87	4143.09	2376.33	4683.11	5076.94	3480.96	-0.00241403	0.146435	-0.586768	0.665833	0.32704	0.444647	-0.0168087	0.988417	3	NM_011828	Hs2st1	heparan sulfate 2-O-sulfotransferase 1	23908	chr3 H2	0015014 // heparan sulfate proteoglycan biosynthetic process, polysaccharide chain biosynthetic process // inferred from mutant phenotype /// 0030202 // heparin metabolic process // inferred from mutant phenotype
1416761_at	103.404	137.906	344.574	104.926	128.442	163.638	-0.00325336	0.422054	1.81513	3.51892	0.0427695	0.331365	0.757318	1.69034	2	NM_008289	Hsd11b2	hydroxysteroid 11-beta dehydrogenase 2	15484	chr8 D3|8 50.8 cM	0002017 // regulation of blood volume by renal aldosterone // inferred from electronic annotation /// 0008152 // metabolic process // inferred from electronic annotation /// 0008211 // glucocorticoid metabolic process // inferred from electronic annotation /// 0055114 // oxidation reduction // inferred from electronic annotation	Glucocorticoid_Mineralocorticoid_Metabolism // GenMAPP /// Prostaglandin_synthesis_regulation // GenMAPP
1448286_at	1019.31	1126.11	2607.24	1048.32	1058.91	1949.43	-0.00089776	0.162473	1.44175	2.71651	0.0631992	0.073204	1.03775	2.05302	0	NM_016763	Hsd17b10	hydroxysteroid (17-beta) dehydrogenase 10	15108	chrX F3	0008033 // tRNA processing // inferred from electronic annotation /// 0008152 // metabolic process // inferred from electronic annotation /// 0055114 // oxidation reduction // inferred from electronic annotation
1431059_x_at	142.387	121.637	100.423	167.918	150.516	127.689	-0.00266774	-0.268994	-0.419779	0.747539	0.262108	0.0973817	-0.056889	0.961335	0	NM_028242	Htatsf1	HIV TAT specific factor 1	72459	chrX A4	0006350 // transcription // inferred from electronic annotation /// 0006355 // regulation of transcription, DNA-dependent // inferred from electronic annotation
1454905_at	380.024	320.423	639.723	345.502	333.97	379.671	-0.000758891	-0.232875	0.838238	1.78786	-0.11346	-0.16852	0.0991614	1.07115	3	NM_001081282	Ibtk	inhibitor of Bruton agammaglobulinemia tyrosine kinase	108837	chr9 E3.1	0001933 // negative regulation of protein amino acid phosphorylation // not recorded /// 0051209 // release of sequestered calcium ion into cytosol // not recorded
1428967_at	406.577	260.596	271.452	324.411	311.515	130.36	-0.0014263	-0.641744	-0.495543	0.709295	-0.30151	-0.367543	-1.54671	0.34229	2	NM_010513	Igf1r	insulin-like growth factor I receptor	16001	chr7 D1|7 33.0 cM	0006468 // protein amino acid phosphorylation // inferred from direct assay /// 0006468 // protein amino acid phosphorylation // inferred from electronic annotation /// 0006955 // immune response // inferred from electronic annotation /// 0007169 // transmembrane receptor protein tyrosine kinase signaling pathway // inferred from electronic annotation /// 0007420 // brain development // inferred …
1419192_at	156.196	150.806	1020.49	123.762	132.201	423.987	-0.0271885	-0.0583653	2.79357	6.93342	-0.312491	-0.230063	1.5301	2.88806	0	NM_010215	Il4i1	interleukin 4 induced 1	14204	chr7 B4|7 23.1 cM	0009072 // aromatic amino acid family metabolic process // inferred from direct assay /// 0032313 // regulation of Rab GTPase activity // inferred from electronic annotation /// 0055114 // oxidation reduction // inferred from electronic annotation
1418697_at	19033.5	16816.8	3502.26	20043.4	19192.6	7547.09	-0.000299344	-0.161282	-2.3718	0.193204	0.0990398	0.0323617	-1.23859	0.423786	1	NM_009349	Inmt	indolethylamine N-methyltransferase	21743	chr6 B3
1441416_at	31.7094	33.3313	65.2269	26.3979	28.0465	34.6358	-0.0139288	0.090252	1.12205	2.17657	-0.241009	-0.157355	0.229999	1.17283	0	NM_001024617	Inpp4b	inositol polyphosphate-4-phosphatase, type II	234515	chr8 C2|8 38.0 cM	0048016 // inositol phosphate-mediated signaling // not recorded
1456412_a_at	1163.61	1001.81	740.176	1341.61	1228.32	969.085	-0.00183177	-0.19864	-0.571405	0.672961	0.229509	0.0965395	-0.160879	0.89448	0	NM_008916	Inpp5k	inositol polyphosphate 5-phosphatase K	19062	chr11 B5|11 44.12 cM
1415977_at	811.401	733.81	1518.97	654.875	708.004	1056.21	-0.00498083	-0.132012	0.991385	1.98809	-0.29009	-0.17726	0.483843	1.39846	3	NM_023627	Isyna1	myo-inositol 1-phosphate synthase A1	71780	chr8 B3.3	0006021 // inositol biosynthetic process // inferred from electronic annotation /// 0008152 // metabolic process // inferred from electronic annotation /// 0008654 // phospholipid biosynthetic process // inferred from electronic annotation
1456498_at	118.405	118.792	38.7912	312.627	297.243	119.903	-0.0761557	-0.035039	-1.66527	0.315286	1.42149	1.34339	0.0737244	1.05243	0	NM_010576	Itga4	integrin alpha 4	16401	chr2 C3|2 46.0 cM	0001974 // blood vessel remodeling // inferred from mutant phenotype /// 0007155 // cell adhesion // inferred from mutant phenotype /// 0007155 // cell adhesion // inferred from electronic annotation /// 0007157 // heterophilic cell adhesion // inferred from mutant phenotype /// 0007159 // leukocyte adhesion // inferred from mutant phenotype /// 0007229 // integrin-mediated signaling pathway // i…	Integrin-mediated_cell_adhesion_KEGG // GenMAPP
1456097_a_at	100.495	110.686	128.396	129.415	130.376	165.566	-0.00106279	0.124484	0.437864	1.3546	0.386033	0.389647	0.82283	1.76887	1	NM_026348	Itgb3bp	integrin beta 3 binding protein (beta3-endonexin)	67733	chr4 C6	0006350 // transcription // inferred from electronic annotation /// 0006355 // regulation of transcription, DNA-dependent // inferred from electronic annotation /// 0006915 // apoptosis // inferred from electronic annotation /// 0007229 // integrin-mediated signaling pathway // inferred from electronic annotation
1460203_at	1303.8	1161.54	1152.25	1171.39	1060.21	914.046	-0.00120939	-0.149154	-0.0917706	0.93837	-0.130371	-0.279089	-0.409412	0.75293	0	NM_010585	Itpr1	inositol 1,4,5-triphosphate receptor 1	16438	chr6 E1-E2|6 48.0 cM	0001666 // response to hypoxia // inferred from direct assay /// 0006810 // transport // inferred from electronic annotation /// 0006811 // ion transport // inferred from electronic annotation /// 0006816 // calcium ion transport // inferred from direct assay /// 0006816 // calcium ion transport // inferred from electronic annotation /// 0009791 // post-embryonic development // inferred from muta…	Calcium_regulation_in_cardiac_cells // GenMAPP /// G_Protein_Signaling // GenMAPP /// Smooth_muscle_contraction // GenMAPP
1439878_at	24.6503	29.0314	234.557	26.1317	25.1436	66.8839	-0.000200461	0.251344	3.33494	10.0906	0.0994624	0.048792	1.54211	2.91221	0	NM_008412	Ivl	involucrin	16447	chr3 F1|3 45.2 cM	0030216 // keratinocyte differentiation // inferred from electronic annotation /// 0031424 // keratinization // inferred from electronic annotation
1450747_at	390.414	346.52	446.185	322.863	369.404	310.946	-0.000349748	-0.15391	0.277853	1.21239	-0.254282	-0.0596691	-0.224977	0.855609	0	NM_001110305 /// NM_001110306 /// NM_001110307 /// NM_016679	Keap1	kelch-like ECH-associated protein 1	50868	chr9 A3	0001701 // in utero embryonic development // inferred from mutant phenotype /// 0006350 // transcription // inferred from electronic annotation /// 0006355 // regulation of transcription, DNA-dependent // inferred from electronic annotation /// 0045449 // regulation of transcription // inferred from mutant phenotype /// 0045604 // regulation of epidermal cell differentiation // inferred from muta…
1448269_a_at	526.287	551.963	1281.16	483.101	478.557	544.478	-0.00637471	0.0826372	1.37063	2.58584	-0.104681	-0.128564	0.152608	1.11158	0	NM_026167	Klhl13	kelch-like 13 (Drosophila)	67455	chrX A2	0019941 // modification-dependent protein catabolic process // inferred from electronic annotation
1455434_a_at	1118.35	972.928	813.869	1243.22	1075.88	907.583	-0.000233147	-0.198074	-0.372095	0.77266	0.177791	-0.0361218	-0.198783	0.871285	2	NM_008477	Ktn1	kinectin 1	16709	chr14 C2	0007018 // microtubule-based movement // traceable author statement
1418449_at	154.012	145.635	736.148	111.232	127.605	478.647	-0.0118554	-0.0889261	2.34312	5.07399	-0.455366	-0.252426	1.74069	3.34195	0	NM_133664	Lad1	ladinin	16763	chr1 E4
1434597_at	2291.59	2089.68	2663.42	1885.06	1977.53	2169.01	-0.00136065	-0.113545	0.303565	1.23419	-0.25639	-0.192811	0.0244584	1.0171	2	NM_172585	Larp5	La ribonucleoprotein domain family, member 5	217980	chr13 A1|13 5.0 cM
1452266_at	621.182	608.639	1852.4	624.168	591.547	1111.47	-0.00312216	-0.00938339	1.65828	3.15641	0.0308948	-0.0499197	0.941411	1.92041	0	NM_152822	Las1l	LAS1-like (S. cerevisiae)	76130	chrX C3
1455293_at	264.617	253.056	351.84	188.143	177.257	238.474	-0.00886542	-0.0452708	0.495127	1.40944	-0.47387	-0.560042	-0.0481752	0.967159	3	NM_001039522	Leo1	Leo1, Paf1/RNA polymerase II complex component, homolog (S. cerevisiae)	235497	chr9 D	0006350 // transcription // inferred from electronic annotation /// 0006355 // regulation of transcription, DNA-dependent // inferred from electronic annotation
1422662_at	822.759	790.239	1028.6	1057.93	1084.34	1197.58	-0.00122669	-0.0437637	0.40846	1.32727	0.385676	0.418143	0.643093	1.56167	0	NM_018886	Lgals8	lectin, galactose binding, soluble 8	56048	chr13 A1|13 8.0 cM	0006816 // calcium ion transport // inferred from electronic annotation /// 0007154 // cell communication // inferred from electronic annotation
1450872_s_at	1333.95	1337.96	1620.33	1190.41	1179.2	1202.6	-0.000957049	0.0219574	0.366322	1.28906	-0.140768	-0.159552	-0.0483355	0.967051	1	NM_001111100 /// NM_021460	Lipa	lysosomal acid lipase A	16889	chr19 C1	0000902 // cell morphogenesis // inferred from mutant phenotype /// 0001816 // cytokine production // inferred from mutant phenotype /// 0006629 // lipid metabolic process // inferred from electronic annotation /// 0006954 // inflammatory response // inferred from mutant phenotype /// 0008283 // cell proliferation // inferred from mutant phenotype /// 0016042 // lipid catabolic process // inferre…
1457026_at	655.363	514.157	964.77	410.981	403.369	712.222	-0.00283441	-0.329965	0.643163	1.56175	-0.648768	-0.694726	0.218824	1.16378	3	NM_001083894 /// NM_153404	Liph	lipase, member H	239759	chr16 B1|16 14.8 cM	0006629 // lipid metabolic process // inferred from electronic annotation /// 0016042 // lipid catabolic process // inferred from electronic annotation	Statin_Pathway_PharmGKB // GenMAPP
1454086_a_at	1957.9	2009.31	582.337	2518.3	2486.75	1007.19	-0.000464869	0.0562731	-1.66484	0.315379	0.385599	0.361651	-0.858375	0.551574	0	NM_001142335 /// NM_001142336 /// NM_001142337 /// NM_008505 /// XM_001479884	Lmo2	LIM domain only 2	16909	chr2 E2|2 60.0 cM	0045647 // negative regulation of erythrocyte differentiation // inferred from mutant phenotype
1448786_at	1155.52	1120.95	1740.2	783.571	990.127	1069.95	-0.00581197	-0.0247888	0.67827	1.60022	-0.537172	-0.203329	-0.00723207	0.995	0	NM_025806 /// XM_001473518	LOC100045163 /// Plbd1	similar to RIKEN cDNA 1100001H23 gene /// phospholipase B domain containing 1	100045163 /// 66857	chr6 G1	0016042 // lipid catabolic process // inferred from electronic annotation
1418932_at	103.701	96.6495	339.144	59.2831	60.6538	115.184	-0.0337506	-0.115339	1.77954	3.43316	-0.785865	-0.753785	0.249358	1.18868	0	NM_017373 /// XM_001475817	LOC100046232 /// Nfil3	similar to NFIL3/E4BP4 transcription factor /// nuclear factor, interleukin 3, regulated	100046232 /// 18030	chr13 B1|13 32.0 cM	0006350 // transcription // inferred from electronic annotation /// 0006355 // regulation of transcription, DNA-dependent // inferred from electronic annotation /// 0048511 // rhythmic process // inferred from electronic annotation
1452226_at	246.861	252.358	608.802	240.886	250.074	457.328	-0.00135379	0.0366005	1.38869	2.61841	-0.0125852	0.036536	0.988815	1.98455	3	NM_173867 /// XM_001477942	LOC100047340 /// Rcc2	hypothetical protein LOC100047340 /// regulator of chromosome condensation 2	100047340 /// 108911	chr4 D3	0007049 // cell cycle // inferred from electronic annotation /// 0007067 // mitosis // inferred from electronic annotation /// 0051301 // cell division // inferred from electronic annotation
1448791_at	1198.74	1203.15	1539.84	1561.3	1625.93	2299.91	-0.0110646	0.0168199	0.446389	1.36263	0.403076	0.458782	1.04165	2.05858	1	NM_024225 /// XM_001480782	LOC100048642 /// Snx5	similar to Snx5 protein /// sorting nexin 5	100048642 /// 69178	chr2 H1|2 80.0 cM	0006810 // transport // inferred from electronic annotation /// 0007154 // cell communication // inferred from electronic annotation /// 0015031 // protein transport // inferred from electronic annotation
1421816_at	401.059	370.355	607.904	288.289	293.028	429.525	-0.000671982	-0.0960743	0.684636	1.6073	-0.452251	-0.432499	0.199298	1.14814	0	XM_904332	LOC630729	similar to Glutathione reductase, mitochondrial precursor (GR) (GRase)	630729		0006749 // glutathione metabolic process // inferred by curator /// 0006749 // glutathione metabolic process // inferred from electronic annotation /// 0045454 // cell redox homeostasis // inferred from electronic annotation /// 0055114 // oxidation reduction // inferred from electronic annotation
1415922_s_at	278.251	274.27	1274.42	257.482	320.54	763.063	-0.000282522	-0.0477257	2.28124	4.86095	-0.0952975	0.222215	1.54765	2.9234	0	NM_010807	Marcksl1	MARCKS-like 1	17357	chr4 D2.2|4 59.0 cM	0008284 // positive regulation of cell proliferation // inferred from direct assay
1437226_x_at	499.371	519.718	1641.25	435.469	546.138	1068.75	-0.000366749	0.0688934	1.79962	3.48129	-0.177228	0.146868	1.19655	2.29191	0	NM_010807	Marcksl1	MARCKS-like 1	17357	chr4 D2.2|4 59.0 cM	0008284 // positive regulation of cell proliferation // inferred from direct assay
1421903_at	177.988	180.331	268.634	172.931	184.372	199.937	-0.000144102	0.0374877	0.680194	1.60235	-0.0211866	0.0701493	0.271152	1.20677	0	NM_026042	Med29	mediator complex subunit 29	67224	chr7 A3	0006350 // transcription // inferred from electronic annotation /// 0006355 // regulation of transcription, DNA-dependent // inferred from electronic annotation
1447861_x_at	99.5494	128.625	63.4245	127.623	134.684	101.746	-0.00170037	0.387589	-0.569854	0.673685	0.382748	0.4553	0.129591	1.09398	0	NM_001136072 /// NM_001159567 /// NM_001159568 /// NM_001159569 /// NM_001159570 /// NM_010825	Meis2	Meis homeobox 2	17536	chr2 E4-E5|2 64.0 cM	0001654 // eye development // inferred from genetic interaction /// 0006355 // regulation of transcription, DNA-dependent // inferred from electronic annotation /// 0045449 // regulation of transcription // inferred from electronic annotation /// 0045944 // positive regulation of transcription from RNA polymerase II promoter // inferred from genetic interaction
1416980_at	46.556	53.6281	86.1298	43.2839	45.7179	50.0571	-0.00585799	0.188173	0.971982	1.96153	-0.0854456	-0.0108286	0.20302	1.15111	2	NM_027853	Mettl7b	methyltransferase like 7B	71664	chr10 D3	0008152 // metabolic process // inferred from electronic annotation
1434436_at	99.5574	84.8884	268.661	89.8235	73.4753	107.649	-0.00948363	-0.234628	1.51308	2.85418	-0.145035	-0.444538	0.213336	1.15937	0	NM_029413	Morc4	microrchidia 4	75746	chrX F1
1448799_s_at	793.014	820.887	1194.58	749.258	760.751	925.5	-0.00340967	0.0683675	0.678154	1.60009	-0.057759	-0.0392987	0.326367	1.25385	0	NM_011885	Mrps12	mitochondrial ribosomal protein S12	24030	chr7 A3	0006412 // translation // inferred from electronic annotation	Apoptosis // GenMAPP
1424433_at	361.503	380.638	654.579	322.726	335.819	427.926	-0.00408443	0.0927376	0.94387	1.92368	-0.138925	-0.088126	0.34525	1.27037	0	NM_029619	Msrb2	methionine sulfoxide reductase B2	76467	chr2 A2	0030091 // protein repair // inferred from direct assay /// 0055114 // oxidation reduction // inferred from electronic annotation
1451346_at	244.565	255.643	523.913	256.175	271.705	397.819	-0.00130776	0.0761502	1.18548	2.27438	0.0922877	0.171036	0.804318	1.74632	0	NM_024433	Mtap	methylthioadenosine phosphorylase	66902	chr4 C4	0009116 // nucleoside metabolic process // inferred from electronic annotation
1424426_at	249.076	227.091	516.562	256.274	257.772	342.813	-0.00148343	-0.117863	1.13766	2.20024	0.0622902	0.0700359	0.564152	1.47852	3	NM_024433	Mtap	methylthioadenosine phosphorylase	66902	chr4 C4	0009116 // nucleoside metabolic process // inferred from electronic annotation
1427398_at	71.8343	59.8301	188.484	36.4488	48.0071	102.252	-0.0469239	-0.270261	1.47015	2.77051	-0.957699	-0.560469	0.613726	1.53021	0	NM_080457	Muc4	mucin 4	140474	chr16 B3	0007155 // cell adhesion // inferred from electronic annotation /// 0007160 // cell-matrix adhesion // inferred from electronic annotation
1417773_at	555.918	592.201	1066	491.962	555.016	772.777	-0.00324431	0.107584	1.0261	2.03652	-0.153642	0.0147001	0.576721	1.49146	0	NM_053179	Nans	N-acetylneuraminic acid synthase (sialic acid synthase)	94181	chr4 B2	0008152 // metabolic process // inferred from electronic annotation /// 0016051 // carbohydrate biosynthetic process // inferred from electronic annotation
1417774_at	251.135	225.36	477.498	206.612	224.227	330.258	-0.004625	-0.149471	1.01317	2.01834	-0.26314	-0.142693	0.498205	1.41246	3	NM_053179	Nans	N-acetylneuraminic acid synthase (sialic acid synthase)	94181	chr4 B2	0008152 // metabolic process // inferred from electronic annotation /// 0016051 // carbohydrate biosynthetic process // inferred from electronic annotation
1416494_at	1611	1636.65	1810.6	820.656	757.195	780.973	-0.00266349	0.0370986	0.255142	1.19345	-0.948941	-1.06874	-0.945132	0.519382	0	NM_001030274	Ndufs5	NADH dehydrogenase (ubiquinone) Fe-S protein 5	595136	chr4 D2	0006810 // transport // inferred from electronic annotation /// 0022900 // electron transport chain // inferred from electronic annotation /// 0032981 // mitochondrial respiratory chain complex I assembly // inferred from electronic annotation
1423596_at	348.045	456.878	1562.93	333.196	436.02	1270.39	-0.00166416	0.410153	2.2541	4.77037	-0.0451047	0.345411	1.97132	3.92125	2	NM_001159631 /// NM_021606	Nek6	NIMA (never in mitosis gene a)-related expressed kinase 6	59126	chr2 B|2 28.0 cM	0006468 // protein amino acid phosphorylation // inferred from electronic annotation /// 0006468 // protein amino acid phosphorylation // inferred from sequence or structural similarity /// 0006915 // apoptosis // inferred from electronic annotation /// 0007049 // cell cycle // inferred from electronic annotation /// 0007059 // chromosome segregation // inferred from electronic annotation /// 000…
1448465_at	316.959	374.91	874.065	299.929	336.652	574.102	-0.000839298	0.255804	1.54883	2.9258	-0.0570609	0.104438	0.959573	1.94473	2	NM_008698	Nipsnap1	4-nitrophenylphosphatase domain and non-neuronal SNAP25-like protein homolog 1 (C. elegans)	18082	chr11 A1
1451503_at	267.737	311.895	359.158	310.749	334.566	254.556	-0.00108254	0.236455	0.510784	1.42482	0.240199	0.342185	0.0297071	1.0208	0	NM_030152	Nol3	nucleolar protein 3 (apoptosis repressor with CARD domain)	78688	chr8 D1|8 51.0 cM	0001666 // response to hypoxia // inferred from electronic annotation /// 0006397 // mRNA processing // inferred from electronic annotation /// 0008380 // RNA splicing // inferred from electronic annotation /// 0042981 // regulation of apoptosis // inferred from electronic annotation
1425151_a_at	208.738	222.546	950.986	155.623	184.458	412.546	-0.00441982	0.10344	2.26374	4.80234	-0.408621	-0.157012	1.08444	2.12056	0	NM_027988	Noxo1	NADPH oxidase organizer 1	71893	chr17 A3.3|17 10.0 cM	0006801 // superoxide metabolic process // inferred from direct assay /// 0007154 // cell communication // inferred from electronic annotation
1417385_at	573.411	467.068	748.951	475.637	556.11	487.93	-0.000292197	-0.277204	0.472265	1.38729	-0.24919	-0.0249492	-0.134229	0.911156	3	NM_008942	Npepps	aminopeptidase puromycin sensitive	19155	chr11 D|11 56.0 cM	0006508 // proteolysis // inferred from electronic annotation
1452106_at	6351.51	5912.96	2053.66	6928.71	7548.62	3863.69	-9.21407e-05	-0.0837472	-1.5517	0.341108	0.14811	0.267847	-0.617367	0.651859	0	NM_001029836 /// NM_033525	Npnt	nephronectin	114249	chr3 G3	0001657 // ureteric bud development // inferred from mutant phenotype /// 0001658 // ureteric bud branching // inferred from mutant phenotype /// 0007155 // cell adhesion // inferred from electronic annotation /// 0007160 // cell-matrix adhesion // inferred from direct assay /// 0007160 // cell-matrix adhesion // inferred from physical interaction /// 0007275 // multicellular organismal developme…
1449716_s_at	471.665	395.037	344.161	188.675	187.056	166.051	-0.00593287	-0.251346	-0.371792	0.772822	-1.29961	-1.31529	-1.40463	0.377716	0	NM_146150	Nrd1	nardilysin, N-arginine dibasic convertase, NRD convertase 1	230598	chr4 C7	0006508 // proteolysis // inferred from electronic annotation
1433788_at	27.2738	30.4395	30.394	32.5275	31.0946	35.8769	-0.00171062	0.176958	0.243508	1.18387	0.277848	0.207748	0.499054	1.41329	0	NM_172544	Nrxn3	neurexin III	18191	chr12D2|12 45.0 cM	0007268 // synaptic transmission // inferred from genetic interaction /// 0007269 // neurotransmitter secretion // inferred from genetic interaction /// 0007416 // synaptogenesis // inferred from genetic interaction
1426447_at	419.411	409.695	459.522	327.168	368.246	315.653	-0.000669257	-0.0166776	0.218084	1.16319	-0.333608	-0.169398	-0.309855	0.806723	2	NM_027091	Nup35	nucleoporin 35	69482	chr2 C3	0006810 // transport // inferred from electronic annotation /// 0015031 // protein transport // inferred from electronic annotation /// 0051028 // mRNA transport // inferred from electronic annotation /// 0065002 // intracellular protein transmembrane transport // inferred from electronic annotation
1428073_a_at	1081.1	979.511	1333.68	971.107	1006.25	1085.67	-0.000622455	-0.123006	0.387635	1.30825	-0.130041	-0.0855682	0.109432	1.0788	3	NM_001083331 /// NM_172394	Nup88	nucleoporin 88	19069	chr11 B4|11 42.0 cM	0006810 // transport // inferred from electronic annotation /// 0015031 // protein transport // inferred from electronic annotation /// 0051028 // mRNA transport // inferred from electronic annotation /// 0065002 // intracellular protein transmembrane transport // inferred from electronic annotation
1419663_at	6699.53	6267.14	590.476	7946.62	6821.71	1507.49	-0.0035764	-0.0842622	-3.41972	0.0934459	0.270752	0.0441885	-2.06337	0.239256	3	NM_008760	Ogn	osteoglycin	18295	chr13 A5
1455663_at	155.895	177.288	49.2439	193.749	182.199	82.5559	-0.00424493	0.199792	-1.58193	0.334034	0.334375	0.243749	-0.814453	0.568624	0	NM_172907	Olfml1	olfactomedin-like 1	244198	chr7 E3
1424990_at	884.4	809.999	1225.84	776.832	902.736	957.243	-0.000990115	-0.109366	0.558126	1.47236	-0.162425	0.0501325	0.217312	1.16257	0	NM_175423	Orai1	ORAI calcium release-activated calcium modulator 1	109305	chr5 F	0006810 // transport // inferred from electronic annotation /// 0006811 // ion transport // inferred from electronic annotation /// 0006816 // calcium ion transport // inferred from electronic annotation /// 0006955 // immune response // inferred from electronic annotation /// 0051928 // positive regulation of calcium ion transport // inferred from electronic annotation /// 0051928 // positive re…
1434763_at	111.367	93.7127	148.216	92.5793	108.183	92.7602	-0.00483128	-0.274449	0.491996	1.40639	-0.242369	-0.0208391	-0.159876	0.895102	0	NM_178751	Orai2	ORAI calcium release-activated calcium modulator 2	269717	chr5 G2
1424022_at	350.96	335.106	804.018	221.994	229.294	501.408	-0.000887434	-0.0489758	1.27794	2.42493	-0.636171	-0.596021	0.617742	1.53447	3	NM_027950	Osgin1	oxidative stress induced growth inhibitor 1	71839	chr8 E1
1443939_at	306.485	289.782	207.823	491.891	535.272	251.476	-0.00806267	-0.0671247	-0.474294	0.719819	0.70668	0.816735	-0.185828	0.879144	0	NM_001085549 /// XM_981216	OTTMUSG00000008561	predicted gene, OTTMUSG00000008561	666048	chr4 D1|4
1439849_at	188.471	164.668	157.468	302.921	291.099	205.511	-0.00248127	-0.17844	-0.192059	0.875355	0.704903	0.646293	0.227956	1.17117	3	NM_001085549 /// XM_981216	OTTMUSG00000008561	predicted gene, OTTMUSG00000008561	666048	chr4 D1|4
1452620_at	87.3667	82.6541	251.69	82.2454	88.1462	155.746	-0.000321072	-0.110699	1.61287	3.05859	-0.0648692	0.0322114	0.934078	1.91067	2	NM_028994	Pck2	phosphoenolpyruvate carboxykinase 2 (mitochondrial)	74551	chr14 C1|14 21.0 cM	0006094 // gluconeogenesis // inferred from electronic annotation
1425615_a_at	597.68	611.572	1897.33	570.096	619.141	1223.19	-0.00126749	0.0494671	1.75038	3.36446	-0.0456769	0.0710908	1.13478	2.19585	3	NM_028994	Pck2	phosphoenolpyruvate carboxykinase 2 (mitochondrial)	74551	chr14 C1|14 21.0 cM	0006094 // gluconeogenesis // inferred from electronic annotation
1449187_at	934.736	936.273	524.073	1095.31	1258.28	748.652	-0.000312551	0.0125324	-0.75004	0.594587	0.252781	0.449007	-0.218098	0.859698	0	NM_008808	Pdgfa	platelet derived growth factor, alpha	18590	chr5 G2|5 82.0 cM	0001525 // angiogenesis // inferred from direct assay /// 0001666 // response to hypoxia // inferred from electronic annotation /// 0001942 // hair follicle development // inferred from mutant phenotype /// 0002053 // positive regulation of mesenchymal cell proliferation // inferred from mutant phenotype /// 0007179 // transforming growth factor beta receptor signaling pathway // inferred from el…
1418209_a_at	932.335	740.852	327.783	671.309	763.39	246.809	-0.00102293	-0.333834	-1.42102	0.373449	-0.453764	-0.267929	-1.81412	0.284378	2	NM_019410	Pfn2	profilin 2	18645	chr3 D|3 29.3 cM	0007010 // cytoskeleton organization // inferred from electronic annotation /// 0030036 // actin cytoskeleton organization // inferred from electronic annotation
1423706_a_at	1091.27	1140.16	1854.73	898.332	874.194	1362.69	-0.00107453	0.0831604	0.851413	1.80427	-0.275275	-0.300191	0.423717	1.34138	3	NM_001081274	Pgd	phosphogluconate dehydrogenase	110208	chr4 E2|4 77.6 cM	0006098 // pentose-phosphate shunt // inferred from electronic annotation /// 0008152 // metabolic process // inferred from electronic annotation /// 0009051 // pentose-phosphate shunt, oxidative branch // inferred from electronic annotation /// 0019322 // pentose biosynthetic process // inferred from direct assay /// 0055114 // oxidation reduction // inferred from electronic annotation	Pentose_Phosphate_Pathway // GenMAPP
1449184_at	608.395	447.71	2191.4	255.316	326.258	1035.48	-0.173749	-0.511659	1.93743	3.83022	-1.2253	-0.882165	0.873739	1.83241	0	NM_009402	Pglyrp1	peptidoglycan recognition protein 1	21946	chr7 A3	0006915 // apoptosis // inferred from electronic annotation /// 0006955 // immune response // inferred from electronic annotation /// 0009253 // peptidoglycan catabolic process // inferred from electronic annotation /// 0016045 // detection of bacterium // inferred from electronic annotation /// 0042742 // defense response to bacterium // inferred from electronic annotation /// 0050830 // defense…
1426753_at	419.349	368.822	554.773	360.422	327.097	379.054	-0.000449101	-0.167694	0.487212	1.40173	-0.195062	-0.342942	-0.0444716	0.969645	2	NM_001130184 /// NM_001130185 /// NM_001130186 /// NM_172303	Phf17	PHD finger protein 17	269424	chr3 B	0006350 // transcription // inferred from electronic annotation /// 0006355 // regulation of transcription, DNA-dependent // inferred from electronic annotation /// 0006915 // apoptosis // inferred from electronic annotation
1422707_at	293.738	292.285	417.338	271.473	293.911	279.952	-0.000965918	0.0122666	0.592231	1.50758	-0.0932055	0.0169785	0.0329861	1.02313	1	NM_001146200 /// NM_001146201 /// NM_020272	Pik3cg	phosphoinositide-3-kinase, catalytic, gamma polypeptide	30955	chr12 B	0006468 // protein amino acid phosphorylation // inferred from direct assay /// 0043066 // negative regulation of apoptosis // inferred from direct assay /// 0046854 // phosphoinositide phosphorylation // inferred from electronic annotation /// 0048015 // phosphoinositide-mediated signaling // inferred from electronic annotation
1449488_at	56.3848	95.6768	66.1627	63.0165	65.6216	77.2477	-0.00158063	0.570832	0.316965	1.24571	0.185415	0.235827	0.5576	1.47182	0	NM_011097	Pitx1	paired-like homeodomain transcription factor 1	18740	chr13 B1|13 34.0 cM	0001501 // skeletal system development // inferred from mutant phenotype /// 0006350 // transcription // inferred from electronic annotation /// 0006355 // regulation of transcription, DNA-dependent // inferred from electronic annotation /// 0007275 // multicellular organismal development // inferred from electronic annotation /// 0014707 // branchiomeric skeletal muscle development // inferred f…
1421137_a_at	55.3448	62.0241	327.346	60.3802	79.7438	484.469	-0.00894684	0.0853577	2.64915	6.27296	0.147067	0.524673	3.22963	9.38027	0	NM_001039050 /// NM_001039051 /// NM_001039052 /// NM_001039053 /// NM_008863	Pkib	protein kinase inhibitor beta, cAMP dependent, testis specific	18768	chr10 B4|10 30.0 cM	0006469 // negative regulation of protein kinase activity // inferred from electronic annotation	Calcium_regulation_in_cardiac_cells // GenMAPP /// Smooth_muscle_contraction // GenMAPP
1430700_a_at	416.779	334.627	862.476	279.836	320.948	416.042	-0.00925886	-0.299209	1.12272	2.17758	-0.55269	-0.374214	0.0957611	1.06863	0	NM_013737	Pla2g7	phospholipase A2, group VII (platelet-activating factor acetylhydrolase, plasma)	27226	chr17 C	0006954 // inflammatory response // traceable author statement /// 0016042 // lipid catabolic process // inferred from electronic annotation
1435043_at	990.729	803.864	236.348	1090.71	902.737	372.272	-0.000474511	-0.30043	-1.98882	0.251945	0.163413	-0.113627	-1.31274	0.402556	1	NM_001145830 /// NM_019677	Plcb1	phospholipase C, beta 1	18795	chr2 F3|2 76.7 cM	0006629 // lipid metabolic process // inferred from electronic annotation /// 0007165 // signal transduction // inferred from electronic annotation /// 0007242 // intracellular signaling cascade // inferred from electronic annotation /// 0016042 // lipid catabolic process // inferred from electronic annotation
1452398_at	861.106	749.351	167.109	1056.09	944.602	300.684	-0.000580764	-0.201519	-2.28881	0.204644	0.318611	0.151947	-1.41606	0.374735	1	NM_019588	Plce1	phospholipase C, epsilon 1	74055	chr19 D1	0000187 // activation of MAPK activity // inferred from electronic annotation /// 0000187 // activation of MAPK activity // inferred from sequence or structural similarity /// 0006629 // lipid metabolic process // inferred from electronic annotation /// 0007165 // signal transduction // inferred from electronic annotation /// 0007200 // activation of phospholipase C activity by G-protein coupled …
1457157_at	60.1938	53.695	83.8097	52.9696	52.3269	41.6145	-0.000353967	-0.157658	0.562699	1.47703	-0.179411	-0.198775	-0.431084	0.741704	0	NM_183191	Plch1	phospholipase C, eta 1	269437	chr3 E1	0006629 // lipid metabolic process // inferred from electronic annotation /// 0007165 // signal transduction // inferred from electronic annotation /// 0007242 // intracellular signaling cascade // inferred from electronic annotation /// 0016042 // lipid catabolic process // inferred from electronic annotation /// 0048015 // phosphoinositide-mediated signaling // not recorded
1436821_at	138.717	108.404	35.8176	213.433	194.853	58.129	-0.00710806	-0.524074	-1.86887	0.273788	0.645733	0.507341	-1.15839	0.448012	0	NM_177355	Plcxd3	phosphatidylinositol-specific phospholipase C, X domain containing 3	239318	chr15 A1	0006629 // lipid metabolic process // inferred from electronic annotation /// 0007165 // signal transduction // inferred from electronic annotation /// 0007242 // intracellular signaling cascade // inferred from electronic annotation /// 0016042 // lipid catabolic process // inferred from electronic annotation
1441371_at	162.553	179.311	336.705	166.649	181.706	243.211	-5.44724e-05	0.156088	1.13606	2.1978	0.0580389	0.180551	0.683575	1.60611	0	NM_175750	Plxna4	plexin A4	243743	chr6 B1	0007165 // signal transduction // inferred from genetic interaction /// 0007165 // signal transduction // inferred from electronic annotation /// 0007275 // multicellular organismal development // inferred from electronic annotation /// 0007399 // nervous system development // inferred from genetic interaction
1450727_a_at	296.538	551.121	1122.17	528.368	561.131	960.427	-0.0173798	0.914566	2.00827	4.023	0.857054	0.939482	1.79997	3.48214	3	NM_026389	Poldip2	polymerase (DNA-directed), delta interacting protein 2	67811	chr11 B5
1417041_at	633.589	686.291	1486.71	592.266	607.075	1233.44	-0.000334434	0.134248	1.31735	2.49208	-0.072306	-0.0420325	1.06413	2.09091	0	NM_009085	Polr1c	polymerase (RNA) I polypeptide C	20016	chr17 C	0006350 // transcription // inferred from electronic annotation	RNA_transcription_Reactome // GenMAPP
1439075_at	197.263	163.348	145.404	339.652	274.223	220.563	-0.00919517	-0.276683	-0.355819	0.781426	0.799206	0.491118	0.259712	1.19724	0	NM_029763	Polr3f	polymerase (RNA) III (DNA directed) polypeptide F	70408	chr2 H1	0006350 // transcription // inferred from electronic annotation
1422753_a_at	198.84	210.093	293.934	161.111	179.917	203.727	-0.000434104	0.0872866	0.650599	1.56982	-0.287157	-0.126109	0.133955	1.0973	0	NM_025901	Polr3k	polymerase (RNA) III (DNA directed) polypeptide K	67005	chr2 H4	0006350 // transcription // inferred from electronic annotation /// 0045449 // regulation of transcription // inferred from electronic annotation	RNA_transcription_Reactome // GenMAPP
1451210_at	528.775	599.168	2094.26	491.286	558.797	1390.48	-0.00226718	0.199639	2.07289	4.20729	-0.0810804	0.0998482	1.49815	2.82481	0	NM_015817	Ppap2c	phosphatidic acid phosphatase type 2C	50784	chr10 C1|10 42.0 cM
1434475_at	275.84	181.648	171.001	216.347	242.404	139.915	-0.00220903	-0.618903	-0.605154	0.657401	-0.326758	-0.173713	-0.879032	0.543732	3	NM_001081086	Ppig	peptidyl-prolyl isomerase G (cyclophilin G)	228005	chr2 C2	0006457 // protein folding // inferred from electronic annotation
1431506_s_at	508.593	450.927	595.519	224.063	240.474	274.099	-0.00172132	-0.156766	0.310499	1.24014	-1.1621	-1.06683	-0.792242	0.577446	0	NM_001110129 /// NM_001110130 /// NM_028677	Ppih	peptidyl prolyl isomerase H	66101	chr4 D	0006397 // mRNA processing // inferred from electronic annotation /// 0006457 // protein folding // inferred from electronic annotation /// 0008380 // RNA splicing // inferred from electronic annotation
1450914_at	891.059	975.358	2413.75	852.255	906.938	1768.31	-0.00300862	0.148421	1.52272	2.87331	-0.0432871	0.0455314	1.09153	2.13101	0	NM_008889	Ppp1r14b	protein phosphatase 1, regulatory (inhibitor) subunit 14B	18938	chr19 A	0042325 // regulation of phosphorylation // inferred from electronic annotation	mRNA_processing_binding_Reactome // GenMAPP
1422467_at	1617.24	1670.33	1576.15	1701.64	1881	2267.13	-0.00243877	0.0606242	0.0490705	1.0346	0.0937377	0.235034	0.589403	1.50462	0	NM_008917	Ppt1	palmitoyl-protein thioesterase 1	19063	chr4 D1-D3|4 59.1 cM	0002084 // protein depalmitoylation // inferred from mutant phenotype /// 0002084 // protein depalmitoylation // inferred from sequence or structural similarity /// 0006309 // DNA fragmentation involved in apoptosis // inferred from sequence or structural similarity /// 0006464 // protein modification process // inferred from electronic annotation /// 0006898 // receptor-mediated endocytosis // n…
1422468_at	773.632	798.87	1011.87	833.217	952.726	1594.6	-0.0052194	0.0574564	0.471985	1.38702	0.125619	0.318942	1.14548	2.2122	3	NM_008917	Ppt1	palmitoyl-protein thioesterase 1	19063	chr4 D1-D3|4 59.1 cM	0002084 // protein depalmitoylation // inferred from mutant phenotype /// 0002084 // protein depalmitoylation // inferred from sequence or structural similarity /// 0006309 // DNA fragmentation involved in apoptosis // inferred from sequence or structural similarity /// 0006464 // protein modification process // inferred from electronic annotation /// 0006898 // receptor-mediated endocytosis // n…
1416000_a_at	8645.39	9279.55	11604.3	7750.88	8093.77	9913.9	-0.000681202	0.120797	0.511056	1.42509	-0.133328	-0.0751694	0.300243	1.23135	3	NM_011034	Prdx1	peroxiredoxin 1	18477	chr4 D1|4 47.0 cM	0000302 // response to reactive oxygen species // inferred from mutant phenotype /// 0006979 // response to oxidative stress // inferred from direct assay /// 0006979 // response to oxidative stress // inferred from mutant phenotype /// 0008283 // cell proliferation // inferred from mutant phenotype /// 0019430 // removal of superoxide radicals // inferred from mutant phenotype /// 0032872 // reg…
1416167_at	1278.3	1385.17	3315.13	1285.99	1349.75	2310.29	-0.000682053	0.133643	1.4614	2.75375	0.0326891	0.0989157	0.953533	1.93661	2	NM_016764	Prdx4	peroxiredoxin 4	53381	chrX F3|X 67.7 cM	0045454 // cell redox homeostasis // inferred from electronic annotation /// 0055114 // oxidation reduction // inferred from electronic annotation
1423223_a_at	10050.7	9399.39	3676.76	6626.55	6513.24	3825.93	-0.00296093	-0.0785464	-1.3648	0.388289	-0.575568	-0.605388	-1.2896	0.409065	0	NM_007453	Prdx6	peroxiredoxin 6	11758	chr1 H2.1|1 83.6 cM	0000302 // response to reactive oxygen species // inferred from mutant phenotype /// 0016042 // lipid catabolic process // inferred from electronic annotation /// 0032060 // bleb formation // inferred from mutant phenotype /// 0045454 // cell redox homeostasis // inferred from electronic annotation /// 0055114 // oxidation reduction // inferred from electronic annotation
1451064_a_at	159.901	185.558	789.067	158.706	212.902	550.1	-0.00368818	0.22933	2.38885	5.23741	-0.000783538	0.431754	1.88409	3.69119	0	NM_177420	Psat1	phosphoserine aminotransferase 1	107272	chr19 A|19 32.5 cM	0006564 // L-serine biosynthetic process // inferred from electronic annotation /// 0008152 // metabolic process // inferred from electronic annotation /// 0008652 // amino acid biosynthetic process // inferred from electronic annotation
1420843_at	5089.61	5901.47	8689.4	3031.64	3308.24	5130.57	-0.00203805	0.233176	0.859034	1.81382	-0.72969	-0.602465	0.114536	1.08263	2	NM_011213	Ptprf	protein tyrosine phosphatase, receptor type, F	19268	chr4 C6-D1	0006470 // protein amino acid dephosphorylation // inferred from electronic annotation /// 0007155 // cell adhesion // inferred from electronic annotation /// 0007156 // homophilic cell adhesion // inferred from electronic annotation /// 0007399 // nervous system development // inferred from electronic annotation /// 0016311 // dephosphorylation // inferred from electronic annotation
1420841_at	1777.44	1907.15	3667.01	864.343	917.159	1801.9	-0.000857029	0.120881	1.12945	2.18775	-1.01478	-0.941775	0.123012	1.08901	3	NM_011213	Ptprf	protein tyrosine phosphatase, receptor type, F	19268	chr4 C6-D1	0006470 // protein amino acid dephosphorylation // inferred from electronic annotation /// 0007155 // cell adhesion // inferred from electronic annotation /// 0007156 // homophilic cell adhesion // inferred from electronic annotation /// 0007399 // nervous system development // inferred from electronic annotation /// 0016311 // dephosphorylation // inferred from electronic annotation
1452029_a_at	64.756	66.178	63.817	72.4213	67.4324	78.0703	-6.67957e-05	0.0508618	0.0637714	1.04519	0.186026	0.0775203	0.371602	1.29379	0	NM_001098233 /// NM_152821	Purg	purine-rich element binding protein G	75029	chr8 A4
1423903_at	411.693	435.908	1094.68	403.827	429.915	767.899	-0.00249905	0.0916762	1.49579	2.82019	-0.0029513	0.0825107	0.998901	1.99848	0	NM_027514	Pvr	poliovirus receptor	52118	chr7 A3|7 4.0 cM	0016337 // cell-cell adhesion // inferred from direct assay /// 0016477 // cell migration // inferred from direct assay
1451160_s_at	613.228	798.985	1693.45	607.927	698.303	1201.04	-0.00315083	0.400791	1.55123	2.93068	0.0120829	0.205469	1.07035	2.09994	0	NM_027514	Pvr	poliovirus receptor	52118	chr7 A3|7 4.0 cM	0016337 // cell-cell adhesion // inferred from direct assay /// 0016477 // cell migration // inferred from direct assay
[truncated: 109 more rows]
